# Supplementary material
Source: MDPI journal article supplement (https://www.mdpi.com/2075-163X/2/1/65)
Supplement: s1 [file s1]

## CHAPTER 1

### Model Output

#### 1.1. Africa

##### 1.1.1. DR Congo.

TABLE 1.1. Mining constants for DR Congo

| Name                    | $Y_s$ | $Q_T$   | $r_{Q_T}$ | $M_L$  | $M_H$  | $L_L$ | $L_H$ | $t_t$ | $r_t$   |
|-------------------------|-------|---------|-----------|--------|--------|-------|-------|-------|---------|
| Low Spodumene Manono 1  | 1954  | 0.36e-2 | 1.5       | 0.1e-2 | 0.1e-2 | 50    | 50    | NA    | NA      |
| Low Spodumene Manono 2  | 2030  | 1145    | 1.5       | 5      | 10     | 60    | 80    | 2070  | 0.37e-1 |
| Low Amblygonite Manono  | 1954  | 0.567   | 1.5       | 0.11   | 0.11   | 50    | 50    | NA    | NA      |
| BG Spodumene Manono 1   | 1954  | 0.36e-2 | 1.5       | 0.1e-2 | 0.1e-2 | 50    | 50    | NA    | NA      |
| BG Spodumene Manono 2   | 2030  | 1500    | 1.5       | 5      | 10     | 60    | 80    | 2070  | 0.37e-1 |
| BG Amblygonite Manono   | 1954  | 0.567   | 1.5       | 0.11   | 0.11   | 50    | 50    | NA    | NA      |
| High Spodumene Manono 1 | 1954  | 0.36e-2 | 1.5       | 0.1e-2 | 0.1e-2 | 50    | 50    | NA    | NA      |
| High Spodumene Manono 2 | 2030  | 2300    | 1.5       | 5      | 10     | 60    | 80    | 2070  | 0.37e-1 |
| High Amblygonite Manono | 1954  | 0.567   | 1.5       | 0.11   | 0.11   | 50    | 50    | NA    | NA      |

TABLE 1.2. Peak years for DR Congo

| Type               | Peak Year |      |      | Max Production |      |      |
|--------------------|-----------|------|------|----------------|------|------|
|                    | Low       | BG   | High | Low            | BG   | High |
| Amblygonite Manono | 1959      | 1959 | 1959 | 0.1            | 0.1  | 0.1  |
| Amblygonite Total  | 1959      | 1959 | 1959 | 0.1            | 0.1  | 0.1  |
| Spodumene Manono   | 2075      | 2085 | 2081 | 17.0           | 25.1 | 24.1 |
| Spodumene Total    | 2075      | 2085 | 2081 | 17.0           | 25.1 | 24.1 |
| Lithium            | 2075      | 2085 | 2081 | 17.0           | 25.1 | 24.1 |

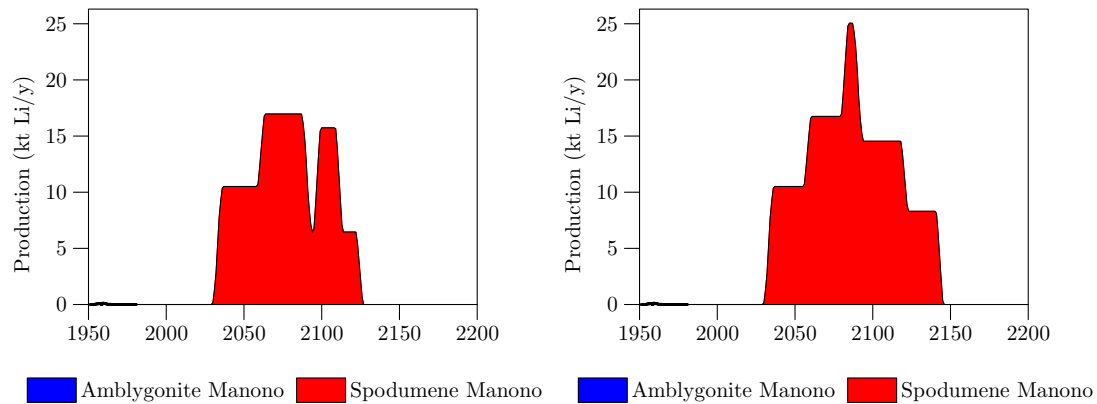

A Low

B BG

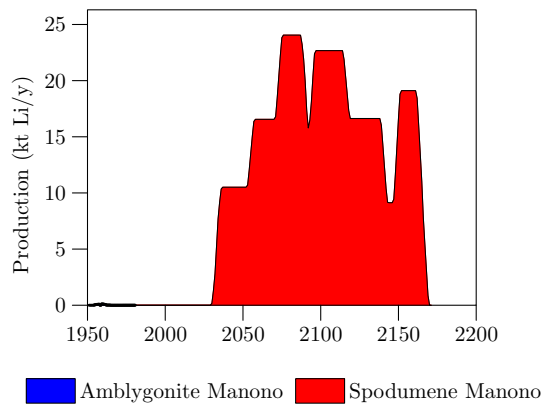

C High

FIGURE 1.1. Scenarios for DR Congo

TABLE 1.3. URR values for DR Congo

| Type               | URR    |        |        |
|--------------------|--------|--------|--------|
|                    | Low    | BG     | High   |
| Amblygonite Manono | 0.6    | 0.6    | 0.6    |
| Amblygonite Total  | 0.6    | 0.6    | 0.6    |
| Spodumene Manono   | 1145.0 | 1500.0 | 2300.0 |
| Spodumene Total    | 1145.0 | 1500.0 | 2300.0 |
| Lithium            | 1145.6 | 1500.6 | 2300.6 |

## 1.1.2. Mali.

TABLE 1.4. Mining constants for Mali

| Name                  | $Y_s$ | $Q_T$ | $r_{Q_T}$ | $M_L$ | $M_H$ | $L_L$ | $L_H$ | $t_t$ | $r_t$ |
|-----------------------|-------|-------|-----------|-------|-------|-------|-------|-------|-------|
| Low Mineral Bougouni  | 2020  | 3.7   | 4         | 0.2   | 0.2   | 60    | 60    | NA    | NA    |
| BG Mineral Bougouni   | 2020  | 3.7   | 4         | 0.2   | 0.2   | 60    | 60    | NA    | NA    |
| High Mineral Bougouni | 2020  | 13    | 4         | 0.5   | 0.5   | 60    | 60    | NA    | NA    |

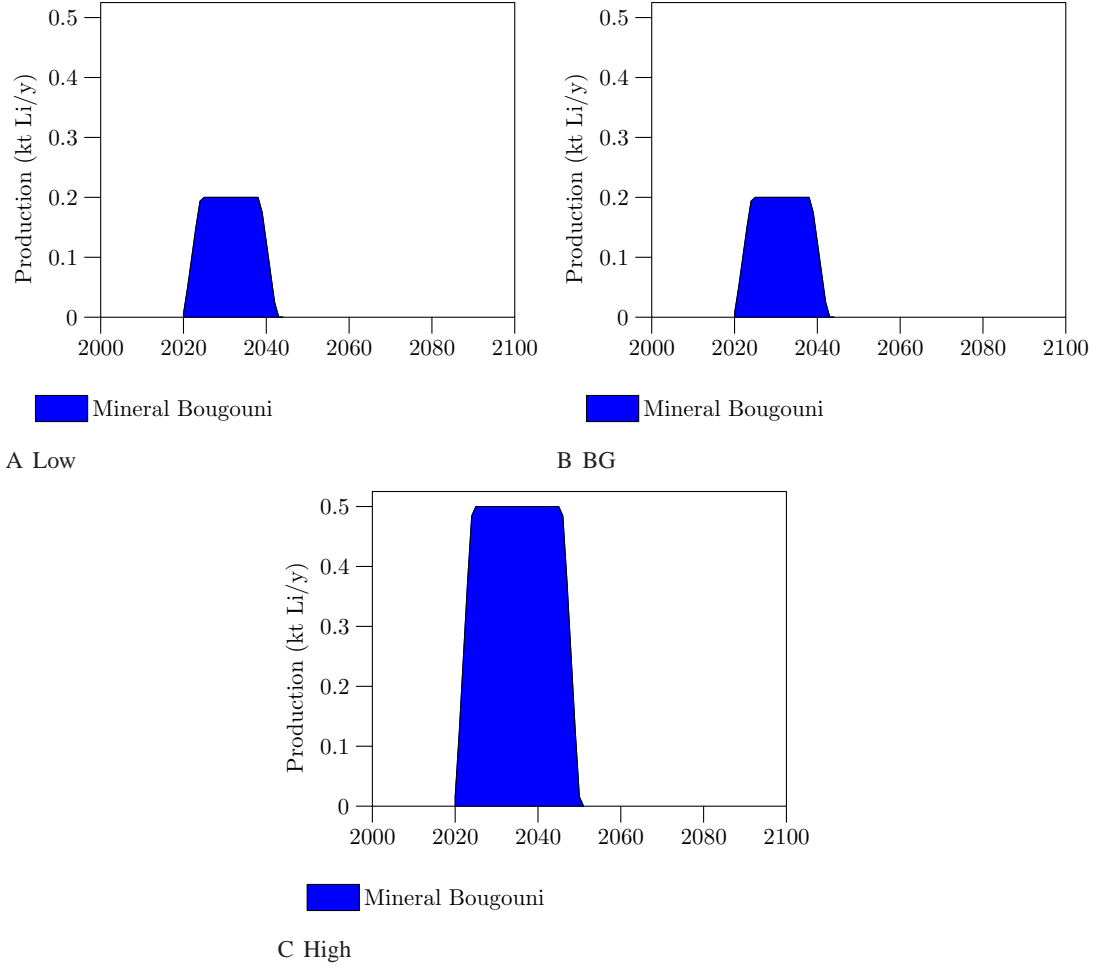

FIGURE 1.2. Scenarios for Mali

TABLE 1.5. Peak years for Mali

| Type             | Peak Year |      |      | Max Production |     |      |
|------------------|-----------|------|------|----------------|-----|------|
|                  | Low       | BG   | High | Low            | BG  | High |
| Mineral Bougouni | 2031      | 2031 | 2035 | 0.2            | 0.2 | 0.5  |
| Mineral Total    | 2031      | 2031 | 2035 | 0.2            | 0.2 | 0.5  |
| Lithium          | 2031      | 2031 | 2035 | 0.2            | 0.2 | 0.5  |

TABLE 1.6. URR values for Mali

| Type             | URR |     |      |
|------------------|-----|-----|------|
|                  | Low | BG  | High |
| Mineral Bougouni | 3.7 | 3.7 | 13.0 |
| Mineral Total    | 3.7 | 3.7 | 13.0 |
| Lithium          | 3.7 | 3.7 | 13.0 |

**1.1.3. Mozambique.**

TABLE 1.7. Mining constants for Mozambique

| Name             | $Y_s$ | $Q_T$   | $r_{Q_T}$ | $M_L$  | $M_H$  | $L_L$ | $L_H$ | $t_t$ | $r_t$ |
|------------------|-------|---------|-----------|--------|--------|-------|-------|-------|-------|
| Low Petalite     | 1955  | 0.35e-3 | 4         | 0.1e-2 | 0.1e-2 | 60    | 60    | NA    | NA    |
| Low Amblygonite  | 1969  | 0.25e-2 | 4         | 0.1e-2 | 0.1e-2 | 60    | 60    | NA    | NA    |
| Low Spodumene    | 1976  | 0.15e-2 | 4         | 0.1e-1 | 0.1e-1 | 60    | 60    | NA    | NA    |
| Low Lepidolite   | 1950  | 0.190   | 4         | 0.1e-1 | 0.1e-1 | 60    | 60    | NA    | NA    |
| BG Petalite      | 1955  | 0.35e-3 | 4         | 0.1e-2 | 0.1e-2 | 60    | 60    | NA    | NA    |
| BG Amblygonite   | 1969  | 0.25e-2 | 4         | 0.1e-2 | 0.1e-2 | 60    | 60    | NA    | NA    |
| BG Spodumene     | 1976  | 0.15e-2 | 4         | 0.1e-1 | 0.1e-1 | 60    | 60    | NA    | NA    |
| BG Lepidolite    | 1950  | 0.190   | 4         | 0.1e-1 | 0.1e-1 | 60    | 60    | NA    | NA    |
| High Petalite    | 1955  | 0.35e-3 | 4         | 0.1e-2 | 0.1e-2 | 60    | 60    | NA    | NA    |
| High Amblygonite | 1969  | 0.25e-2 | 4         | 0.1e-2 | 0.1e-2 | 60    | 60    | NA    | NA    |
| High Spodumene   | 1976  | 0.15e-2 | 4         | 0.1e-1 | 0.1e-1 | 60    | 60    | NA    | NA    |
| High Lepidolite  | 1950  | 0.190   | 4         | 0.1e-1 | 0.1e-1 | 60    | 60    | NA    | NA    |

TABLE 1.8. Peak years for Mozambique

| Type        | Peak Year |      |      | Max Production |     |      |
|-------------|-----------|------|------|----------------|-----|------|
|             | Low       | BG   | High | Low            | BG  | High |
| Amblygonite | 1972      | 1972 | 1972 | 0.0            | 0.0 | 0.0  |
| Lepidolite  | 1961      | 1961 | 1961 | 0.0            | 0.0 | 0.0  |
| Petalite    | 1956      | 1956 | 1956 | 0.0            | 0.0 | 0.0  |
| Spodumene   | 1977      | 1977 | 1977 | 0.0            | 0.0 | 0.0  |
| Lithium     | 1956      | 1956 | 1956 | 0.0            | 0.0 | 0.0  |

TABLE 1.9. URR values for Mozambique

| Type        | URR |     |      |
|-------------|-----|-----|------|
|             | Low | BG  | High |
| Amblygonite | -   | -   | -    |
| Lepidolite  | 0.2 | 0.2 | 0.2  |
| Petalite    | -   | -   | -    |
| Spodumene   | -   | -   | -    |
| Lithium     | 0.2 | 0.2 | 0.2  |

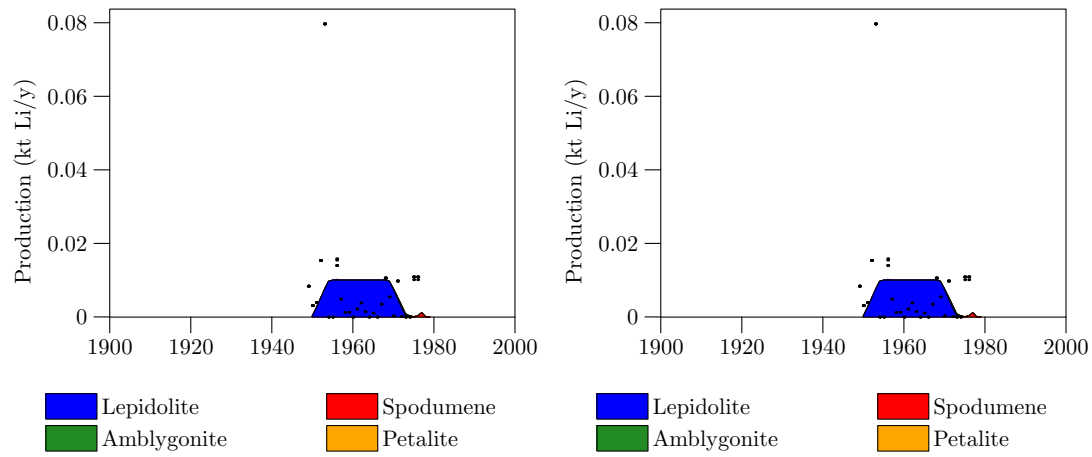

A Low

B BG

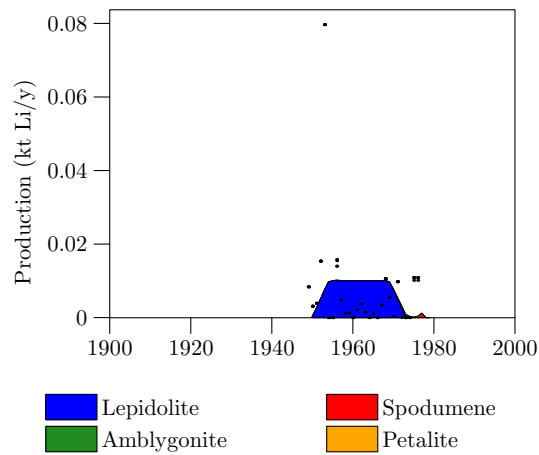

C High

FIGURE 1.3. Scenarios for Mozambique

## 1.1.4. Namibia.

TABLE 1.10. Mining constants for Namibia

| Name                   | $Y_s$ | $Q_T$ | $r_{Q_T}$ | $M_L$ | $M_H$ | $L_L$ | $L_H$ | $t_t$ | $r_t$ |
|------------------------|-------|-------|-----------|-------|-------|-------|-------|-------|-------|
| Low Mineral Karibib 1  | 1950  | 6.209 | 4         | 0.3   | 0.3   | 60    | 60    | NA    | NA    |
| Low Mineral Karibib 2  | 2020  | 5.75  | 4         | 0.3   | 0.3   | 60    | 60    | NA    | NA    |
| BG Mineral Karibib 1   | 1950  | 6.209 | 4         | 0.3   | 0.3   | 60    | 60    | NA    | NA    |
| BG Mineral Karibib 2   | 2020  | 9.8   | 4         | 0.3   | 0.3   | 60    | 60    | NA    | NA    |
| High Mineral Karibib 1 | 1950  | 6.209 | 4         | 0.3   | 0.3   | 60    | 60    | NA    | NA    |
| High Mineral Karibib 2 | 2020  | 9.8   | 4         | 0.3   | 0.3   | 60    | 60    | NA    | NA    |

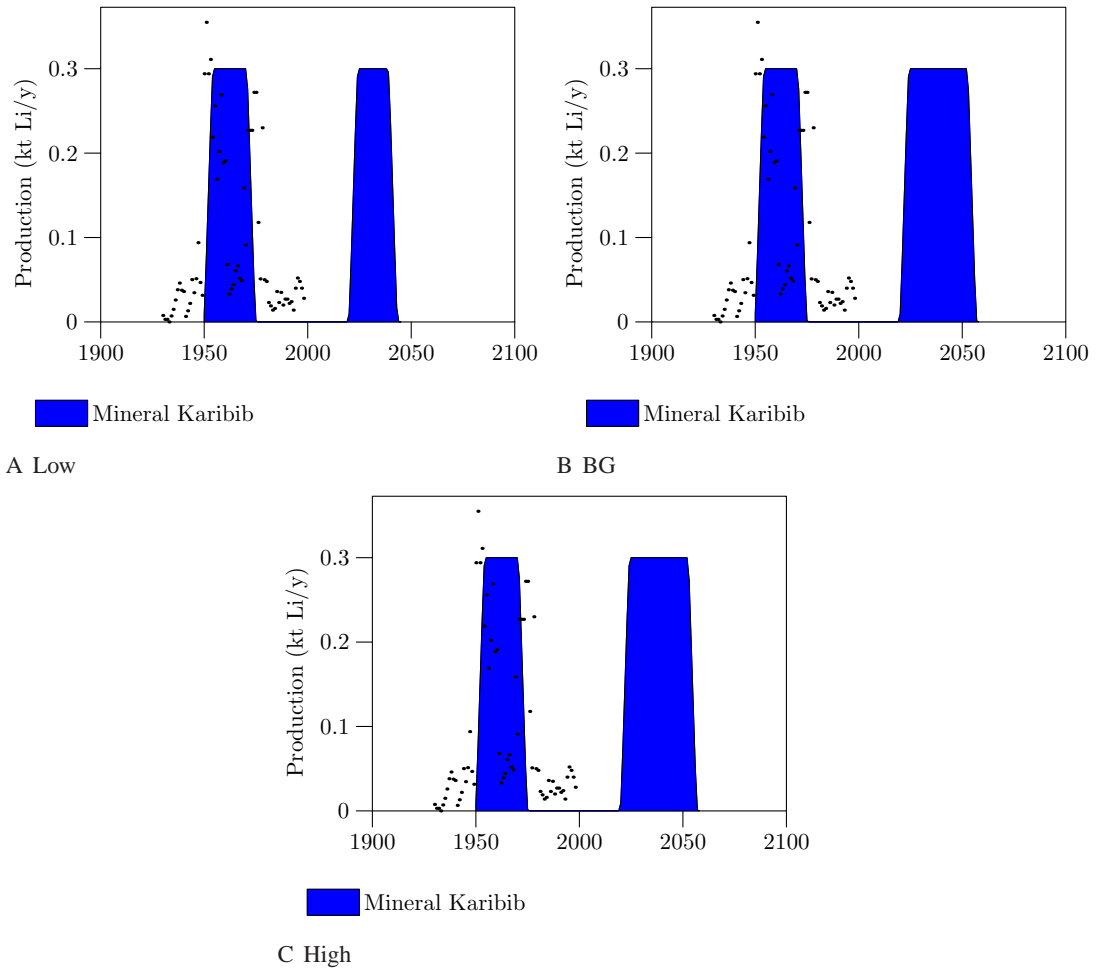

FIGURE 1.4. Scenarios for Namibia

TABLE 1.11. Peak years for Namibia

| Type            | Peak Year |      |      | Max Production |     |      |
|-----------------|-----------|------|------|----------------|-----|------|
|                 | Low       | BG   | High | Low            | BG  | High |
| Mineral Karibib | 1996      | 2003 | 2003 | 0.3            | 0.3 | 0.3  |
| Mineral Total   | 1996      | 2003 | 2003 | 0.3            | 0.3 | 0.3  |
| Lithium         | 1996      | 2003 | 2003 | 0.3            | 0.3 | 0.3  |

TABLE 1.12. URR values for Namibia

| Type            | URR  |      |      |
|-----------------|------|------|------|
|                 | Low  | BG   | High |
| Mineral Karibib | 12.0 | 16.0 | 16.0 |
| Mineral Total   | 12.0 | 16.0 | 16.0 |
| Lithium         | 12.0 | 16.0 | 16.0 |



## 1.1.5. South Africa.

TABLE 1.13. Mining constants for South Africa

| Name             | $Y_s$ | $Q_T$   | $r_{Q_T}$ | $M_L$  | $M_H$  | $L_L$ | $L_H$ | $t_t$ | $r_t$ |
|------------------|-------|---------|-----------|--------|--------|-------|-------|-------|-------|
| Low Spodumene 1  | 1960  | 0.93e-1 | 4         | 0.3e-1 | 0.3e-1 | 60    | 60    | NA    | NA    |
| Low Spodumene 2  | 2020  | 15      | 4         | 0.5    | 0.5    | 60    | 60    | NA    | NA    |
| Low Amblygonite  | 1952  | 0.50e-1 | 4         | 0.3e-1 | 0.3e-1 | 60    | 60    | NA    | NA    |
| BG Spodumene 1   | 1960  | 0.93e-1 | 4         | 0.3e-1 | 0.3e-1 | 60    | 60    | NA    | NA    |
| BG Spodumene 2   | 2020  | 15      | 4         | 0.5    | 0.5    | 60    | 60    | NA    | NA    |
| BG Amblygonite   | 1952  | 0.50e-1 | 4         | 0.3e-1 | 0.3e-1 | 60    | 60    | NA    | NA    |
| High Spodumene 1 | 1960  | 0.93e-1 | 4         | 0.3e-1 | 0.3e-1 | 60    | 60    | NA    | NA    |
| High Spodumene 2 | 2020  | 15      | 4         | 0.5    | 0.5    | 60    | 60    | NA    | NA    |
| High Amblygonite | 1952  | 0.50e-1 | 4         | 0.3e-1 | 0.3e-1 | 60    | 60    | NA    | NA    |

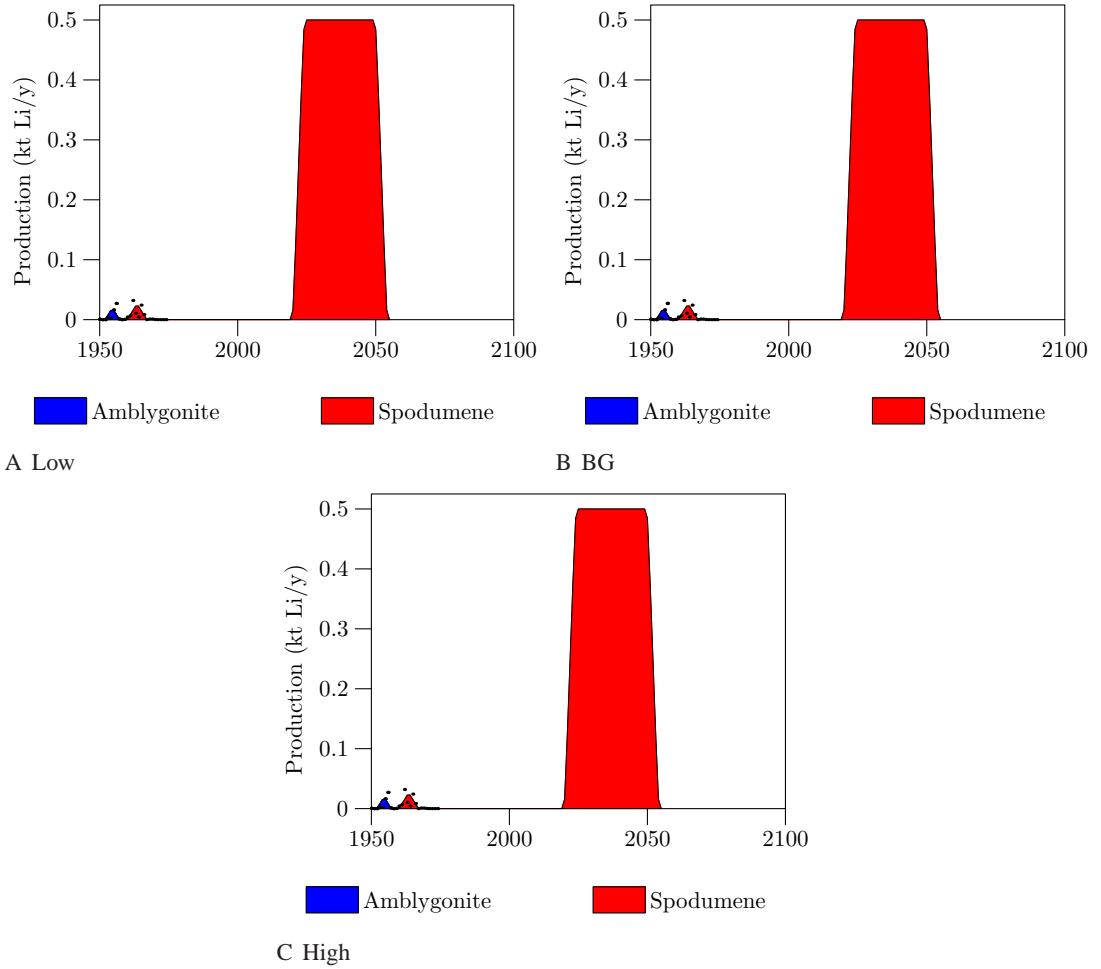

FIGURE 1.5. Scenarios for South Africa

TABLE 1.14. Peak years for South Africa

| Type        | Peak Year |      |      | Max Production |     |      |
|-------------|-----------|------|------|----------------|-----|------|
|             | Low       | BG   | High | Low            | BG  | High |
| Amblygonite | 1955      | 1955 | 1955 | 0.0            | 0.0 | 0.0  |
| Spodumene   | 2037      | 2037 | 2037 | 0.5            | 0.5 | 0.5  |
| Lithium     | 2037      | 2037 | 2037 | 0.5            | 0.5 | 0.5  |

TABLE 1.15. URR values for South Africa

| Type        | URR  |      |      |
|-------------|------|------|------|
|             | Low  | BG   | High |
| Amblygonite | 0.1  | 0.1  | 0.1  |
| Spodumene   | 15.1 | 15.1 | 15.1 |
| Lithium     | 15.1 | 15.1 | 15.1 |

### 1.1.6. Uganda.

TABLE 1.16. Mining constants for Uganda

| Name             | $Y_s$ | $Q_T$   | $r_{Q_T}$ | $M_L$  | $M_H$  | $L_L$ | $L_H$ | $t_t$ | $r_t$ |
|------------------|-------|---------|-----------|--------|--------|-------|-------|-------|-------|
| Low Amblygonite  | 1950  | 0.34e-1 | 4         | 0.5e-2 | 0.5e-2 | 60    | 60    | NA    | NA    |
| BG Amblygonite   | 1950  | 0.34e-1 | 4         | 0.5e-2 | 0.5e-2 | 60    | 60    | NA    | NA    |
| High Amblygonite | 1950  | 0.34e-1 | 4         | 0.5e-2 | 0.5e-2 | 60    | 60    | NA    | NA    |

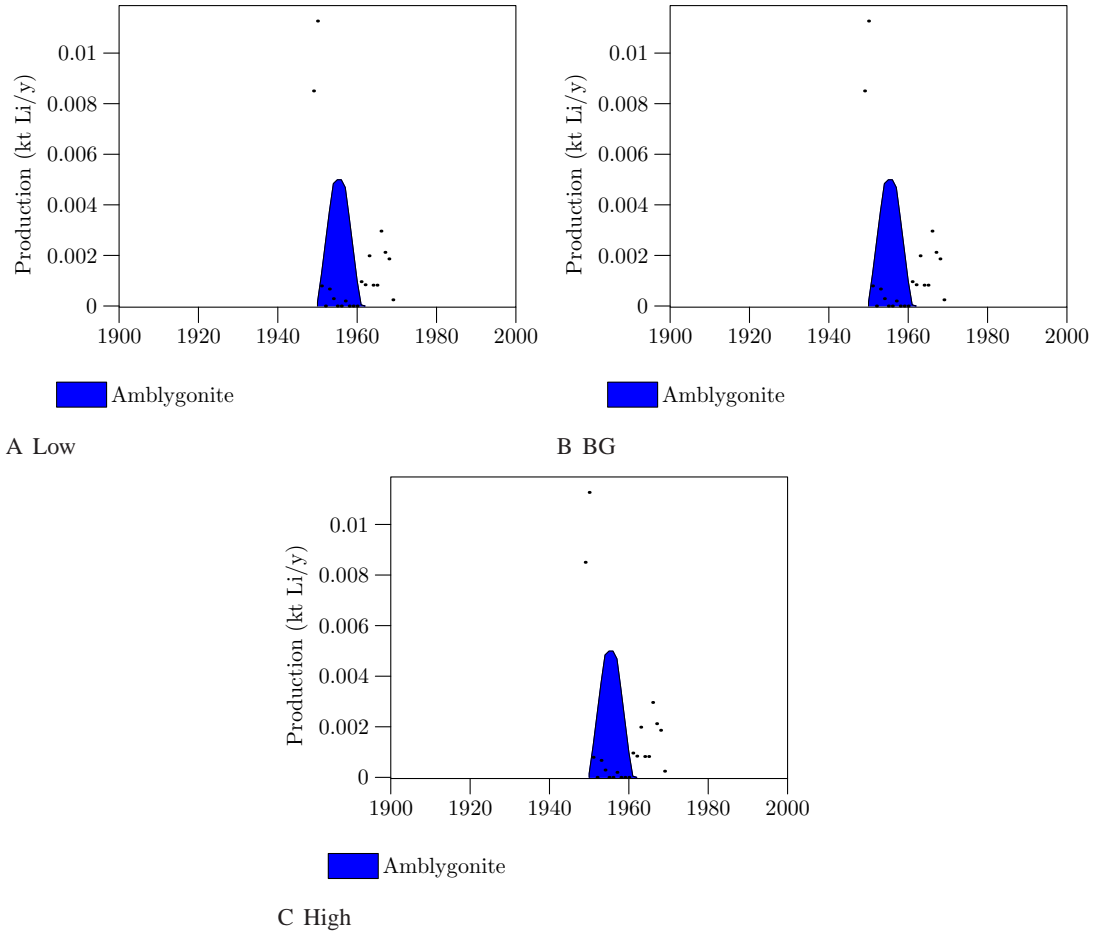

FIGURE 1.6. Scenarios for Uganda

TABLE 1.17. Peak years for Uganda

| Type        | Peak Year |      |      | Max Production |     |      |
|-------------|-----------|------|------|----------------|-----|------|
|             | Low       | BG   | High | Low            | BG  | High |
| Amblygonite | 1955      | 1955 | 1955 | 0.0            | 0.0 | 0.0  |
| Lithium     | 1955      | 1955 | 1955 | 0.0            | 0.0 | 0.0  |

TABLE 1.18. URR values for Uganda

| Type        | URR |    |      |
|-------------|-----|----|------|
|             | Low | BG | High |
| Amblygonite | -   | -  | -    |
| Lithium     | -   | -  | -    |

## 1.1.7. Zimbabwe.

TABLE 1.19. Mining constants for Zimbabwe

| Name                  | $Y_s$ | $Q_T$  | $r_{Q_T}$ | $M_L$ | $M_H$ | $L_L$ | $L_H$ | $t_t$ | $r_t$   |
|-----------------------|-------|--------|-----------|-------|-------|-------|-------|-------|---------|
| Low Mineral Bikita    | 1953  | 69.805 | 1.5       | 0.8   | 0.8   | 80    | 80    | NA    | NA      |
| BG Mineral Bikita     | 1953  | 69.805 | 1.5       | 0.8   | 0.8   | 80    | 80    | NA    | NA      |
| High Mineral Bikita 1 | 1955  | 46.805 | 1.5       | 1     | 1     | 60    | 80    | 2070  | 0.37e-1 |
| High Mineral Bikita 2 | 2008  | 57     | 1.5       | 0.8   | 0.8   | 80    | 80    | NA    | NA      |

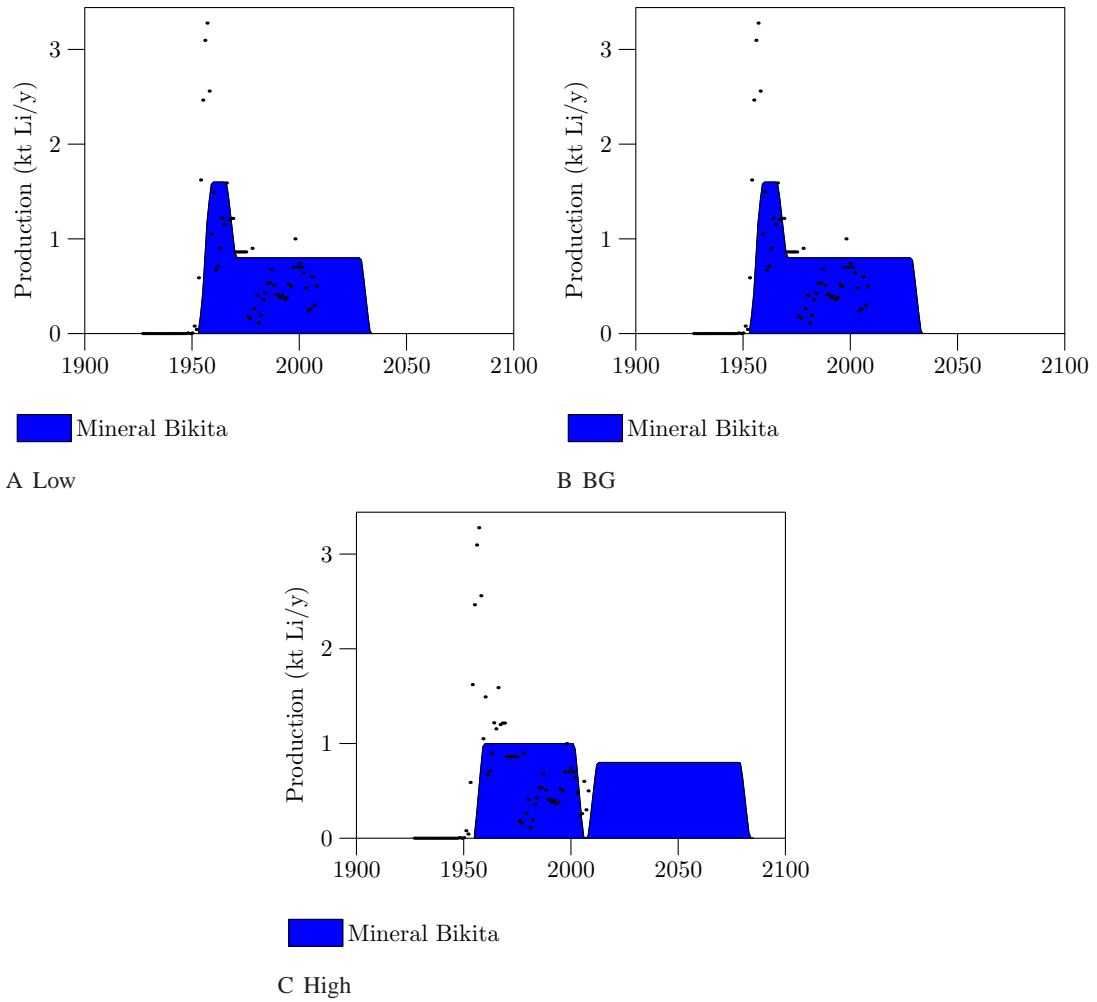

FIGURE 1.7. Scenarios for Zimbabwe

TABLE 1.20. Peak years for Zimbabwe

| Type           | Peak Year |      |      | Max Production |     |      |
|----------------|-----------|------|------|----------------|-----|------|
|                | Low       | BG   | High | Low            | BG  | High |
| Mineral Bikita | 1962      | 1962 | 1980 | 1.6            | 1.6 | 1.0  |
| Mineral Total  | 1962      | 1962 | 1980 | 1.6            | 1.6 | 1.0  |
| Lithium        | 1962      | 1962 | 1980 | 1.6            | 1.6 | 1.0  |

TABLE 1.21. URR values for Zimbabwe

| Type           | URR  |      |       |
|----------------|------|------|-------|
|                | Low  | BG   | High  |
| Mineral Bikita | 69.8 | 69.8 | 103.8 |
| Mineral Total  | 69.8 | 69.8 | 103.8 |
| Lithium        | 69.8 | 69.8 | 103.8 |

## 1.1.8. Africa.

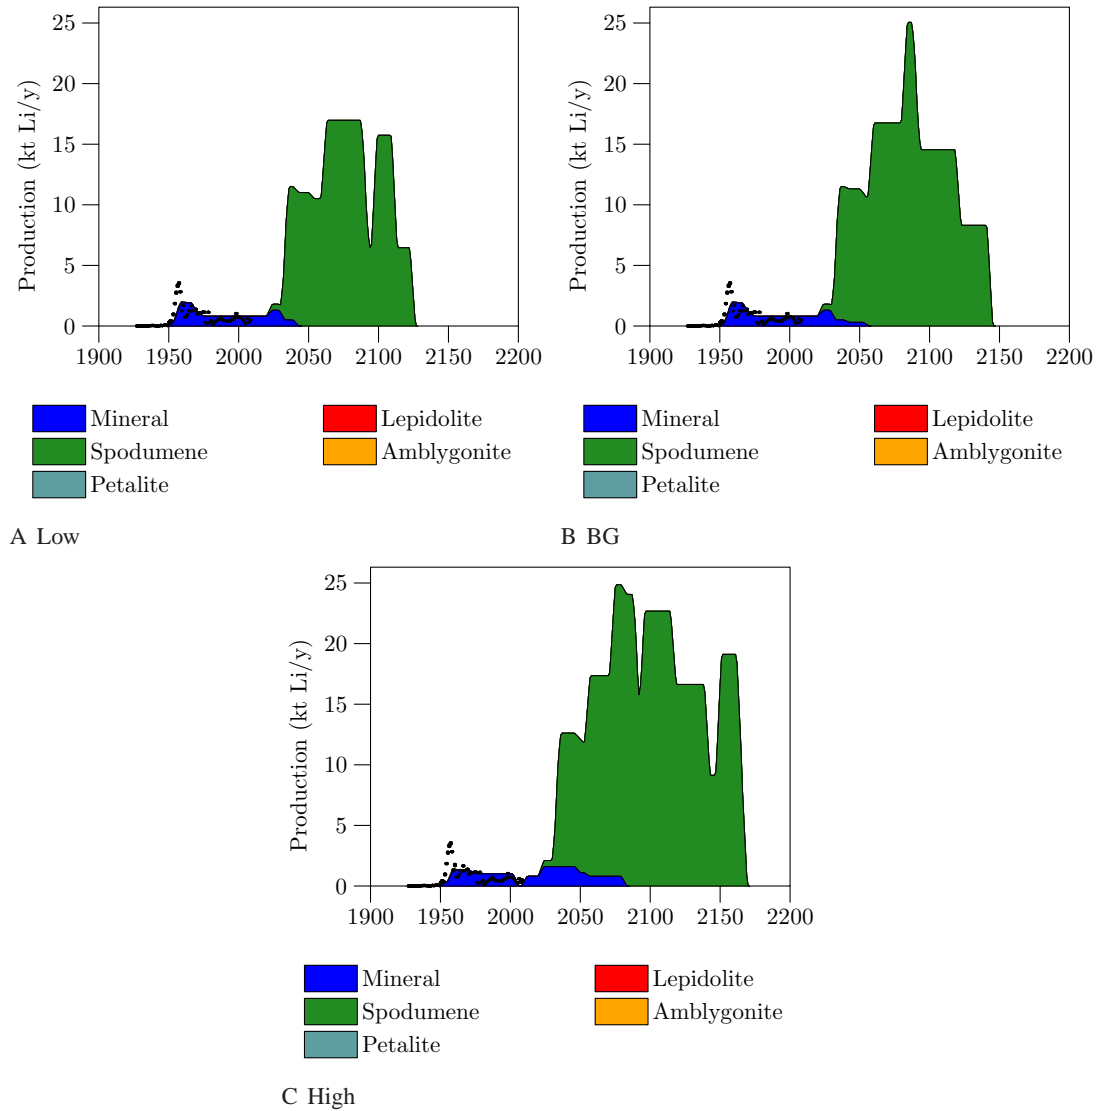

FIGURE 1.8. Scenarios for Africa

TABLE 1.22. Peak years for Africa

| Type        | Peak Year |      |      | Max Production |      |      |
|-------------|-----------|------|------|----------------|------|------|
|             | Low       | BG   | High | Low            | BG   | High |
| Amblygonite | 1959      | 1959 | 1959 | 0.1            | 0.1  | 0.1  |
| Lepidolite  | 1961      | 1961 | 1961 | 0.0            | 0.0  | 0.0  |
| Mineral     | 1962      | 1962 | 2035 | 1.9            | 1.9  | 1.6  |
| Petalite    | 1956      | 1956 | 1956 | 0.0            | 0.0  | 0.0  |
| Spodumene   | 2075      | 2085 | 2081 | 17.0           | 25.1 | 24.1 |
| Lithium     | 2075      | 2085 | 2077 | 17.0           | 25.1 | 24.9 |

TABLE 1.23. URR values for Africa

| Type        | URR    |        |        |
|-------------|--------|--------|--------|
|             | Low    | BG     | High   |
| Amblygonite | 1246.4 | 1605.5 | 2448.8 |
| Lepidolite  | 85.7   | 89.7   | 133.0  |
| Mineral     | 85.5   | 89.5   | 132.8  |
| Petalite    | 1246.4 | 1605.5 | 2448.8 |
| Spodumene   | 1245.8 | 1604.8 | 2448.1 |
| Lithium     | 3909.7 | 4994.9 | 7611.4 |



## 1.2. Asia

## 1.2.1. Australia.

TABLE 1.24. Mining constants for Australia

| Name                         | $Y_s$ | $Q_T$   | $r_{Q_T}$ | $M_L$   | $M_H$   | $L_L$ | $L_H$ | $t_t$ | $r_t$ |
|------------------------------|-------|---------|-----------|---------|---------|-------|-------|-------|-------|
| Low Spodumene Mt Cattlin     | 2010  | 20      | 4         | 3.5     | 3.5     | 20    | 20    | NA    | NA    |
| Low Spodumene Mt Marion      | 2010  | 9.9     | 4         | 6       | 6       | 50    | 50    | NA    | NA    |
| Low Spodumene Greenbushes 1  | 1985  | 17      | 4         | 1.5     | 1.5     | 50    | 50    | NA    | NA    |
| Low Spodumene Greenbushes 2  | 2000  | 166.297 | 4         | 6.5     | 6.5     | 50    | 50    | NA    | NA    |
| Low Amblygonite Finniss      | 1924  | 0.3e-2  | 4         | 0.6e-2  | 0.6e-2  | 50    | 50    | NA    | NA    |
| Low Amblygonite Euriowie     | 1960  | 0.37e-2 | 4         | 0.4e-2  | 0.4e-2  | 50    | 50    | NA    | NA    |
| Low Amblygonite Ubini        | 1910  | 0.13e-3 | 4         | 0.5e-2  | 0.5e-2  | 50    | 50    | NA    | NA    |
| Low Spodumene Ravensthorpe   | 1961  | 0.33e-2 | 4         | 0.5e-2  | 0.5e-2  | 50    | 50    | NA    | NA    |
| Low Petalite Londonderry     | 1963  | 0.113   | 4         | 0.2e-1  | 0.2e-1  | 50    | 50    | NA    | NA    |
| BG Spodumene Mt Cattlin      | 2010  | 55.5    | 4         | 3.5     | 3.5     | 20    | 20    | NA    | NA    |
| BG Spodumene Mt Marion       | 2010  | 29.77   | 4         | 6       | 6       | 50    | 50    | NA    | NA    |
| BG Spodumene Greenbushes 1   | 1985  | 17      | 4         | 1.5     | 1.5     | 50    | 50    | NA    | NA    |
| BG Spodumene Greenbushes 2   | 2000  | 261.797 | 4         | 6.5     | 6.5     | 50    | 50    | NA    | NA    |
| BG Amblygonite Finniss       | 1924  | 0.3e-2  | 4         | 0.6e-2  | 0.6e-2  | 50    | 50    | NA    | NA    |
| BG Amblygonite Euriowie      | 1960  | 0.37e-2 | 4         | 0.4e-2  | 0.4e-2  | 50    | 50    | NA    | NA    |
| BG Amblygonite Ubini         | 1910  | 0.13e-3 | 4         | 0.5e-2  | 0.5e-2  | 50    | 50    | NA    | NA    |
| BG Spodumene Ravensthorpe    | 1961  | 0.33e-2 | 4         | 0.5e-2  | 0.5e-2  | 50    | 50    | NA    | NA    |
| BG Petalite Londonderry      | 1963  | 0.113   | 4         | 0.20e-1 | 0.20e-1 | 50    | 50    | NA    | NA    |
| High Spodumene Mt Cattlin    | 2010  | 55.5    | 4         | 3.5     | 3.5     | 20    | 20    | NA    | NA    |
| High Spodumene Mt Marion     | 2010  | 29.77   | 4         | 6       | 6       | 50    | 50    | NA    | NA    |
| High Spodumene Greenbushes 1 | 1985  | 17      | 4         | 1.5     | 1.5     | 50    | 50    | NA    | NA    |
| High Spodumene Greenbushes 2 | 2000  | 598.797 | 4         | 3.25    | 3.25    | 50    | 50    | NA    | NA    |
| High Amblygonite Finniss     | 1924  | 0.3e-2  | 4         | 0.6e-2  | 0.6e-2  | 50    | 50    | NA    | NA    |
| High Amblygonite Euriowie    | 1960  | 0.37e-2 | 4         | 0.4e-2  | 0.4e-2  | 50    | 50    | NA    | NA    |
| High Amblygonite Ubini       | 1910  | 0.13e-3 | 4         | 0.5e-2  | 0.5e-2  | 50    | 50    | NA    | NA    |
| High Spodumene Ravensthorpe  | 1961  | 0.33e-2 | 4         | 0.5e-2  | 0.5e-2  | 50    | 50    | NA    | NA    |
| High Petalite Londonderry    | 1963  | 0.113   | 4         | 0.20e-1 | 0.20e-1 | 50    | 50    | NA    | NA    |

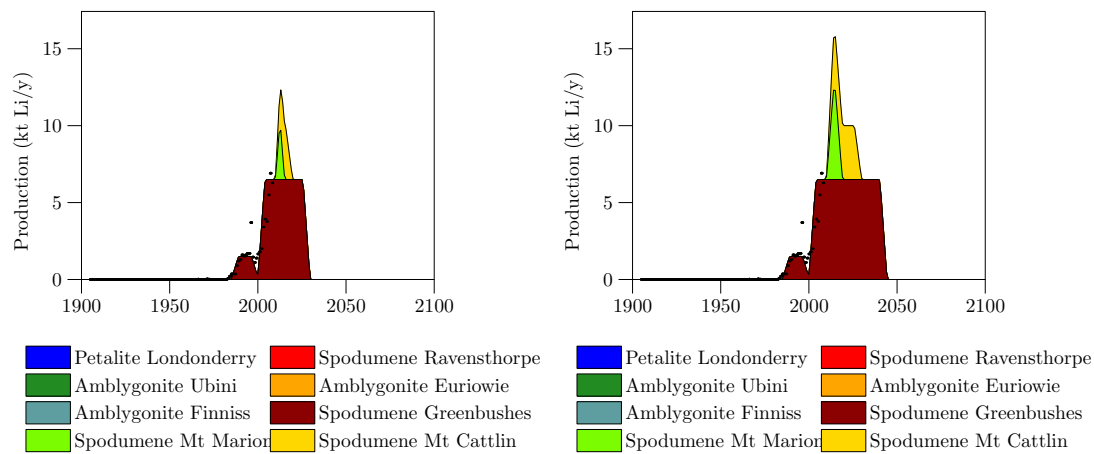

A Low

B BG

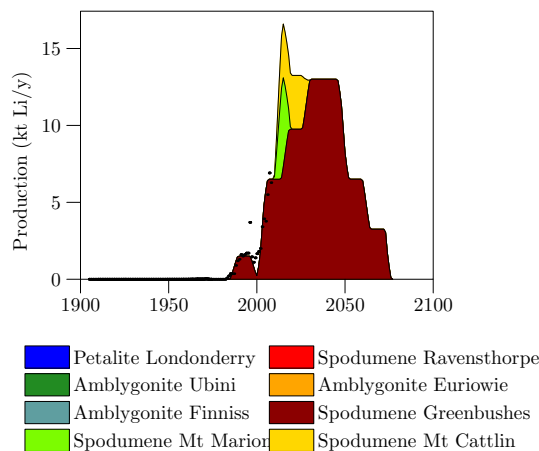

C High

FIGURE 1.9. Scenarios for Australia

TABLE 1.25. Peak years for Australia

| Type                   | Peak Year |      |      | Max Production |      |      |
|------------------------|-----------|------|------|----------------|------|------|
|                        | Low       | BG   | High | Low            | BG   | High |
| Amblygonite Euriowie   | 1962      | 1962 | 1962 | 0.0            | 0.0  | 0.0  |
| Amblygonite Finnis     | 1925      | 1925 | 1925 | 0.0            | 0.0  | 0.0  |
| Amblygonite Ubini      | 1910      | 1910 | 1910 | 0.0            | 0.0  | 0.0  |
| Amblygonite Total      | 1962      | 1962 | 1962 | 0.0            | 0.0  | 0.0  |
| Petalite Londonderry   | 1968      | 1968 | 1968 | 0.0            | 0.0  | 0.0  |
| Petalite Total         | 1968      | 1968 | 1968 | 0.0            | 0.0  | 0.0  |
| Spodumene Greenbushes  | 2015      | 2022 | 2038 | 6.5            | 6.5  | 13.0 |
| Spodumene Mt Cattlin   | 2015      | 2020 | 2020 | 3.5            | 3.5  | 3.5  |
| Spodumene Mt Marion    | 2013      | 2014 | 2014 | 3.2            | 5.8  | 5.8  |
| Spodumene Ravensthorpe | 1963      | 1963 | 1963 | 0.0            | 0.0  | 0.0  |
| Spodumene Total        | 2013      | 2015 | 2015 | 12.3           | 15.8 | 16.6 |
| Lithium                | 2013      | 2015 | 2015 | 12.3           | 15.8 | 16.6 |

TABLE 1.26. URR values for Australia

| Type                   | URR   |       |       |
|------------------------|-------|-------|-------|
|                        | Low   | BG    | High  |
| Amblygonite Euriowie   | -     | -     | -     |
| Amblygonite Finniss    | -     | -     | -     |
| Amblygonite Ubini      | -     | -     | -     |
| Amblygonite Total      | -     | -     | -     |
| Petalite Londonderry   | 0.1   | 0.1   | 0.1   |
| Petalite Total         | 0.1   | 0.1   | 0.1   |
| Spodumene Greenbushes  | 183.3 | 278.8 | 615.8 |
| Spodumene Mt Cattlin   | 20.0  | 55.5  | 55.5  |
| Spodumene Mt Marion    | 9.9   | 29.8  | 29.8  |
| Spodumene Ravensthorpe | -     | -     | -     |
| Spodumene Total        | 213.2 | 364.1 | 701.1 |
| Lithium                | 213.3 | 364.2 | 701.2 |

### 1.2.2. China.

TABLE 1.27. Mining constants for China

| Name         | $Y_s$ | $Q_T$    | $r_{Q_T}$ | $M_L$ | $M_H$ | $L_L$ | $L_H$ | $t_t$ | $r_t$ |
|--------------|-------|----------|-----------|-------|-------|-------|-------|-------|-------|
| Low Unknown  | 1984  | 2558.396 | 2         | 1.4   | 1.4   | 70    | 70    | NA    | NA    |
| BG Unknown   | 1984  | 2966.096 | 2         | 1.4   | 1.4   | 70    | 70    | NA    | NA    |
| High Unknown | 1984  | 6231.396 | 1.5       | 1.4   | 1.4   | 70    | 70    | NA    | NA    |

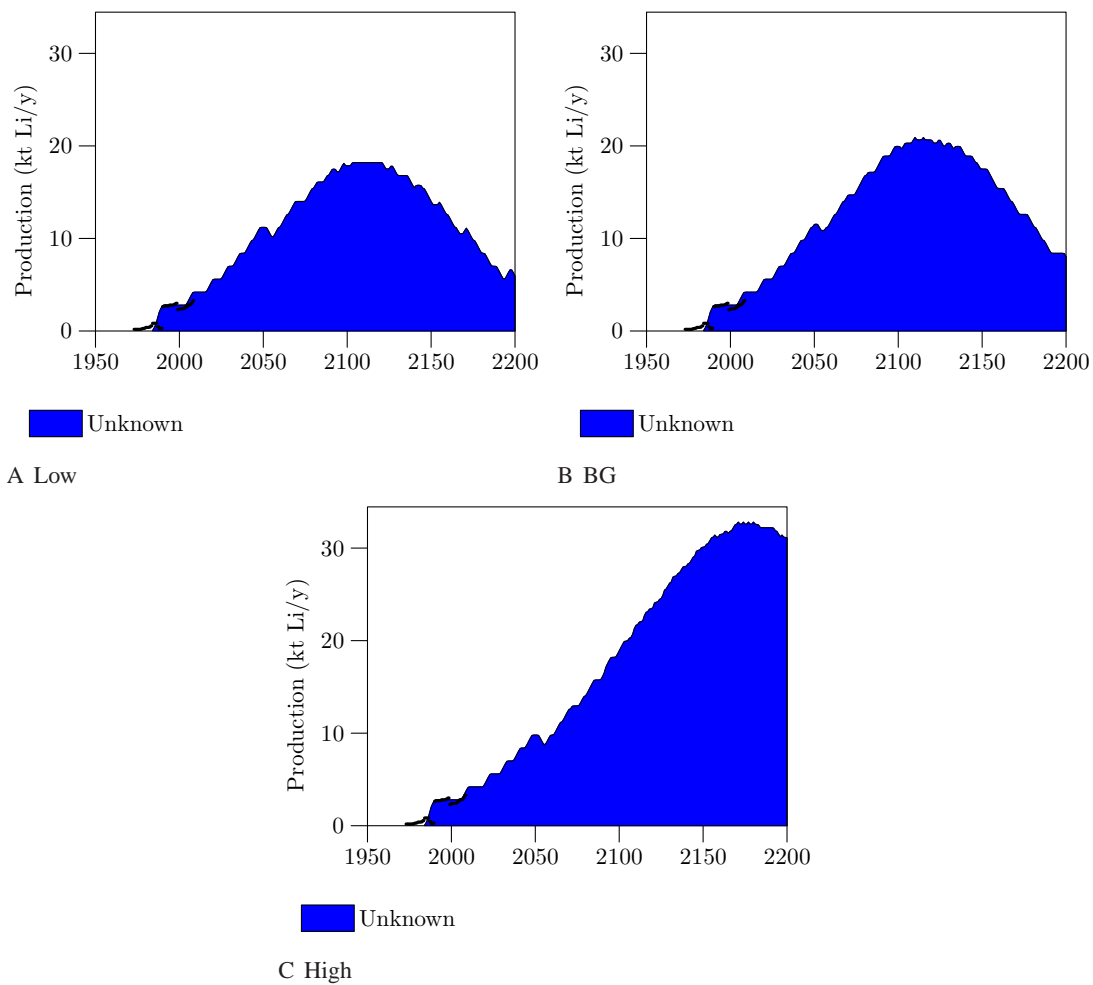

FIGURE 1.10. Scenarios for China

TABLE 1.28. Peak years for China

| Type    | Peak Year |      |      | Max Production |      |      |
|---------|-----------|------|------|----------------|------|------|
|         | Low       | BG   | High | Low            | BG   | High |
| Unknown | 2112      | 2112 | 2175 | 18.2           | 20.9 | 32.8 |
| Lithium | 2112      | 2112 | 2175 | 18.2           | 20.9 | 32.8 |

TABLE 1.29. URR values for China

| Type    | URR    |        |        |
|---------|--------|--------|--------|
|         | Low    | BG     | High   |
| Unknown | 2558.4 | 2966.1 | 6231.4 |
| Lithium | 2558.4 | 2966.1 | 6231.4 |

### 1.2.3. Korea.

TABLE 1.30. Mining constants for Korea

| Name         | $Y_s$ | $Q_T$   | $r_{Q_T}$ | $M_L$  | $M_H$  | $L_L$ | $L_H$ | $t_t$ | $r_t$ |
|--------------|-------|---------|-----------|--------|--------|-------|-------|-------|-------|
| Low Mineral  | 1943  | 0.15e-1 | 4         | 0.4e-1 | 0.4e-1 | 60    | 60    | NA    | NA    |
| BG Mineral   | 1943  | 0.15e-1 | 4         | 0.4e-1 | 0.4e-1 | 60    | 60    | NA    | NA    |
| High Mineral | 1943  | 0.15e-1 | 4         | 0.4e-1 | 0.4e-1 | 60    | 60    | NA    | NA    |

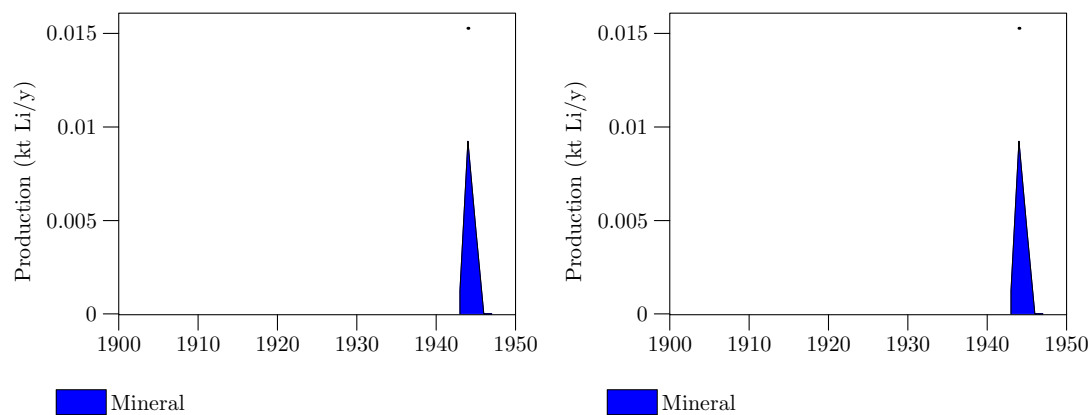

A Low

B BG

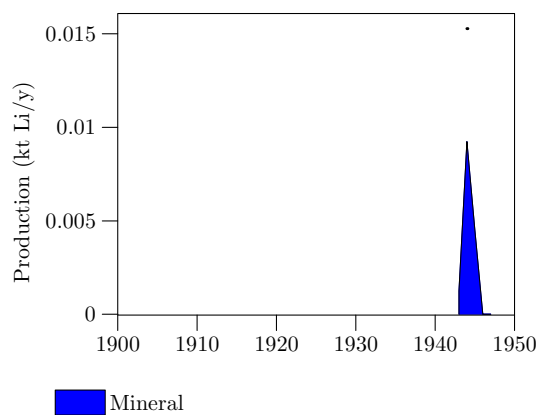

C High

FIGURE 1.11. Scenarios for Korea

TABLE 1.31. Peak years for Korea

| Type    | Peak Year |      |      | Max Production |     |      |
|---------|-----------|------|------|----------------|-----|------|
|         | Low       | BG   | High | Low            | BG  | High |
| Mineral | 1944      | 1944 | 1944 | 0.0            | 0.0 | 0.0  |
| Lithium | 1944      | 1944 | 1944 | 0.0            | 0.0 | 0.0  |

TABLE 1.32. URR values for Korea

| Type    | URR |    |      |
|---------|-----|----|------|
|         | Low | BG | High |
| Mineral | -   | -  | -    |
| Lithium | -   | -  | -    |

### 1.2.4. Asia.

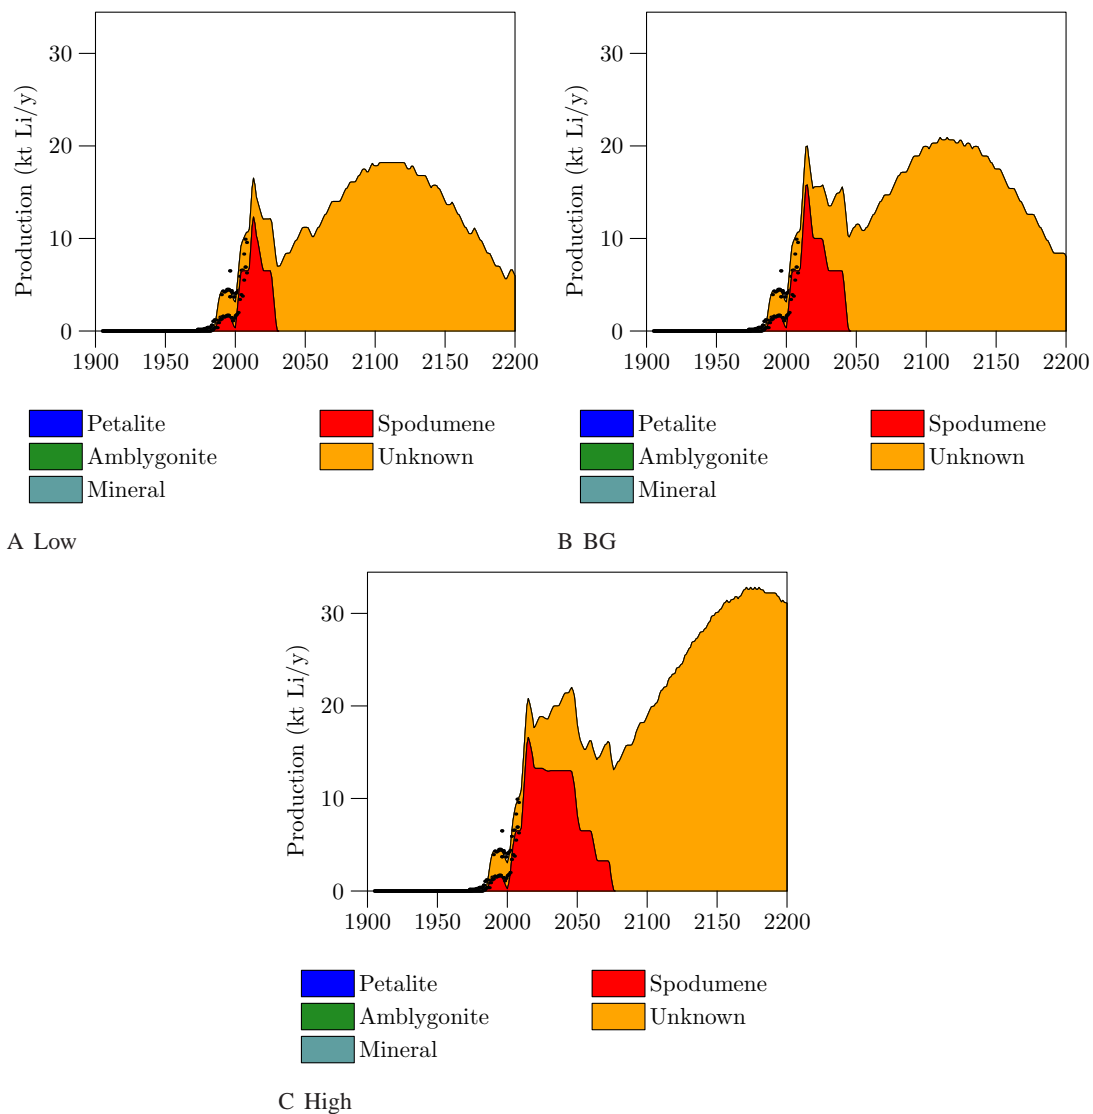

FIGURE 1.12. Scenarios for Asia

TABLE 1.33. Peak years for Asia

| Type        | Peak Year |      |      | Max Production |      |      |
|-------------|-----------|------|------|----------------|------|------|
|             | Low       | BG   | High | Low            | BG   | High |
| Amblygonite | 1962      | 1962 | 1962 | 0.0            | 0.0  | 0.0  |
| Mineral     | 1944      | 1944 | 1944 | 0.0            | 0.0  | 0.0  |
| Petalite    | 1968      | 1968 | 1968 | 0.0            | 0.0  | 0.0  |
| Spodumene   | 2013      | 2015 | 2015 | 12.3           | 15.8 | 16.6 |
| Unknown     | 2112      | 2112 | 2175 | 18.2           | 20.9 | 32.8 |
| Lithium     | 2112      | 2112 | 2175 | 18.2           | 20.9 | 32.8 |



TABLE 1.34. URR values for Asia

| Type        | URR    |        |         |
|-------------|--------|--------|---------|
|             | Low    | BG     | High    |
| Amblygonite | 213.3  | 364.2  | 701.2   |
| Mineral     | 2771.7 | 3330.3 | 6932.6  |
| Petalite    | 0.1    | 0.1    | 0.1     |
| Spodumene   | 213.3  | 364.2  | 701.2   |
| Unknown     | 2771.7 | 3330.3 | 6932.6  |
| Lithium     | 5970.2 | 7389.1 | 15267.7 |

### 1.3. Europe

#### 1.3.1. Austria.

TABLE 1.35. Mining constants for Austria

| Name                   | $Y_s$ | $Q_T$ | $r_{Q_T}$ | $M_L$ | $M_H$ | $L_L$ | $L_H$ | $t_t$ | $r_t$ |
|------------------------|-------|-------|-----------|-------|-------|-------|-------|-------|-------|
| Low Spodumene Koralpe  | 2020  | 10    | 4         | 0.5   | 0.5   | 35    | 35    | NA    | NA    |
| BG Spodumene Koralpe   | 2020  | 10    | 4         | 0.5   | 0.5   | 35    | 35    | NA    | NA    |
| High Spodumene Koralpe | 2020  | 113   | 4         | 5     | 5     | 35    | 35    | NA    | NA    |

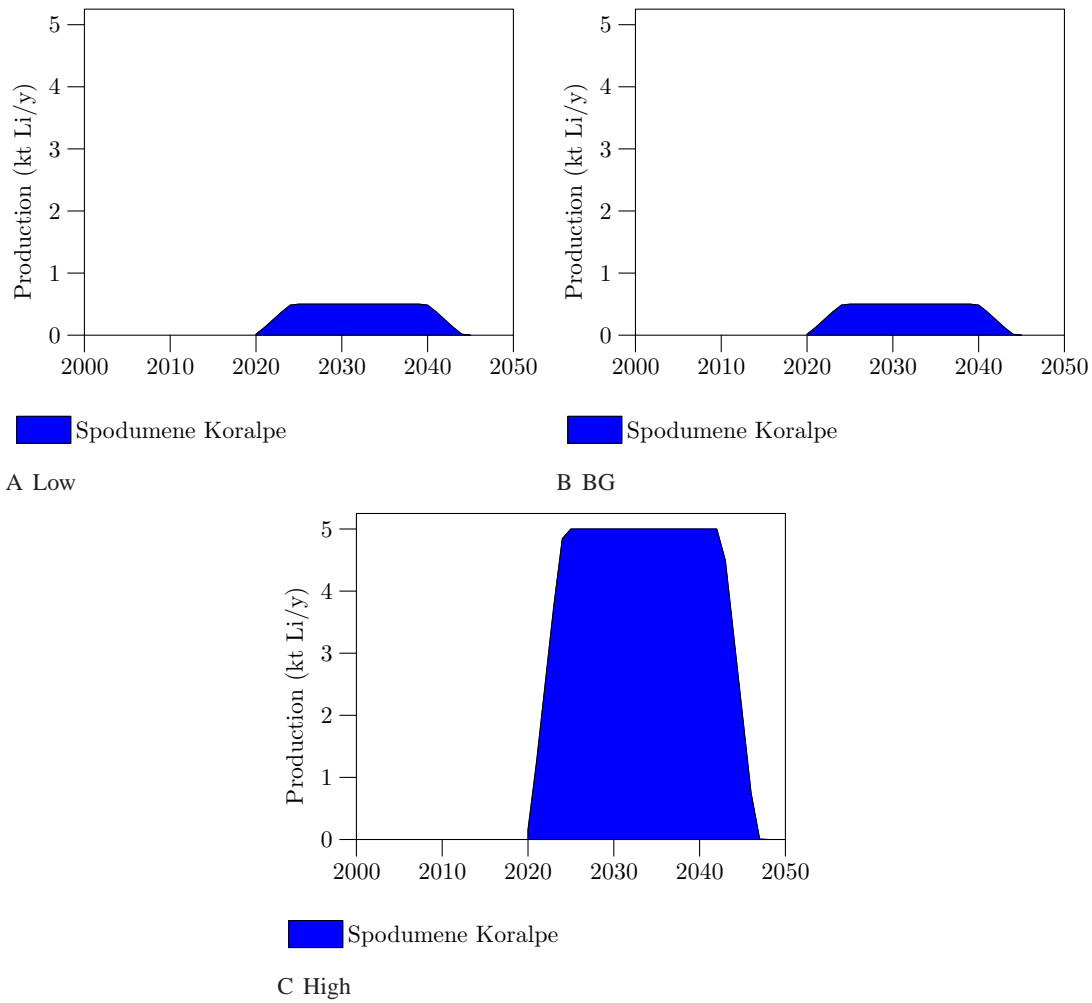

FIGURE 1.13. Scenarios for Austria

TABLE 1.36. Peak years for Austria

| Type              | Peak Year |      |      | Max Production |     |      |
|-------------------|-----------|------|------|----------------|-----|------|
|                   | Low       | BG   | High | Low            | BG  | High |
| Spodumene Koralpe | 2032      | 2032 | 2033 | 0.5            | 0.5 | 5.0  |
| Spodumene Total   | 2032      | 2032 | 2033 | 0.5            | 0.5 | 5.0  |
| Lithium           | 2032      | 2032 | 2033 | 0.5            | 0.5 | 5.0  |

TABLE 1.37. URR values for Austria

| Type              | URR  |      |       |
|-------------------|------|------|-------|
|                   | Low  | BG   | High  |
| Spodumene Koralpe | 10.0 | 10.0 | 113.0 |
| Spodumene Total   | 10.0 | 10.0 | 113.0 |
| Lithium           | 10.0 | 10.0 | 113.0 |

### 1.3.2. Czechoslovakia.

TABLE 1.38. Mining constants for Czechoslovakia

| Name         | $Y_s$ | $Q_T$   | $r_{Q_T}$ | $M_L$  | $M_H$  | $L_L$ | $L_H$ | $t_t$ | $r_t$ |
|--------------|-------|---------|-----------|--------|--------|-------|-------|-------|-------|
| Low Mineral  | 1925  | 0.28e-2 | 2         | 0.5e-2 | 0.5e-2 | 70    | 70    | NA    | NA    |
| BG Mineral   | 1925  | 0.28e-2 | 2         | 0.5e-2 | 0.5e-2 | 70    | 70    | NA    | NA    |
| High Mineral | 1925  | 0.28e-2 | 2         | 0.5e-2 | 0.5e-2 | 70    | 70    | NA    | NA    |

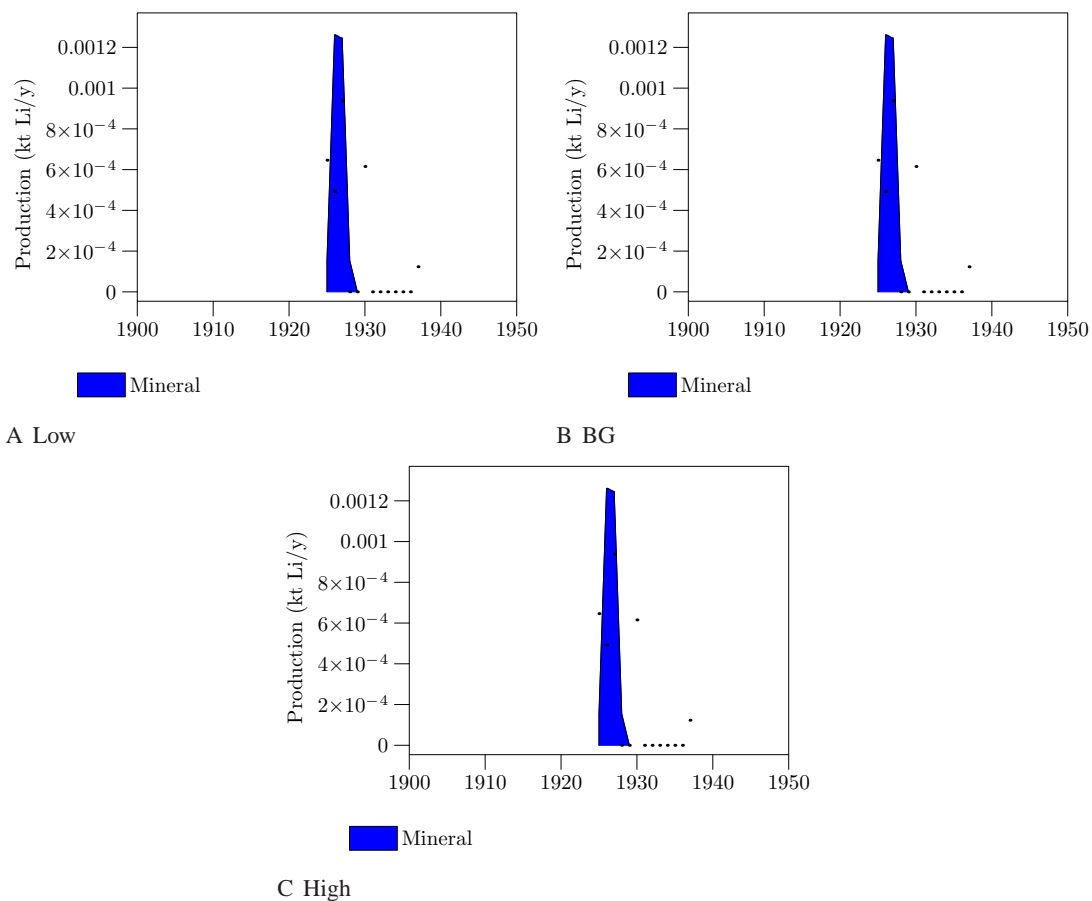

FIGURE 1.14. Scenarios for Czechoslovakia

TABLE 1.39. Peak years for Czechoslovakia

| Type    | Peak Year |      |      | Max Production |     |      |
|---------|-----------|------|------|----------------|-----|------|
|         | Low       | BG   | High | Low            | BG  | High |
| Mineral | 1926      | 1926 | 1926 | 0.0            | 0.0 | 0.0  |
| Lithium | 1926      | 1926 | 1926 | 0.0            | 0.0 | 0.0  |

TABLE 1.40. URR values for Czechoslovakia

| Type    | URR |    |      |
|---------|-----|----|------|
|         | Low | BG | High |
| Mineral | -   | -  | -    |
| Lithium | -   | -  | -    |

### 1.3.3. Finland.

TABLE 1.41. Mining constants for Finland

| Name         | $Y_s$ | $Q_T$ | $r_{Q_T}$ | $M_L$ | $M_H$ | $L_L$ | $L_H$ | $t_t$ | $r_t$ |
|--------------|-------|-------|-----------|-------|-------|-------|-------|-------|-------|
| Low Mineral  | 2010  | 6.4   | 4         | 0.1   | 0.1   | 30    | 30    | NA    | NA    |
| BG Mineral   | 2010  | 15    | 4         | 0.15  | 0.15  | 50    | 50    | NA    | NA    |
| High Mineral | 2010  | 15    | 4         | 0.15  | 0.15  | 50    | 50    | NA    | NA    |

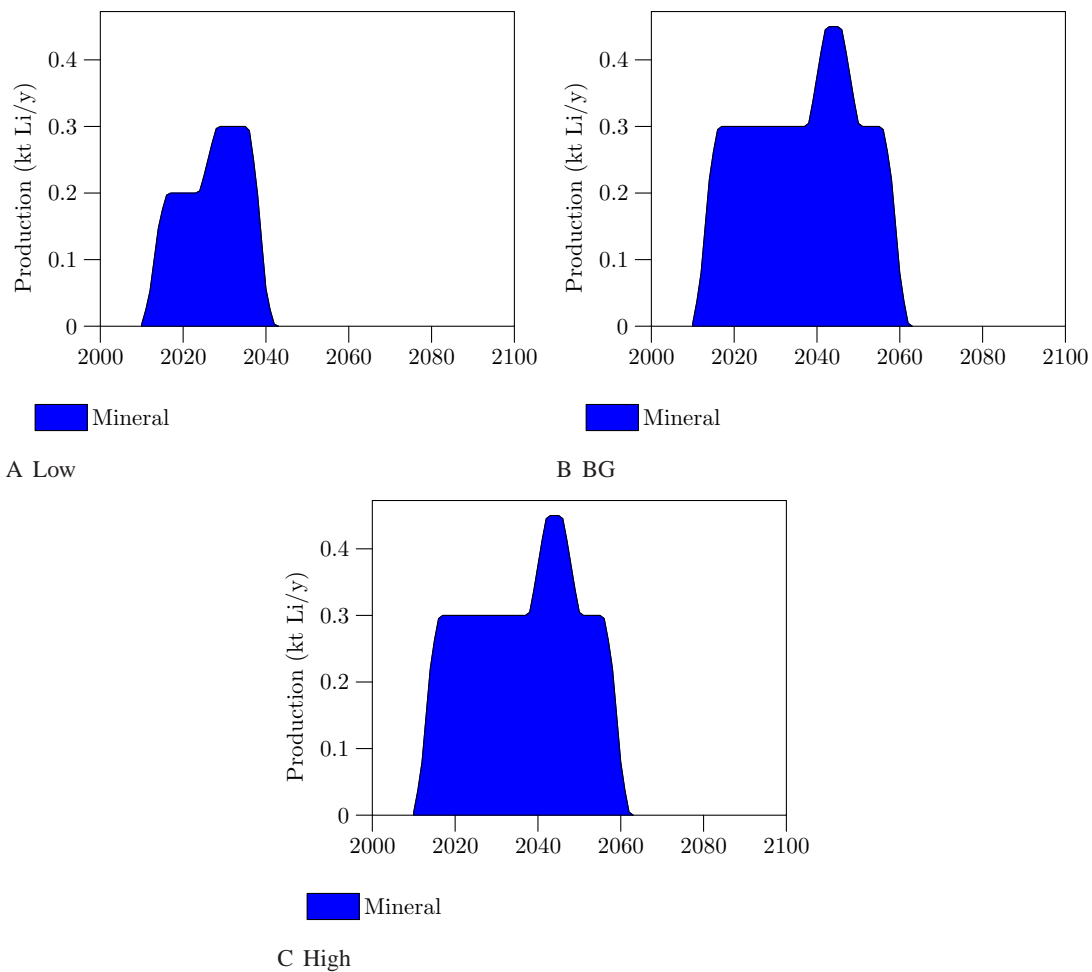

FIGURE 1.15. Scenarios for Finland

TABLE 1.42. Peak years for Finland

| Type    | Peak Year |      |      | Max Production |     |      |
|---------|-----------|------|------|----------------|-----|------|
|         | Low       | BG   | High | Low            | BG  | High |
| Mineral | 2032      | 2044 | 2044 | 0.3            | 0.5 | 0.5  |
| Lithium | 2032      | 2044 | 2044 | 0.3            | 0.5 | 0.5  |

TABLE 1.43. URR values for Finland

| Type    | URR |      |      |
|---------|-----|------|------|
|         | Low | BG   | High |
| Mineral | 6.4 | 15.0 | 15.0 |
| Lithium | 6.4 | 15.0 | 15.0 |

### 1.3.4. France.

TABLE 1.44. Mining constants for France

| Name            | $Y_s$ | $Q_T$   | $r_{Q_T}$ | $M_L$  | $M_H$  | $L_L$ | $L_H$ | $t_t$ | $r_t$ |
|-----------------|-------|---------|-----------|--------|--------|-------|-------|-------|-------|
| Low Lepidolite  | 1928  | 0.54e-1 | 4         | 0.5e-2 | 0.5e-2 | 15    | 15    | NA    | NA    |
| BG Lepidolite   | 1928  | 0.54e-1 | 4         | 0.5e-2 | 0.5e-2 | 15    | 15    | NA    | NA    |
| High Lepidolite | 1928  | 0.54e-1 | 4         | 0.5e-2 | 0.5e-2 | 15    | 15    | NA    | NA    |

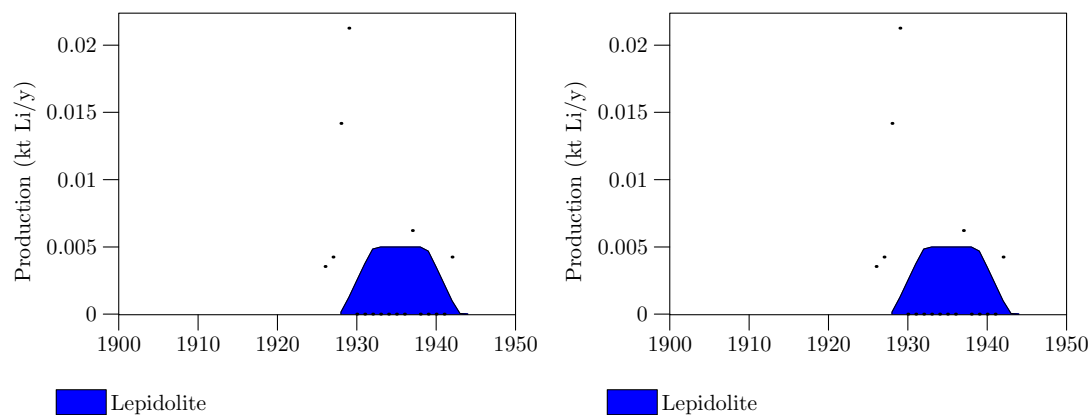

A Low

B BG

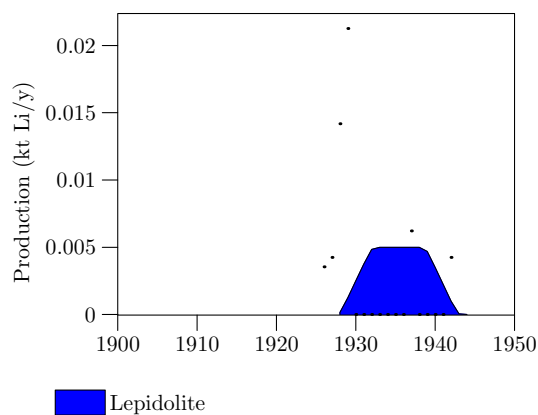

C High

FIGURE 1.16. Scenarios for France

TABLE 1.45. Peak years for France

| Type       | Peak Year |      |      | Max Production |     |      |
|------------|-----------|------|------|----------------|-----|------|
|            | Low       | BG   | High | Low            | BG  | High |
| Lepidolite | 1935      | 1935 | 1935 | 0.0            | 0.0 | 0.0  |
| Lithium    | 1935      | 1935 | 1935 | 0.0            | 0.0 | 0.0  |



TABLE 1.46. URR values for France

| Type       | URR |     |      |
|------------|-----|-----|------|
|            | Low | BG  | High |
| Lepidolite | 0.1 | 0.1 | 0.1  |
| Lithium    | 0.1 | 0.1 | 0.1  |

### 1.3.5. Germany.

TABLE 1.47. Mining constants for Germany

| Name         | $Y_s$ | $Q_T$   | $r_{Q_T}$ | $M_L$  | $M_H$  | $L_L$ | $L_H$ | $t_t$ | $r_t$ |
|--------------|-------|---------|-----------|--------|--------|-------|-------|-------|-------|
| Low Mineral  | 1925  | 0.72e-1 | 4         | 0.2e-1 | 0.2e-1 | 60    | 60    | NA    | NA    |
| BG Mineral   | 1925  | 0.72e-1 | 4         | 0.2e-1 | 0.2e-1 | 60    | 60    | NA    | NA    |
| High Mineral | 1925  | 0.72e-1 | 4         | 0.2e-1 | 0.2e-1 | 60    | 60    | NA    | NA    |

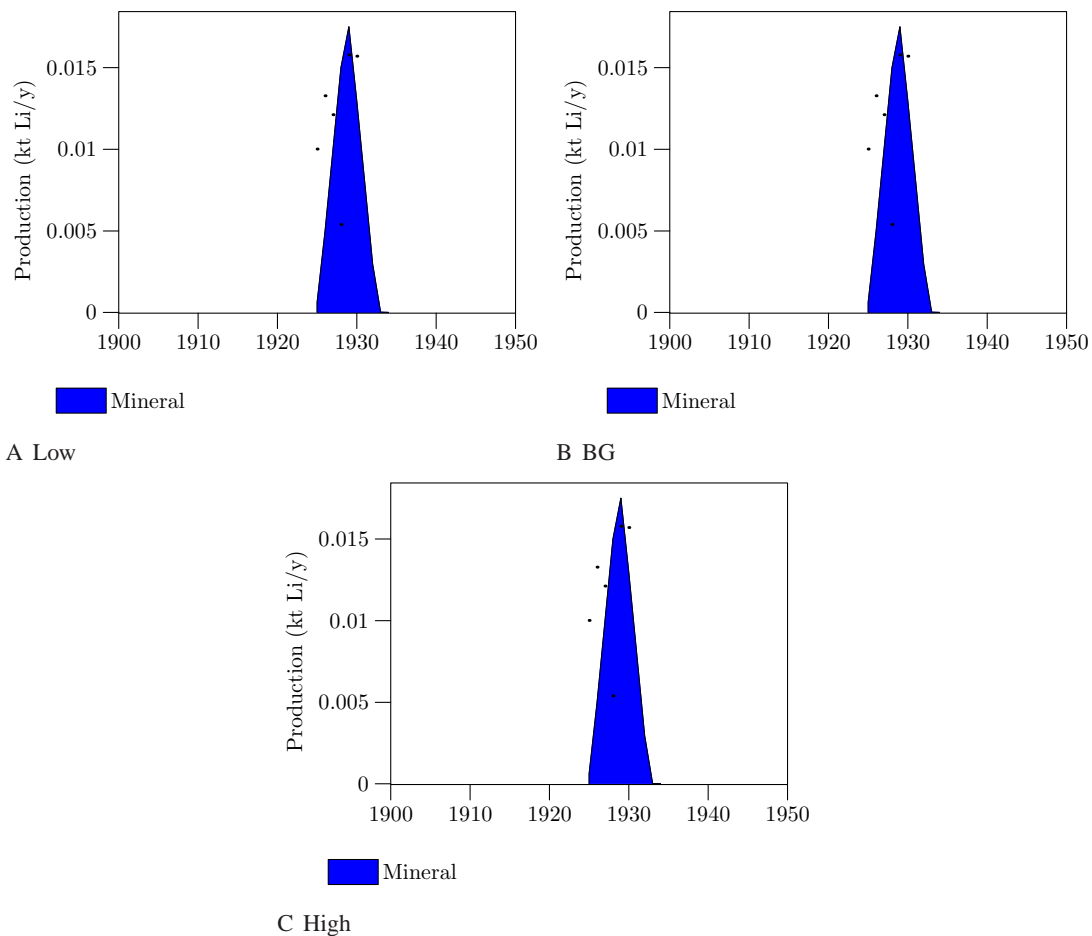

FIGURE 1.17. Scenarios for Germany

TABLE 1.48. Peak years for Germany

| Type    | Peak Year |      |      | Max Production |     |      |
|---------|-----------|------|------|----------------|-----|------|
|         | Low       | BG   | High | Low            | BG  | High |
| Mineral | 1929      | 1929 | 1929 | 0.0            | 0.0 | 0.0  |
| Lithium | 1929      | 1929 | 1929 | 0.0            | 0.0 | 0.0  |

TABLE 1.49. URR values for Germany

| Type    | URR |     |      |
|---------|-----|-----|------|
|         | Low | BG  | High |
| Mineral | 0.1 | 0.1 | 0.1  |
| Lithium | 0.1 | 0.1 | 0.1  |

### 1.3.6. Ireland.

TABLE 1.50. Mining constants for Ireland

| Name         | $Y_s$ | $Q_T$ | $r_{Q_T}$ | $M_L$ | $M_H$ | $L_L$ | $L_H$ | $t_t$ | $r_t$ |
|--------------|-------|-------|-----------|-------|-------|-------|-------|-------|-------|
| High Mineral | 2020  | 13    | 4         | 0.5   | 0.5   | 60    | 60    | NA    | NA    |

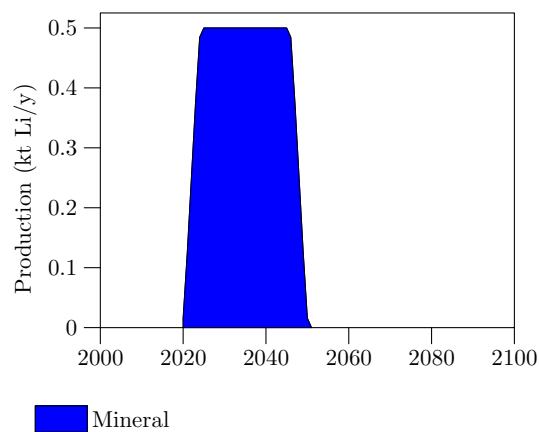

A High

FIGURE 1.18. Scenarios for Ireland

TABLE 1.51. Peak years for Ireland

| Type    | Peak Year |    |      | Max Production |    |      |
|---------|-----------|----|------|----------------|----|------|
|         | Low       | BG | High | Low            | BG | High |
| Mineral |           |    | 2035 |                |    | 0.5  |
| Lithium |           |    | 2035 |                |    | 0.5  |

TABLE 1.52. URR values for Ireland

| Type    | URR |    |      |
|---------|-----|----|------|
|         | Low | BG | High |
| Mineral |     |    | 13.0 |
| Lithium | -   | -  | 13.0 |

## 1.3.7. Portugal.

TABLE 1.53. Mining constants for Portugal

| Name               | $Y_s$ | $Q_T$   | $r_{Q_T}$ | $M_L$  | $M_H$  | $L_L$ | $L_H$ | $t_t$ | $r_t$ |
|--------------------|-------|---------|-----------|--------|--------|-------|-------|-------|-------|
| Low Mineral        | 1988  | 10.738  | 6         | 0.1    | 0.1    | 20    | 20    | NA    | NA    |
| Low Lithiophilite  | 1951  | 0.1e-2  | 4         | 0.3e-2 | 0.3e-2 | 60    | 60    | NA    | NA    |
| Low Amblygonite    | 1925  | 0.31e-1 | 4         | 0.3e-2 | 0.3e-2 | 60    | 60    | NA    | NA    |
| BG Mineral         | 1991  | 15.738  | 6         | 0.1    | 0.1    | 20    | 20    | NA    | NA    |
| BG Lithiophilite   | 1951  | 0.1e-2  | 4         | 0.3e-2 | 0.3e-2 | 60    | 60    | NA    | NA    |
| BG Amblygonite     | 1925  | 0.31e-1 | 4         | 0.3e-2 | 0.3e-2 | 60    | 60    | NA    | NA    |
| High Mineral       | 1991  | 15.738  | 6         | 0.1    | 0.1    | 20    | 20    | NA    | NA    |
| High Lithiophilite | 1951  | 0.1e-2  | 4         | 0.3e-2 | 0.3e-2 | 60    | 60    | NA    | NA    |
| High Amblygonite   | 1925  | 0.31e-1 | 4         | 0.3e-2 | 0.3e-2 | 60    | 60    | NA    | NA    |

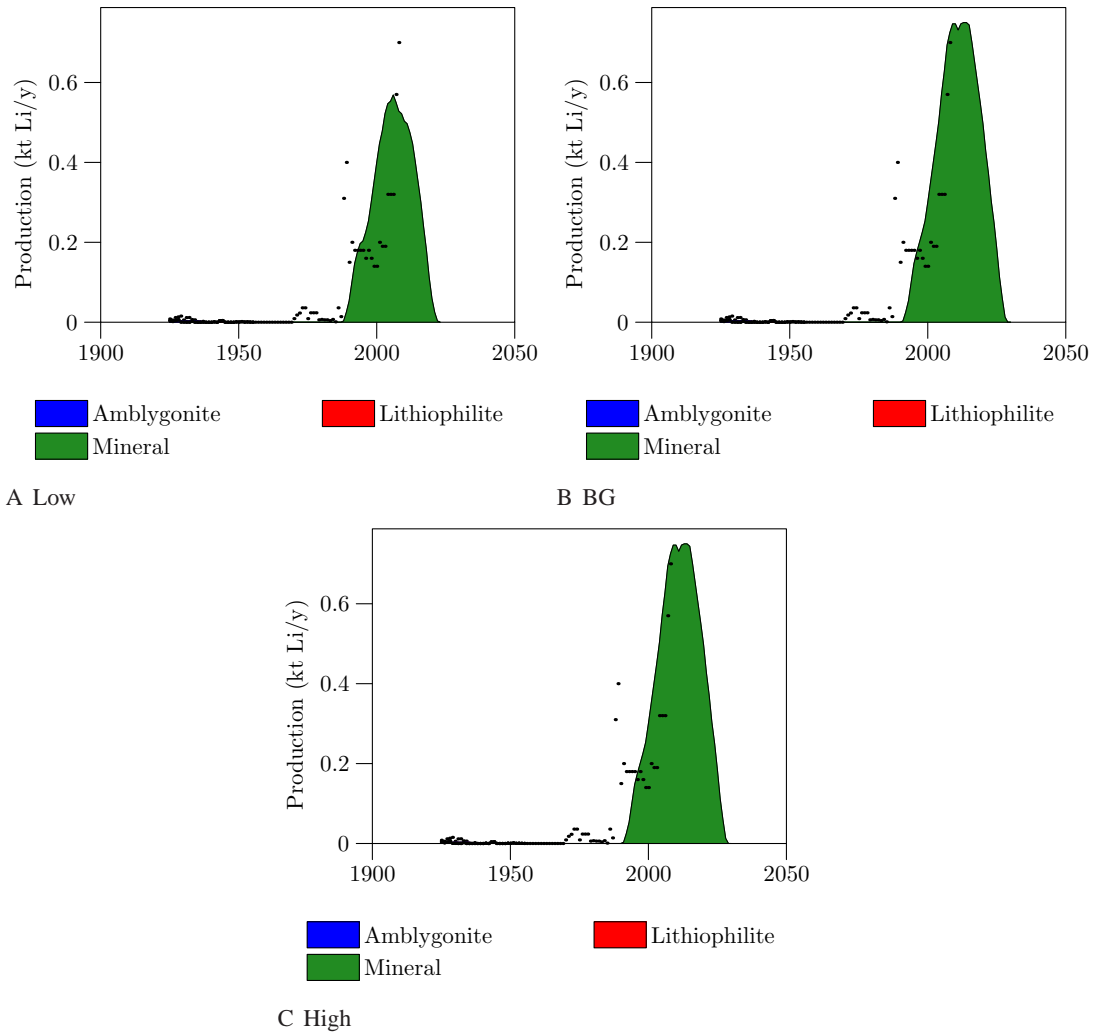

FIGURE 1.19. Scenarios for Portugal

TABLE 1.54. Peak years for Portugal

| Type          | Peak Year |      |      | Max Production |     |      |
|---------------|-----------|------|------|----------------|-----|------|
|               | Low       | BG   | High | Low            | BG  | High |
| Amblygonite   | 1932      | 1932 | 1932 | 0.0            | 0.0 | 0.0  |
| Lithiophilite | 1952      | 1952 | 1952 | 0.0            | 0.0 | 0.0  |
| Mineral       | 2006      | 2013 | 2013 | 0.6            | 0.8 | 0.8  |
| Lithium       | 2006      | 2013 | 2013 | 0.6            | 0.8 | 0.8  |

TABLE 1.55. URR values for Portugal

| Type          | URR  |      |      |
|---------------|------|------|------|
|               | Low  | BG   | High |
| Amblygonite   | -    | -    | -    |
| Lithiophilite | -    | -    | -    |
| Mineral       | 10.7 | 15.7 | 15.7 |
| Lithium       | 10.8 | 15.8 | 15.8 |

## 1.3.8. Serbia.

TABLE 1.56. Mining constants for Serbia

| Name          | $Y_s$ | $Q_T$ | $r_{Q_T}$ | $M_L$ | $M_H$ | $L_L$ | $L_H$ | $t_t$ | $r_t$ |
|---------------|-------|-------|-----------|-------|-------|-------|-------|-------|-------|
| Low Jadarite  | 2020  | 425   | 4         | 8.37  | 8.37  | 60    | 60    | NA    | NA    |
| BG Jadarite   | 2020  | 425   | 4         | 8.37  | 8.37  | 60    | 60    | NA    | NA    |
| High Jadarite | 2020  | 990   | 4         | 8.37  | 8.37  | 125   | 125   | NA    | NA    |

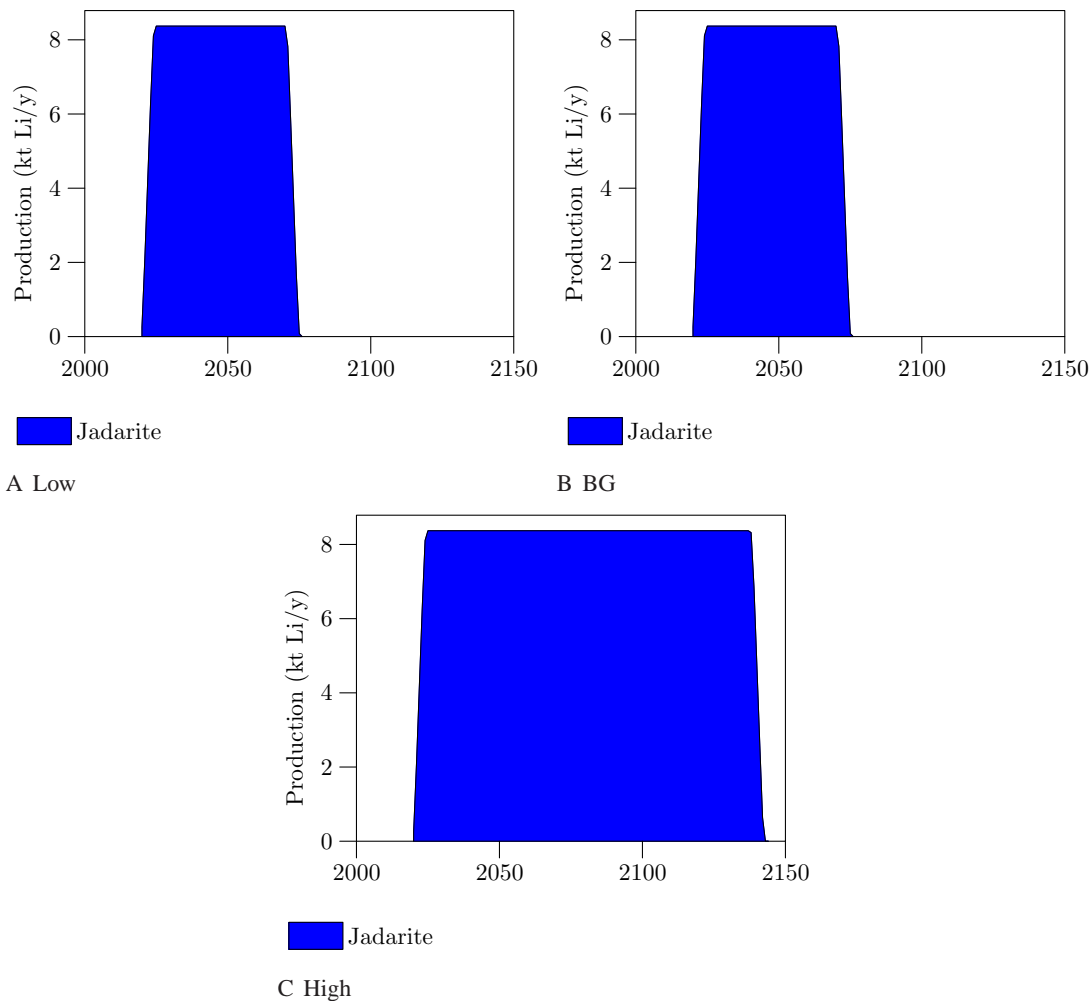

FIGURE 1.20. Scenarios for Serbia

TABLE 1.57. Peak years for Serbia

| Type     | Peak Year |      |      | Max Production |     |      |
|----------|-----------|------|------|----------------|-----|------|
|          | Low       | BG   | High | Low            | BG  | High |
| Jadarite | 2047      | 2047 | 2081 | 8.4            | 8.4 | 8.4  |
| Lithium  | 2047      | 2047 | 2081 | 8.4            | 8.4 | 8.4  |

TABLE 1.58. URR values for Serbia

| Type     | URR   |       |       |
|----------|-------|-------|-------|
|          | Low   | BG    | High  |
| Jadarite | 425.0 | 425.0 | 990.0 |
| Lithium  | 425.0 | 425.0 | 990.0 |



## 1.3.9. Spain.

TABLE 1.59. Mining constants for Spain

| Name             | $Y_s$ | $Q_T$   | $r_{Q_T}$ | $M_L$   | $M_H$   | $L_L$ | $L_H$ | $t_t$ | $r_t$ |
|------------------|-------|---------|-----------|---------|---------|-------|-------|-------|-------|
| Low Lepidolite   | 2002  | 0.69    | 4         | 0.12    | 0.12    | 60    | 60    | NA    | NA    |
| Low Amblygonite  | 1944  | 0.42e-1 | 4         | 0.15e-1 | 0.15e-1 | 60    | 60    | NA    | NA    |
| BG Lepidolite    | 2002  | 0.69    | 4         | 0.12    | 0.12    | 60    | 60    | NA    | NA    |
| BG Amblygonite   | 1944  | 0.42e-1 | 4         | 0.15e-1 | 0.15e-1 | 60    | 60    | NA    | NA    |
| High Lepidolite  | 2002  | 72.69   | 4         | 0.6e-1  | 0.6e-1  | 50    | 50    | NA    | NA    |
| High Amblygonite | 1944  | 0.42e-1 | 4         | 0.15e-1 | 0.15e-1 | 60    | 60    | NA    | NA    |

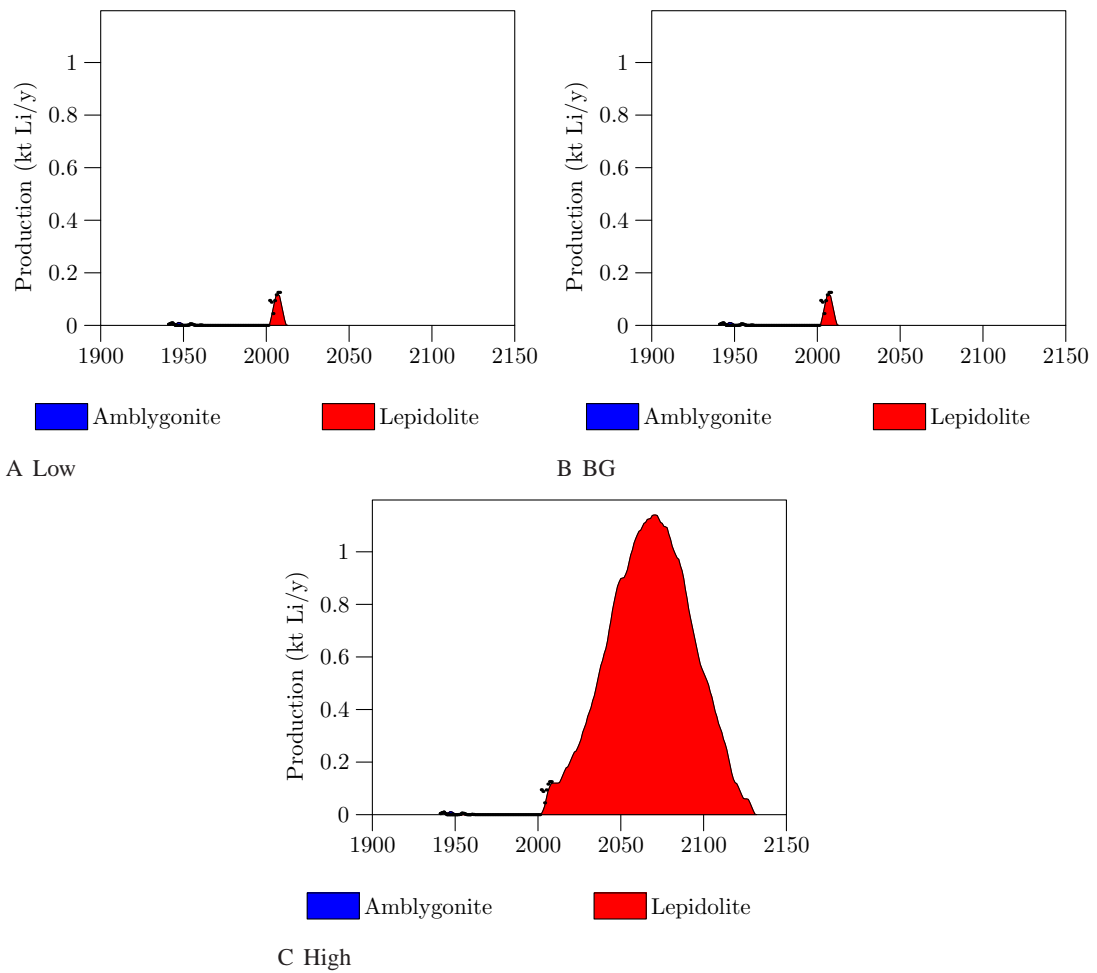

FIGURE 1.21. Scenarios for Spain

TABLE 1.60. Peak years for Spain

| Type        | Peak Year |      |      | Max Production |     |      |
|-------------|-----------|------|------|----------------|-----|------|
|             | Low       | BG   | High | Low            | BG  | High |
| Amblygonite | 1947      | 1947 | 1947 | 0.0            | 0.0 | 0.0  |
| Lepidolite  | 2007      | 2007 | 2070 | 0.1            | 0.1 | 1.1  |
| Lithium     | 2007      | 2007 | 2070 | 0.1            | 0.1 | 1.1  |

TABLE 1.61. URR values for Spain

| Type        | URR |     |      |
|-------------|-----|-----|------|
|             | Low | BG  | High |
| Amblygonite | -   | -   | -    |
| Lepidolite  | 0.7 | 0.7 | 72.7 |
| Lithium     | 0.7 | 0.7 | 72.7 |

## 1.3.10. Sweden.

TABLE 1.62. Mining constants for Sweden

| Name           | $Y_s$ | $Q_T$   | $r_{Q_T}$ | $M_L$  | $M_H$  | $L_L$ | $L_H$ | $t_t$ | $r_t$ |
|----------------|-------|---------|-----------|--------|--------|-------|-------|-------|-------|
| Low Spodumene  | 1938  | 0.26e-1 | 4         | 0.5e-2 | 0.5e-2 | 60    | 60    | NA    | NA    |
| Low Petalite   | 1938  | 0.18e-1 | 4         | 0.5e-2 | 0.5e-2 | 60    | 60    | NA    | NA    |
| BG Spodumene   | 1938  | 0.26e-1 | 4         | 0.5e-2 | 0.5e-2 | 60    | 60    | NA    | NA    |
| BG Petalite    | 1938  | 0.18e-1 | 4         | 0.5e-2 | 0.5e-2 | 60    | 60    | NA    | NA    |
| High Spodumene | 1938  | 0.26e-1 | 4         | 0.5e-2 | 0.5e-2 | 60    | 60    | NA    | NA    |
| High Petalite  | 1938  | 0.18e-1 | 4         | 0.5e-2 | 0.5e-2 | 60    | 60    | NA    | NA    |

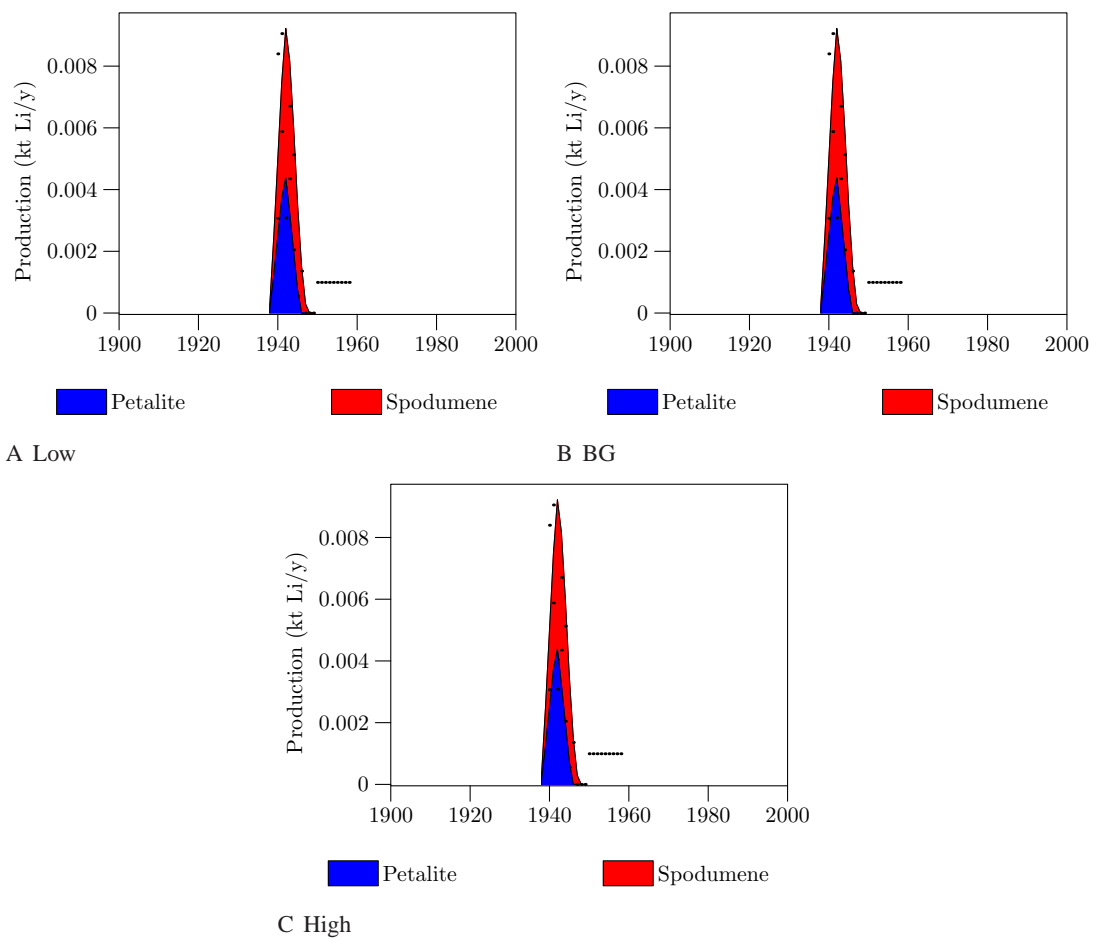

FIGURE 1.22. Scenarios for Sweden

TABLE 1.63. Peak years for Sweden

| Type      | Peak Year |      |      | Max Production |     |      |
|-----------|-----------|------|------|----------------|-----|------|
|           | Low       | BG   | High | Low            | BG  | High |
| Petalite  | 1942      | 1942 | 1942 | 0.0            | 0.0 | 0.0  |
| Spodumene | 1943      | 1943 | 1943 | 0.0            | 0.0 | 0.0  |
| Lithium   | 1942      | 1942 | 1942 | 0.0            | 0.0 | 0.0  |

TABLE 1.64. URR values for Sweden

| Type      | URR |    |      |
|-----------|-----|----|------|
|           | Low | BG | High |
| Petalite  | -   | -  | -    |
| Spodumene | -   | -  | -    |
| Lithium   | -   | -  | -    |

1.3.11. Europe.

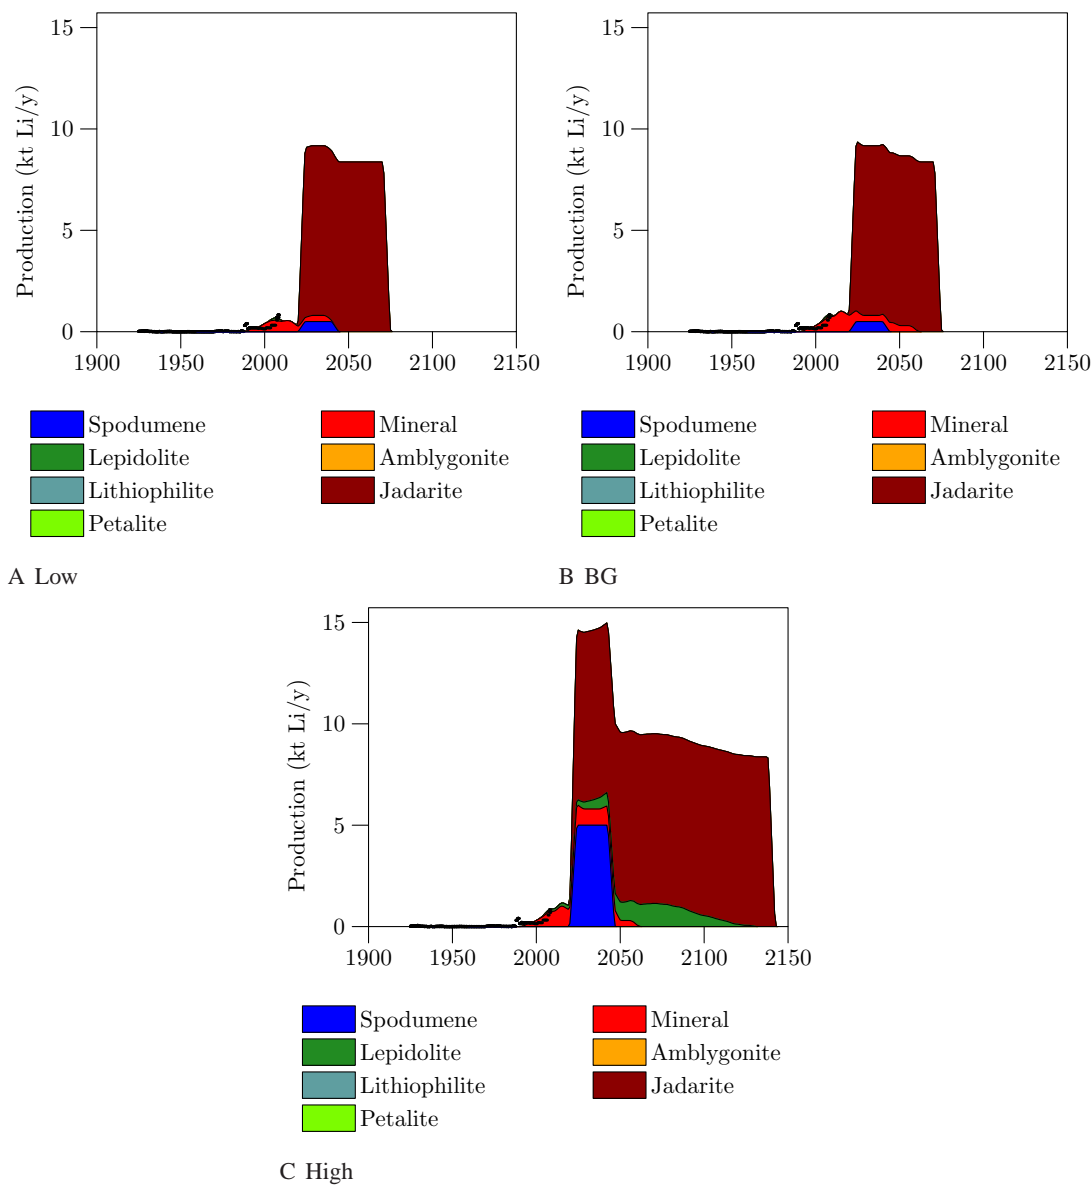

FIGURE 1.23. Scenarios for Europe

TABLE 1.65. Peak years for Europe

| Type          | Peak Year |      |      | Max Production |     |      |
|---------------|-----------|------|------|----------------|-----|------|
|               | Low       | BG   | High | Low            | BG  | High |
| Amblygonite   | 1947      | 1947 | 1947 | 0.0            | 0.0 | 0.0  |
| Jadarite      | 2047      | 2047 | 2081 | 8.4            | 8.4 | 8.4  |
| Lepidolite    | 2007      | 2007 | 2070 | 0.1            | 0.1 | 1.1  |
| Lithiophilite | 1952      | 1952 | 1952 | 0.0            | 0.0 | 0.0  |
| Mineral       | 2006      | 2015 | 2024 | 0.6            | 1.0 | 1.0  |
| Petalite      | 1942      | 1942 | 1942 | 0.0            | 0.0 | 0.0  |
| Spodumene     | 2032      | 2032 | 2033 | 0.5            | 0.5 | 5.0  |
| Lithium       | 2032      | 2025 | 2042 | 9.2            | 9.4 | 15.0 |

TABLE 1.66. URR values for Europe

| Type          | URR    |        |        |
|---------------|--------|--------|--------|
|               | Low    | BG     | High   |
| Amblygonite   | 28.1   | 41.7   | 229.7  |
| Jadarite      | 453.1  | 466.7  | 1219.7 |
| Lepidolite    | 28.0   | 41.6   | 229.6  |
| Lithiophilite | 28.1   | 41.7   | 229.7  |
| Mineral       | 27.2   | 40.8   | 156.8  |
| Petalite      | 453.1  | 466.7  | 1219.7 |
| Spodumene     | 10.0   | 10.0   | 113.0  |
| Lithium       | 1027.5 | 1109.1 | 3398.1 |

## 1.4. FSU

## 1.4.1. FSU.

TABLE 1.67. Mining constants for FSU

| Name           | $Y_s$ | $Q_T$  | $r_{Q_T}$ | $M_L$ | $M_H$ | $L_L$ | $L_H$ | $t_t$ | $r_t$ |
|----------------|-------|--------|-----------|-------|-------|-------|-------|-------|-------|
| Low Mineral 1  | 1975  | 49.775 | 4         | 2     | 2     | 60    | 60    | NA    | NA    |
| Low Mineral 2  | 2015  | 130    | 4         | 2     | 2     | 70    | 70    | NA    | NA    |
| BG Mineral 1   | 1975  | 49.775 | 4         | 2     | 2     | 60    | 60    | NA    | NA    |
| BG Mineral 2   | 2015  | 130    | 4         | 2     | 2     | 70    | 70    | NA    | NA    |
| High Mineral 1 | 1975  | 49.775 | 4         | 2     | 2     | 60    | 60    | NA    | NA    |
| High Mineral 2 | 2015  | 2480   | 4         | 2     | 2     | 60    | 60    | NA    | NA    |

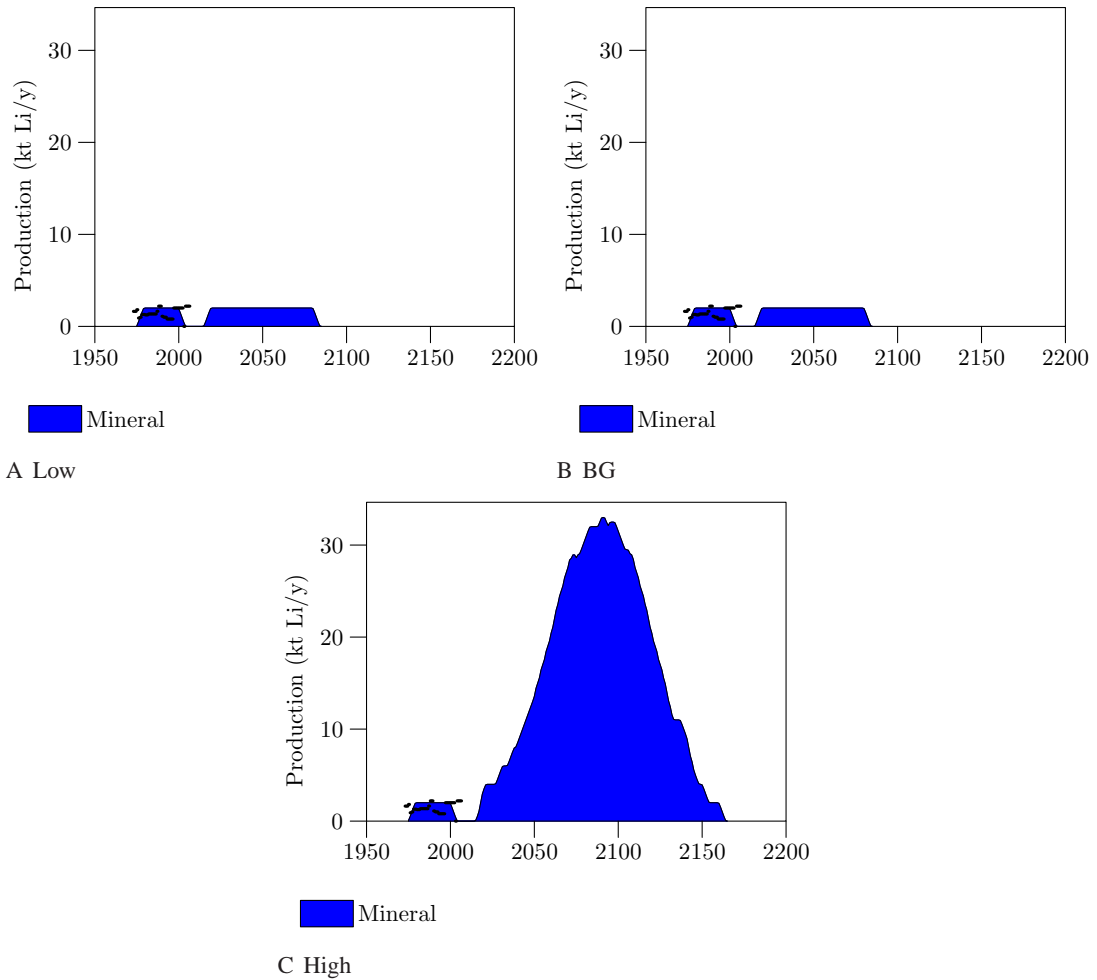

FIGURE 1.24. Scenarios for FSU

TABLE 1.68. Peak years for FSU

| Type    | Peak Year |      |      | Max Production |     |      |
|---------|-----------|------|------|----------------|-----|------|
|         | Low       | BG   | High | Low            | BG  | High |
| Mineral | 2029      | 2029 | 2091 | 2.0            | 2.0 | 33.0 |
| Lithium | 2029      | 2029 | 2091 | 2.0            | 2.0 | 33.0 |

TABLE 1.69. URR values for FSU

| Type    | URR   |       |        |
|---------|-------|-------|--------|
|         | Low   | BG    | High   |
| Mineral | 179.8 | 179.8 | 2529.8 |
| Lithium | 179.8 | 179.8 | 2529.8 |



## 1.4.2. FSU.

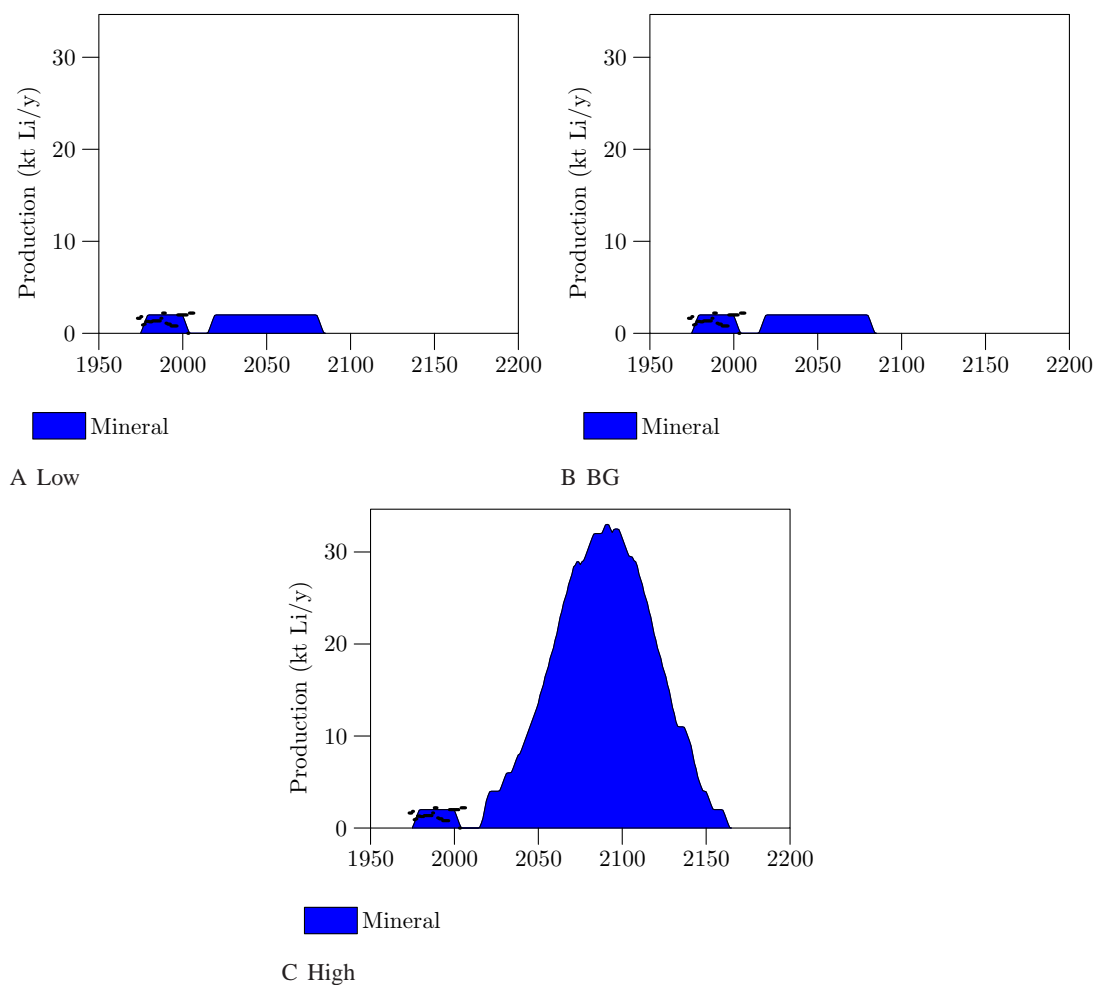

FIGURE 1.25. Scenarios for FSU

TABLE 1.70. Peak years for FSU

| Type    | Peak Year |      |      | Max Production |     |      |
|---------|-----------|------|------|----------------|-----|------|
|         | Low       | BG   | High | Low            | BG  | High |
| Mineral | 2029      | 2029 | 2091 | 2.0            | 2.0 | 33.0 |
| Lithium | 2029      | 2029 | 2091 | 2.0            | 2.0 | 33.0 |

TABLE 1.71. URR values for FSU

| Type    | URR   |       |        |
|---------|-------|-------|--------|
|         | Low   | BG    | High   |
| Mineral | 179.8 | 179.8 | 2529.8 |
| Lithium | 179.8 | 179.8 | 2529.8 |

## 1.5. Middle East

### 1.5.1. Israel.

TABLE 1.72. Mining constants for Israel

| Name                | $Y_s$ | $Q_T$ | $r_{Q_T}$ | $M_L$ | $M_H$ | $L_L$ | $L_H$ | $t_t$ | $r_t$ |
|---------------------|-------|-------|-----------|-------|-------|-------|-------|-------|-------|
| High Brine Dead Sea | 2030  | 900   | 4         | 2     | 2     | 60    | 60    | NA    | NA    |

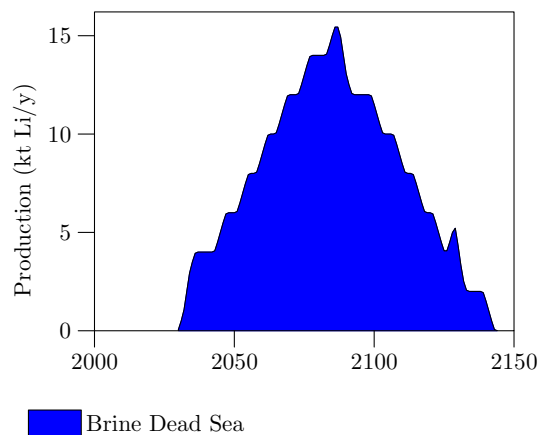

A High

FIGURE 1.26. Scenarios for Israel

TABLE 1.73. Peak years for Israel

| Type           | Peak Year |    |      | Max Production |    |      |
|----------------|-----------|----|------|----------------|----|------|
|                | Low       | BG | High | Low            | BG | High |
| Brine Dead Sea |           |    | 2086 |                |    | 15.4 |
| Brine Total    |           |    | 2086 |                |    | 15.4 |
| Lithium        |           |    | 2086 |                |    | 15.4 |

TABLE 1.74. URR values for Israel

| Type           | URR |    |       |
|----------------|-----|----|-------|
|                | Low | BG | High  |
| Brine Dead Sea |     |    | 900.0 |
| Brine Total    | -   | -  | 900.0 |
| Lithium        | -   | -  | 900.0 |

### 1.5.2. Middle East.

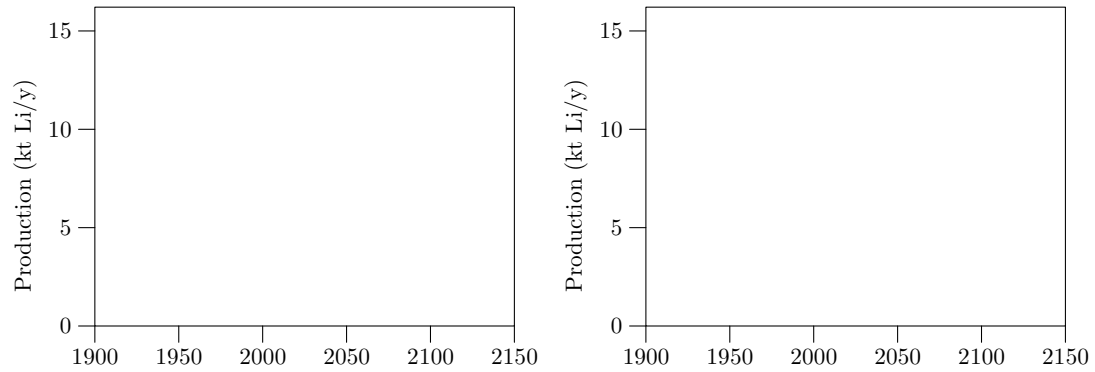

A Low

B BG

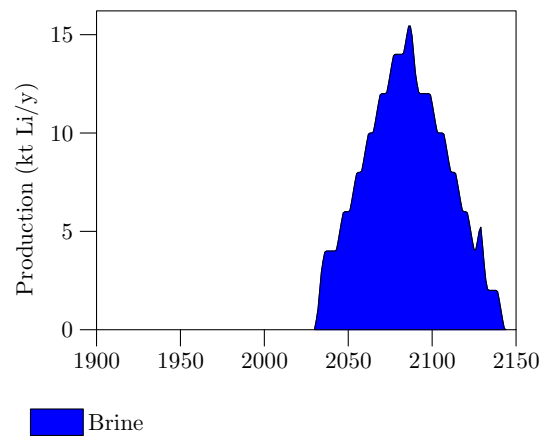

C High

FIGURE 1.27. Scenarios for Middle East

TABLE 1.75. Peak years for Middle East

| Type    | Peak Year |    |      | Max Production |    |      |
|---------|-----------|----|------|----------------|----|------|
|         | Low       | BG | High | Low            | BG | High |
| Brine   |           |    | 2086 |                |    | 15.4 |
| Lithium |           |    | 2086 |                |    | 15.4 |

TABLE 1.76. URR values for Middle East

| Type    | URR |    |       |
|---------|-----|----|-------|
|         | Low | BG | High  |
| Brine   |     |    | 900.0 |
| Lithium | -   | -  | 900.0 |

## 1.6. North America

### 1.6.1. Canada.

TABLE 1.77. Mining constants for Canada

| Name                          | $Y_s$ | $Q_T$  | $r_{Q_T}$ | $M_L$ | $M_H$ | $L_L$ | $L_H$ | $t_t$ | $r_t$ |
|-------------------------------|-------|--------|-----------|-------|-------|-------|-------|-------|-------|
| Low Oilfield Brine Fox Creek  | 2025  | 257.5  | 4         | 1     | 1     | 60    | 60    | NA    | NA    |
| Low Mineral Sep. Rapids       | 2020  | 36.1   | 4         | 0.5   | 0.5   | 35    | 35    | NA    | NA    |
| Low Spodumene La Motte        | 2020  | 11.3   | 4         | 0.37  | 0.37  | 35    | 35    | NA    | NA    |
| Low Spodumene La Corne        | 2012  | 53     | 4         | 3.6   | 3.6   | 20    | 20    | NA    | NA    |
| Low Mineral Wekusko           | 2025  | 13     | 4         | 0.7   | 0.7   | 25    | 25    | NA    | NA    |
| Low Mineral Old Mines         | 1955  | 5.520  | 4         | 0.7   | 0.7   | 60    | 60    | NA    | NA    |
| Low Spodumene Bernic Lake 1   | 1986  | 14.364 | 4         | 0.7   | 0.7   | 60    | 60    | NA    | NA    |
| Low Spodumene Bernic Lake 2   | 2020  | 9.3    | 4         | 0.7   | 0.7   | 60    | 60    | NA    | NA    |
| BG Oilfield Brine Fox Creek   | 2025  | 257.5  | 4         | 1     | 1     | 60    | 60    | NA    | NA    |
| BG Mineral Sep. Rapids        | 2020  | 56     | 4         | 0.5   | 0.5   | 35    | 35    | NA    | NA    |
| BG Spodumene La Motte         | 2020  | 23     | 4         | 0.7   | 0.7   | 40    | 40    | NA    | NA    |
| BG Spodumene La Corne         | 2012  | 163.3  | 4         | 3.6   | 3.6   | 60    | 60    | NA    | NA    |
| BG Mineral Wekusko            | 2025  | 54     | 4         | 1.5   | 1.5   | 40    | 40    | NA    | NA    |
| BG Mineral Old Mines          | 1955  | 5.520  | 4         | 0.7   | 0.7   | 60    | 60    | NA    | NA    |
| BG Spodumene Bernic Lake 1    | 1986  | 14.364 | 4         | 0.7   | 0.7   | 60    | 60    | NA    | NA    |
| BG Spodumene Bernic Lake 2    | 2020  | 18.6   | 4         | 0.7   | 0.7   | 60    | 60    | NA    | NA    |
| High Oilfield Brine Fox Creek | 2025  | 515    | 4         | 2     | 2     | 60    | 60    | NA    | NA    |
| High Mineral Yellowknife      | 2025  | 65     | 4         | 1.2   | 1.2   | 60    | 60    | NA    | NA    |
| High Mineral Sep. Rapids      | 2020  | 56     | 4         | 0.5   | 0.5   | 35    | 35    | NA    | NA    |
| High Spodumene La Motte       | 2020  | 23     | 4         | 0.7   | 0.7   | 40    | 40    | NA    | NA    |
| High Spodumene La Corne       | 2012  | 163.3  | 4         | 3.6   | 3.6   | 60    | 60    | NA    | NA    |
| High Mineral Wekusko          | 2025  | 54     | 4         | 1.5   | 1.5   | 40    | 40    | NA    | NA    |
| High Mineral Old Mines        | 1955  | 5.520  | 4         | 0.7   | 0.7   | 60    | 60    | NA    | NA    |
| High Spodumene Bernic Lake 1  | 1986  | 14.364 | 4         | 0.7   | 0.7   | 60    | 60    | NA    | NA    |
| High Spodumene Bernic Lake 2  | 2020  | 18.6   | 4         | 0.7   | 0.7   | 60    | 60    | NA    | NA    |

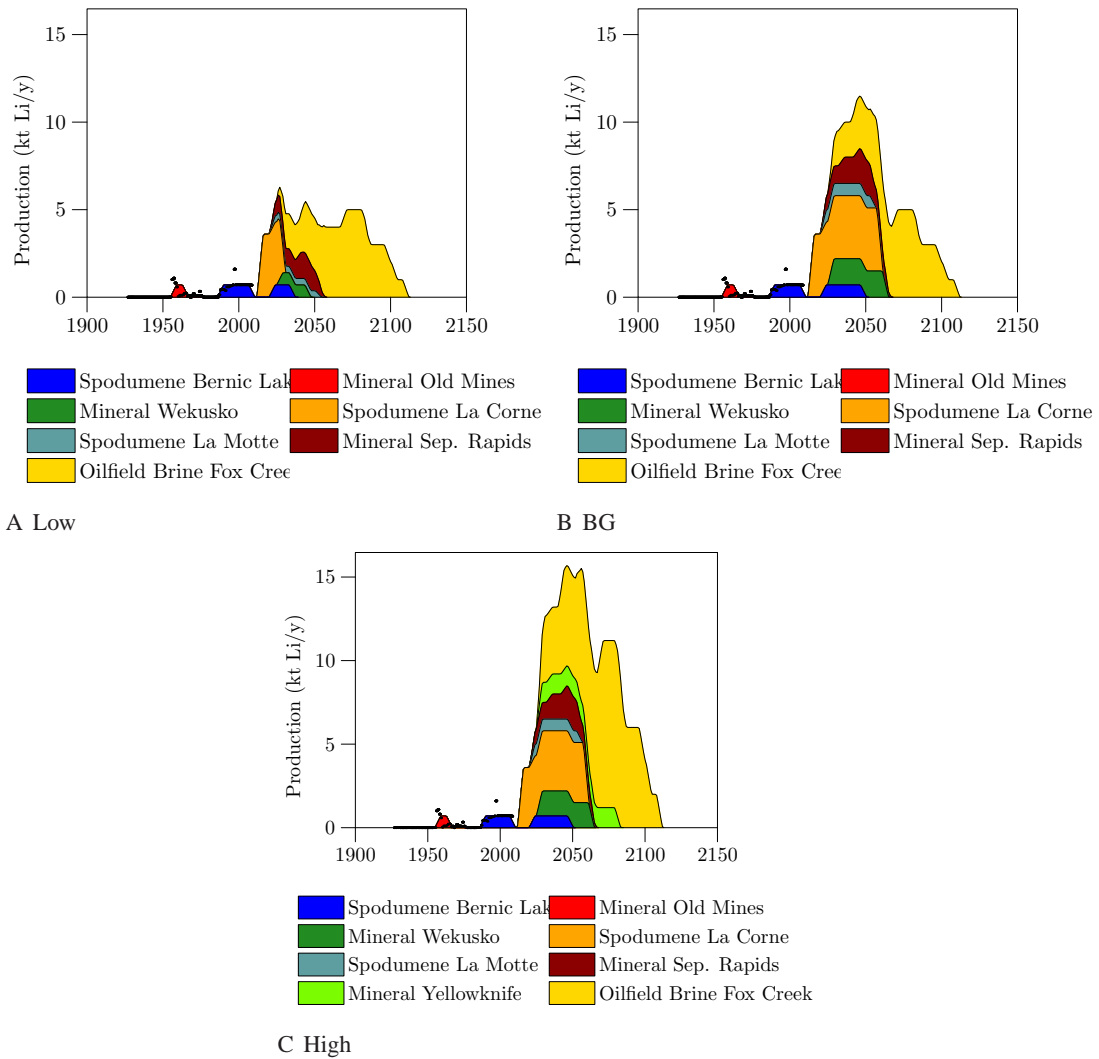

FIGURE 1.28. Scenarios for Canada

TABLE 1.78. Peak years for Canada

| Type                     | Peak Year |      |      | Max Production |      |      |
|--------------------------|-----------|------|------|----------------|------|------|
|                          | Low       | BG   | High | Low            | BG   | High |
| Mineral Old Mines        | 1961      | 1961 | 1961 | 0.7            | 0.7  | 0.7  |
| Mineral Sep. Rapids      | 2044      | 2048 | 2048 | 1.5            | 2.0  | 2.0  |
| Mineral Wekusko          | 2036      | 2045 | 2045 | 0.7            | 1.5  | 1.5  |
| Mineral Yellowknife      |           |      | 2054 |                |      | 1.2  |
| Mineral Total            | 2042      | 2048 | 2048 | 2.2            | 3.5  | 4.7  |
| Oilfield Brine Fox Creek | 2076      | 2076 | 2076 | 5.0            | 5.0  | 10.0 |
| Oilfield Brine Total     | 2076      | 2076 | 2076 | 5.0            | 5.0  | 10.0 |
| Spodumene Bernic Lake    | 2011      | 2018 | 2018 | 0.7            | 0.7  | 0.7  |
| Spodumene La Corne       | 2021      | 2036 | 2036 | 3.6            | 3.6  | 3.6  |
| Spodumene La Motte       | 2037      | 2038 | 2038 | 0.4            | 0.7  | 0.7  |
| Spodumene Total          | 2025      | 2035 | 2035 | 4.7            | 5.0  | 5.0  |
| Lithium                  | 2027      | 2046 | 2046 | 6.3            | 11.5 | 15.7 |

TABLE 1.79. URR values for Canada

| Type                     | URR   |       |       |
|--------------------------|-------|-------|-------|
|                          | Low   | BG    | High  |
| Mineral Old Mines        | 5.5   | 5.5   | 5.5   |
| Mineral Sep. Rapids      | 36.1  | 56.0  | 56.0  |
| Mineral Wekusko          | 13.0  | 54.0  | 54.0  |
| Mineral Yellowknife      |       |       | 65.0  |
| Mineral Total            | 54.6  | 115.5 | 180.5 |
| Oilfield Brine Fox Creek | 257.5 | 257.5 | 515.0 |
| Oilfield Brine Total     | 257.5 | 257.5 | 515.0 |
| Spodumene Bernic Lake    | 23.7  | 33.0  | 33.0  |
| Spodumene La Corne       | 53.0  | 163.3 | 163.3 |
| Spodumene La Motte       | 11.3  | 23.0  | 23.0  |
| Spodumene Total          | 88.0  | 219.3 | 219.3 |
| Lithium                  | 400.1 | 592.3 | 914.8 |

**1.6.2. USA.**

TABLE 1.80. Mining constants for USA

| Name                          | $Y_s$ | $Q_T$   | $r_{Q_T}$ | $M_L$ | $M_H$ | $L_L$ | $L_H$ | $t_t$ | $r_t$   |
|-------------------------------|-------|---------|-----------|-------|-------|-------|-------|-------|---------|
| Low Hectorite McDermitt       | 2014  | 1000    | 1         | 2.6   | 5     | 20    | 60    | 2060  | 0.37e-1 |
| Low Oilfield Brine Smackover  | 2035  | 450     | 3         | 10    | 10    | 60    | 60    | NA    | NA      |
| Low Spodumene NC Undev        | 2050  | 1000    | 3         | 2.5   | 2.5   | 60    | 60    | NA    | NA      |
| Low Spodumene NC Dev          | 2030  | 230     | 3         | 5     | 5     | 60    | 60    | NA    | NA      |
| Low Brine Salton Sea          | 2025  | 316     | 3         | 1.5   | 1.5   | 60    | 60    | NA    | NA      |
| Low Brine Great Salt Lake     | 2020  | 236.7   | 3         | 0.2   | 0.5   | 40    | 80    | 2060  | 0.37e-1 |
| Low Brine Silver Peak         | 2008  | 18      | 6         | 0.7   | 0.7   | 70    | 70    | NA    | NA      |
| Low Unknown Historic          | 1950  | 164.528 | 6         | 1     | 1     | 50    | 50    | NA    | NA      |
| BG Hectorite McDermitt        | 2014  | 1000    | 1         | 2.6   | 5     | 20    | 60    | 2060  | 0.37e-1 |
| BG Oilfield Brine Smackover   | 2035  | 500     | 3         | 10    | 10    | 60    | 60    | NA    | NA      |
| BG Spodumene NC Undev         | 2050  | 1000    | 3         | 2.5   | 2.5   | 60    | 60    | NA    | NA      |
| BG Spodumene NC Dev           | 2030  | 230     | 3         | 5     | 5     | 60    | 60    | NA    | NA      |
| BG Brine Salton Sea           | 2025  | 316     | 3         | 1.5   | 1.5   | 60    | 60    | NA    | NA      |
| BG Brine Great Salt Lake      | 2030  | 260     | 3         | 0.2   | 0.5   | 40    | 80    | 2060  | 0.37e-1 |
| BG Brine Silver Peak          | 2008  | 20      | 6         | 0.7   | 0.7   | 70    | 70    | NA    | NA      |
| BG Unknown Historic           | 1950  | 164.528 | 6         | 1     | 1     | 50    | 50    | NA    | NA      |
| High Hectorite McDermitt      | 2014  | 2000    | 1         | 2.6   | 5     | 20    | 60    | 2060  | 0.37e-1 |
| High Oilfield Brine Smackover | 2035  | 750     | 3         | 7     | 7     | 60    | 60    | NA    | NA      |
| High Spodumene NC             | 2050  | 5454    | 3         | 2.5   | 2.5   | 60    | 60    | NA    | NA      |
| High Brine Salton Sea         | 2025  | 1316    | 3         | 3     | 3     | 60    | 60    | NA    | NA      |
| High Brine Great Salt Lake    | 2030  | 260     | 3         | 0.2   | 0.5   | 40    | 80    | 2060  | 0.37e-1 |
| High Brine Searles Lake       | 2020  | 14      | 6         | 0.5   | 0.5   | 70    | 70    | NA    | NA      |
| High Brine Silver Peak        | 2008  | 300     | 6         | 0.35  | 0.35  | 70    | 70    | NA    | NA      |
| High Unknown Historic         | 1950  | 164.528 | 6         | 1     | 1     | 50    | 50    | NA    | NA      |

TABLE 1.81. Peak years for USA

| Type                     | Peak Year |      |      | Max Production |      |      |
|--------------------------|-----------|------|------|----------------|------|------|
|                          | Low       | BG   | High | Low            | BG   | High |
| Brine Great Salt Lake    | 2099      | 2100 | 2100 | 2.6            | 2.7  | 2.7  |
| Brine Salton Sea         | 2074      | 2074 | 2077 | 6.0            | 6.0  | 18.0 |
| Brine Searles Lake       |           |      | 2036 |                |      | 0.5  |
| Brine Silver Peak        | 2023      | 2024 | 2073 | 0.7            | 0.7  | 4.6  |
| Brine Total              | 2076      | 2080 | 2074 | 8.4            | 8.0  | 24.5 |
| Hectorite McDermitt      | 2079      | 2079 | 2078 | 11.4           | 11.4 | 14.7 |
| Hectorite Total          | 2079      | 2079 | 2078 | 11.4           | 11.4 | 14.7 |
| Oilfield Brine Smackover | 2059      | 2062 | 2064 | 10.0           | 10.0 | 14.0 |
| Oilfield Brine Total     | 2059      | 2062 | 2064 | 10.0           | 10.0 | 14.0 |
| Spodumene NC             |           |      | 2148 |                |      | 59.3 |
| Spodumene NC Dev         | 2055      | 2055 |      | 5.0            | 5.0  |      |
| Spodumene NC Undev       | 2103      | 2103 |      | 15.0           | 15.0 |      |
| Spodumene Total          | 2103      | 2103 | 2148 | 15.0           | 15.0 | 59.3 |
| Unknown Historic         | 1986      | 1986 | 1986 | 4.0            | 4.0  | 4.0  |
| Unknown Total            | 1986      | 1986 | 1986 | 4.0            | 4.0  | 4.0  |
| Lithium                  | 2078      | 2078 | 2140 | 40.8           | 40.4 | 79.3 |

TABLE 1.82. URR values for USA

| Type                     | URR    |        |         |
|--------------------------|--------|--------|---------|
|                          | Low    | BG     | High    |
| Brine Great Salt Lake    | 236.7  | 260.0  | 260.0   |
| Brine Salton Sea         | 316.0  | 316.0  | 1316.0  |
| Brine Searles Lake       |        |        | 14.0    |
| Brine Silver Peak        | 18.0   | 20.0   | 300.0   |
| Brine Total              | 570.7  | 596.0  | 1890.0  |
| Hectorite McDermitt      | 1000.0 | 1000.0 | 2000.0  |
| Hectorite Total          | 1000.0 | 1000.0 | 2000.0  |
| Oilfield Brine Smackover | 450.0  | 500.0  | 750.0   |
| Oilfield Brine Total     | 450.0  | 500.0  | 750.0   |
| Spodumene NC             |        |        | 5454.0  |
| Spodumene NC Dev         | 230.0  | 230.0  |         |
| Spodumene NC Undev       | 1000.0 | 1000.0 |         |
| Spodumene Total          | 1230.0 | 1230.0 | 5454.0  |
| Unknown Historic         | 164.5  | 164.5  | 164.5   |
| Unknown Total            | 164.5  | 164.5  | 164.5   |
| Lithium                  | 3415.2 | 3490.5 | 10258.5 |



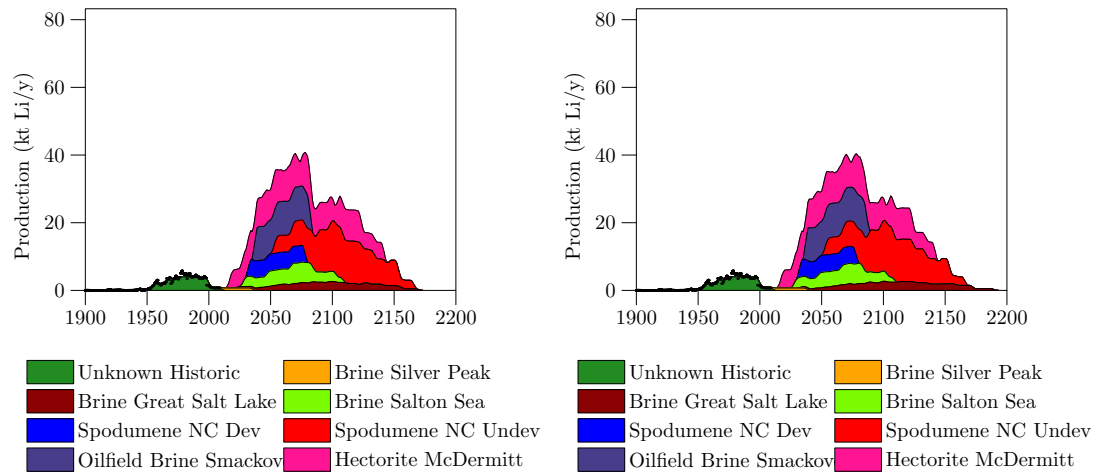

A Low

B BG

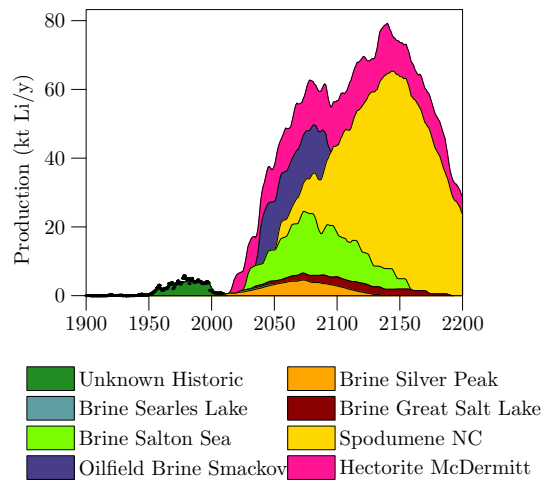

C High

FIGURE 1.29. Scenarios for USA

### 1.6.3. North America.

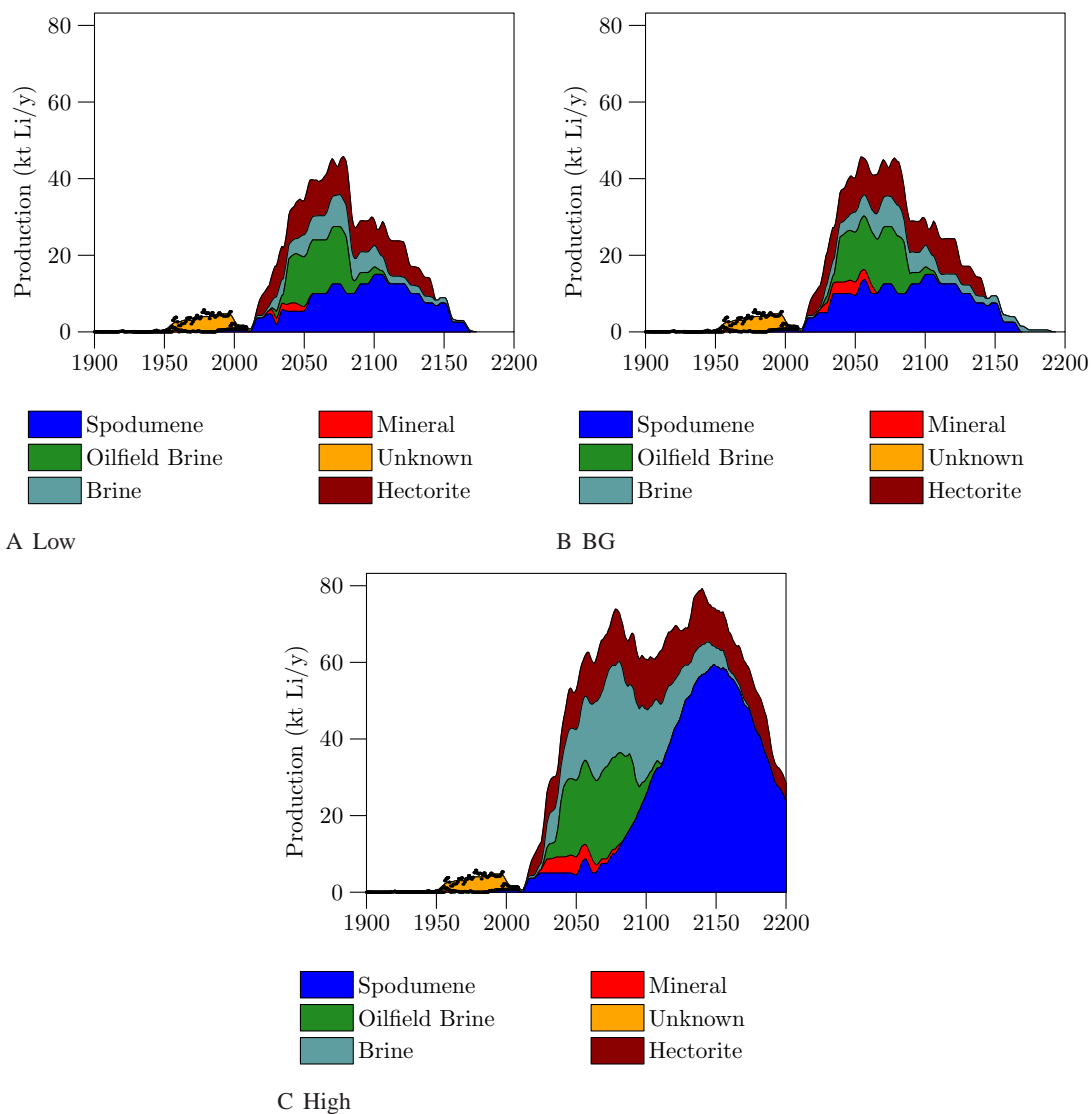

FIGURE 1.30. Scenarios for North America

TABLE 1.83. Peak years for North America

| Type           | Peak Year |      |      | Max Production |      |      |
|----------------|-----------|------|------|----------------|------|------|
|                | Low       | BG   | High | Low            | BG   | High |
| Brine          | 2076      | 2080 | 2074 | 8.4            | 8.0  | 24.5 |
| Hectorite      | 2079      | 2079 | 2078 | 11.4           | 11.4 | 14.7 |
| Mineral        | 2042      | 2048 | 2048 | 2.2            | 3.5  | 4.7  |
| Oilfield Brine | 2075      | 2076 | 2076 | 15.0           | 15.0 | 24.0 |
| Spodumene      | 2103      | 2103 | 2148 | 15.0           | 15.0 | 59.3 |
| Unknown        | 1986      | 1986 | 1986 | 4.0            | 4.0  | 4.0  |
| Lithium        | 2078      | 2054 | 2140 | 45.8           | 45.7 | 79.3 |

TABLE 1.84. URR values for North America

| Type           | URR     |         |         |
|----------------|---------|---------|---------|
|                | Low     | BG      | High    |
| Brine          | 2815.3  | 3082.8  | 9173.3  |
| Hectorite      | 3815.3  | 4082.8  | 11173.3 |
| Mineral        | 1372.6  | 1564.8  | 5853.8  |
| Oilfield Brine | 2080.1  | 2322.3  | 7118.8  |
| Spodumene      | 1318.0  | 1449.3  | 5673.3  |
| Unknown        | 2244.6  | 2486.8  | 7283.3  |
| Lithium        | 13645.9 | 14988.8 | 46275.8 |

1.7. Recycle

1.7.1. Recycle.

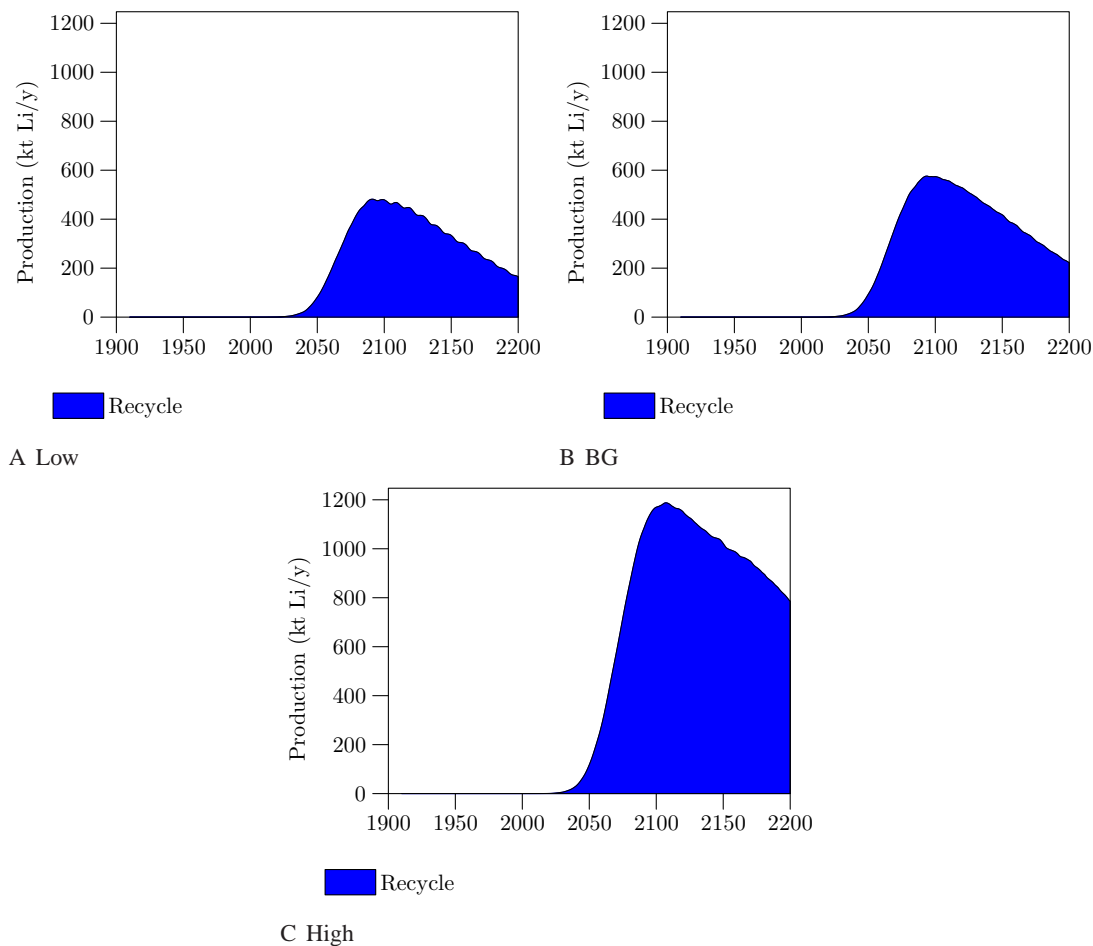

FIGURE 1.31. Scenarios for Recycle

TABLE 1.85. Peak years for Recycle

| Type    | Peak Year |      |      | Max Production |       |        |
|---------|-----------|------|------|----------------|-------|--------|
|         | Low       | BG   | High | Low            | BG    | High   |
| Recycle | 2091      | 2094 | 2107 | 481.7          | 576.0 | 1187.8 |
| Lithium | 2091      | 2094 | 2107 | 481.7          | 576.0 | 1187.8 |

TABLE 1.86. URR values for Recycle

| Type    | URR     |         |          |
|---------|---------|---------|----------|
|         | Low     | BG      | High     |
| Recycle | 55331.7 | 70107.4 | 191901.9 |
| Lithium | 55331.7 | 70107.4 | 191901.9 |

### 1.7.2. Recycle.

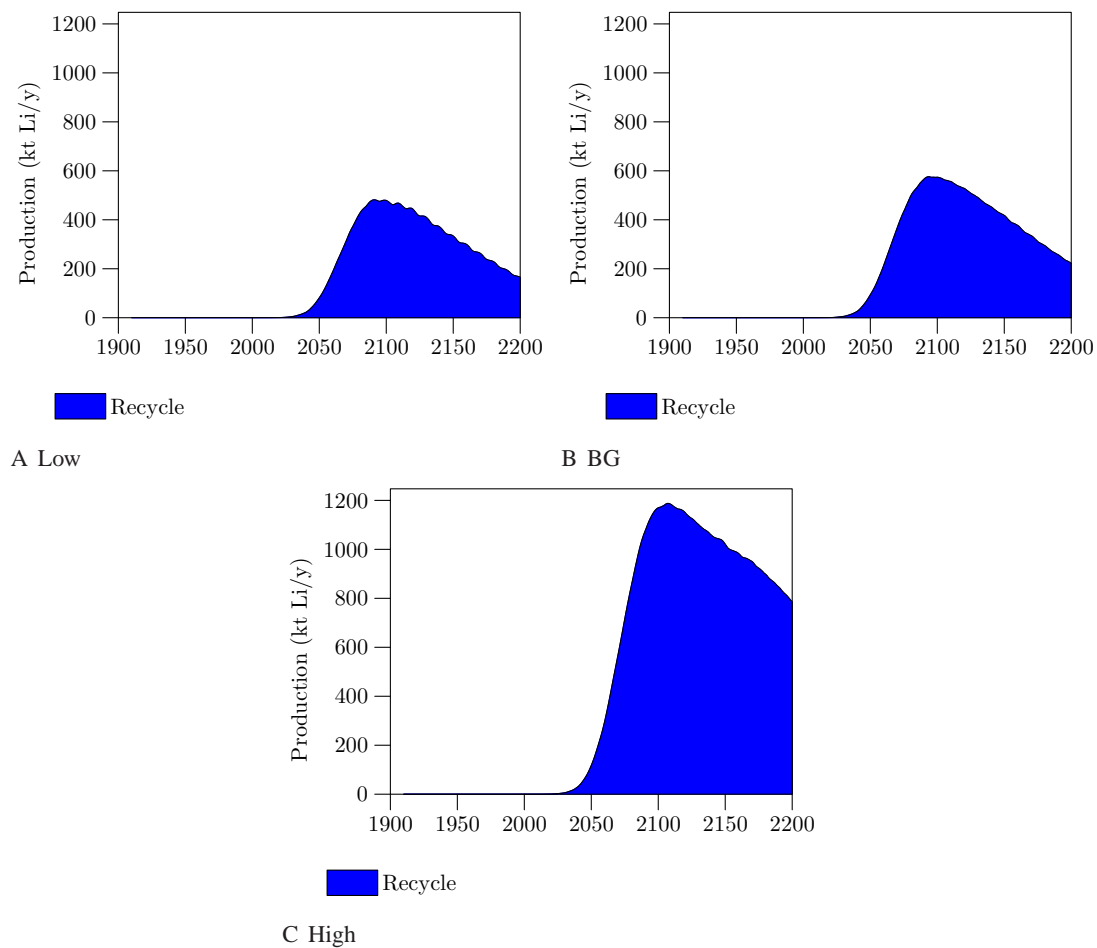

FIGURE 1.32. Scenarios for Recycle

TABLE 1.87. Peak years for Recycle

| Type    | Peak Year |      |      | Max Production |       |        |
|---------|-----------|------|------|----------------|-------|--------|
|         | Low       | BG   | High | Low            | BG    | High   |
| Recycle | 2091      | 2094 | 2107 | 481.7          | 576.0 | 1187.8 |
| Lithium | 2091      | 2094 | 2107 | 481.7          | 576.0 | 1187.8 |

TABLE 1.88. URR values for Recycle

| Type    | URR     |         |          |
|---------|---------|---------|----------|
|         | Low     | BG      | High     |
| Recycle | 55331.7 | 70107.4 | 191901.9 |
| Lithium | 55331.7 | 70107.4 | 191901.9 |

## 1.8. South America

### 1.8.1. Argentina.

TABLE 1.89. Mining constants for Argentina

| Name                     | $Y_s$ | $Q_T$   | $r_{Q_T}$ | $M_L$  | $M_H$  | $L_L$ | $L_H$ | $t_t$ | $r_t$ |
|--------------------------|-------|---------|-----------|--------|--------|-------|-------|-------|-------|
| Low Brine Cauchari       | 2011  | 463     | 4         | 7      | 7      | 90    | 90    | NA    | NA    |
| Low Brine Olaroz         | 2012  | 140     | 4         | 2.82   | 2.82   | 90    | 90    | NA    | NA    |
| Low Brine Rincon         | 2011  | 841.500 | 4         | 3      | 3      | 75    | 75    | NA    | NA    |
| Low Brine Hombre Muerto  | 2001  | 382.680 | 4         | 1.5    | 1.5    | 75    | 75    | NA    | NA    |
| Low Mineral              | 1955  | 0.298   | 4         | 0.9e-2 | 0.9e-2 | 50    | 50    | NA    | NA    |
| BG Brine Cauchari        | 2011  | 463     | 4         | 7      | 7      | 90    | 90    | NA    | NA    |
| BG Brine Olaroz          | 2012  | 140     | 4         | 2.82   | 2.82   | 90    | 90    | NA    | NA    |
| BG Brine Rincon          | 2011  | 1400    | 4         | 5      | 5      | 75    | 75    | NA    | NA    |
| BG Brine Hombre Muerto   | 2001  | 415.93  | 4         | 1.5    | 1.5    | 75    | 75    | NA    | NA    |
| BG Mineral               | 1955  | 0.298   | 4         | 0.9e-2 | 0.9e-2 | 50    | 50    | NA    | NA    |
| High Brine Cauchari      | 2011  | 463     | 4         | 7      | 7      | 90    | 90    | NA    | NA    |
| High Brine Olaroz        | 2012  | 300     | 4         | 1.41   | 1.41   | 70    | 70    | NA    | NA    |
| High Brine Rincon        | 2011  | 1400    | 4         | 5      | 5      | 75    | 75    | NA    | NA    |
| High Brine Hombre Muerto | 2001  | 865.930 | 1         | 1.5    | 1.5    | 75    | 75    | NA    | NA    |
| High Mineral             | 1955  | 0.298   | 4         | 0.9e-2 | 0.9e-2 | 50    | 50    | NA    | NA    |

TABLE 1.90. Peak years for Argentina

| Type                | Peak Year |      |      | Max Production |      |      |
|---------------------|-----------|------|------|----------------|------|------|
|                     | Low       | BG   | High | Low            | BG   | High |
| Brine Cauchari      | 2046      | 2046 | 2046 | 7.0            | 7.0  | 7.0  |
| Brine Hombre Muerto | 2059      | 2057 | 2073 | 6.0            | 6.0  | 6.4  |
| Brine Olaroz        | 2039      | 2039 | 2070 | 2.8            | 2.8  | 5.6  |
| Brine Rincon        | 2067      | 2067 | 2067 | 12.0           | 20.0 | 20.0 |
| Brine Total         | 2057      | 2057 | 2073 | 27.8           | 35.8 | 39.0 |
| Mineral             | 1973      | 1973 | 1973 | 0.0            | 0.0  | 0.0  |
| Lithium             | 2057      | 2057 | 2073 | 27.8           | 35.8 | 39.0 |

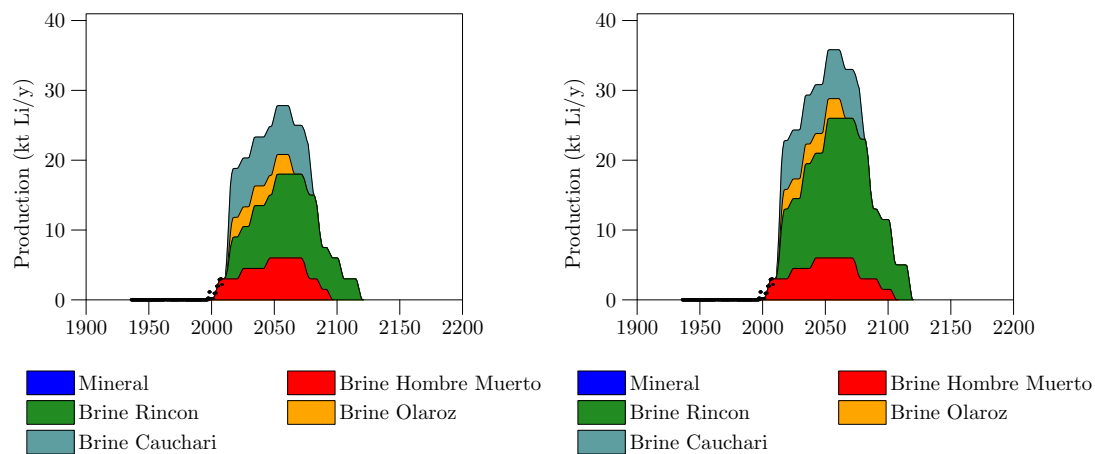

A Low

B BG

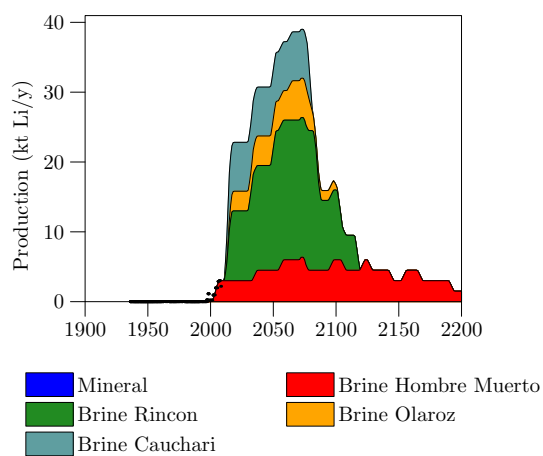

C High

FIGURE 1.33. Scenarios for Argentina

TABLE 1.91. URR values for Argentina

| Type                | URR    |        |        |
|---------------------|--------|--------|--------|
|                     | Low    | BG     | High   |
| Brine Cauchari      | 463.0  | 463.0  | 463.0  |
| Brine Hombre Muerto | 382.7  | 415.9  | 865.9  |
| Brine Olaroz        | 140.0  | 140.0  | 300.0  |
| Brine Rincon        | 841.5  | 1400.0 | 1400.0 |
| Brine Total         | 1827.2 | 2418.9 | 3028.9 |
| Mineral             | 0.3    | 0.3    | 0.3    |
| Lithium             | 1827.5 | 2419.2 | 3029.2 |



## 1.8.2. Bolivia.

TABLE 1.92. Mining constants for Bolivia

| Name             | $Y_s$ | $Q_T$ | $r_{Q_T}$ | $M_L$ | $M_H$ | $L_L$ | $L_H$ | $t_t$ | $r_t$ |
|------------------|-------|-------|-----------|-------|-------|-------|-------|-------|-------|
| Low Brine Uyuni  | 2014  | 2475  | 4         | 2.5   | 2.5   | 100   | 100   | NA    | NA    |
| BG Brine Uyuni   | 2014  | 3560  | 4         | 2.5   | 2.5   | 100   | 100   | NA    | NA    |
| High Brine Uyuni | 2014  | 10200 | 4         | 2.5   | 2.5   | 100   | 100   | NA    | NA    |

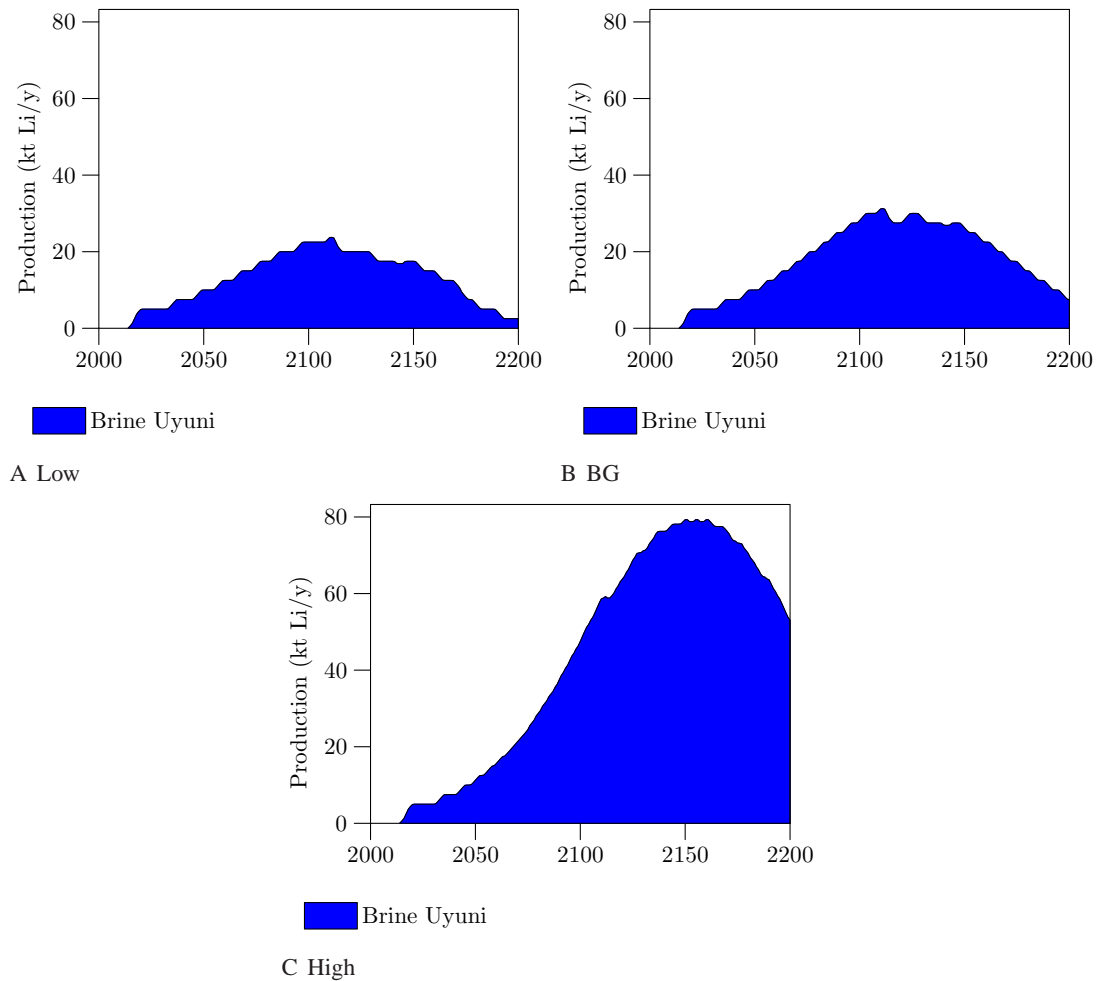

FIGURE 1.34. Scenarios for Bolivia

TABLE 1.93. Peak years for Bolivia

| Type        | Peak Year |      |      | Max Production |      |      |
|-------------|-----------|------|------|----------------|------|------|
|             | Low       | BG   | High | Low            | BG   | High |
| Brine Uyuni | 2111      | 2111 | 2155 | 23.8           | 31.3 | 79.3 |
| Brine Total | 2111      | 2111 | 2155 | 23.8           | 31.3 | 79.3 |
| Lithium     | 2111      | 2111 | 2155 | 23.8           | 31.3 | 79.3 |

TABLE 1.94. URR values for Bolivia

| Type        | URR    |        |         |
|-------------|--------|--------|---------|
|             | Low    | BG     | High    |
| Brine Uyuni | 2475.0 | 3560.0 | 10200.0 |
| Brine Total | 2475.0 | 3560.0 | 10200.0 |
| Lithium     | 2475.0 | 3560.0 | 10200.0 |

## 1.8.3. Brazil.

TABLE 1.95. Mining constants for Brazil

| Name         | $Y_s$ | $Q_T$   | $r_{Q_T}$ | $M_L$ | $M_H$ | $L_L$ | $L_H$ | $t_t$ | $r_t$ |
|--------------|-------|---------|-----------|-------|-------|-------|-------|-------|-------|
| Low Mineral  | 1998  | 46.152  | 3         | 0.1   | 0.1   | 60    | 60    | NA    | NA    |
| BG Mineral   | 1998  | 88.652  | 2         | 0.1   | 0.1   | 60    | 60    | NA    | NA    |
| High Mineral | 1998  | 193.652 | 2         | 0.1   | 0.1   | 60    | 60    | NA    | NA    |

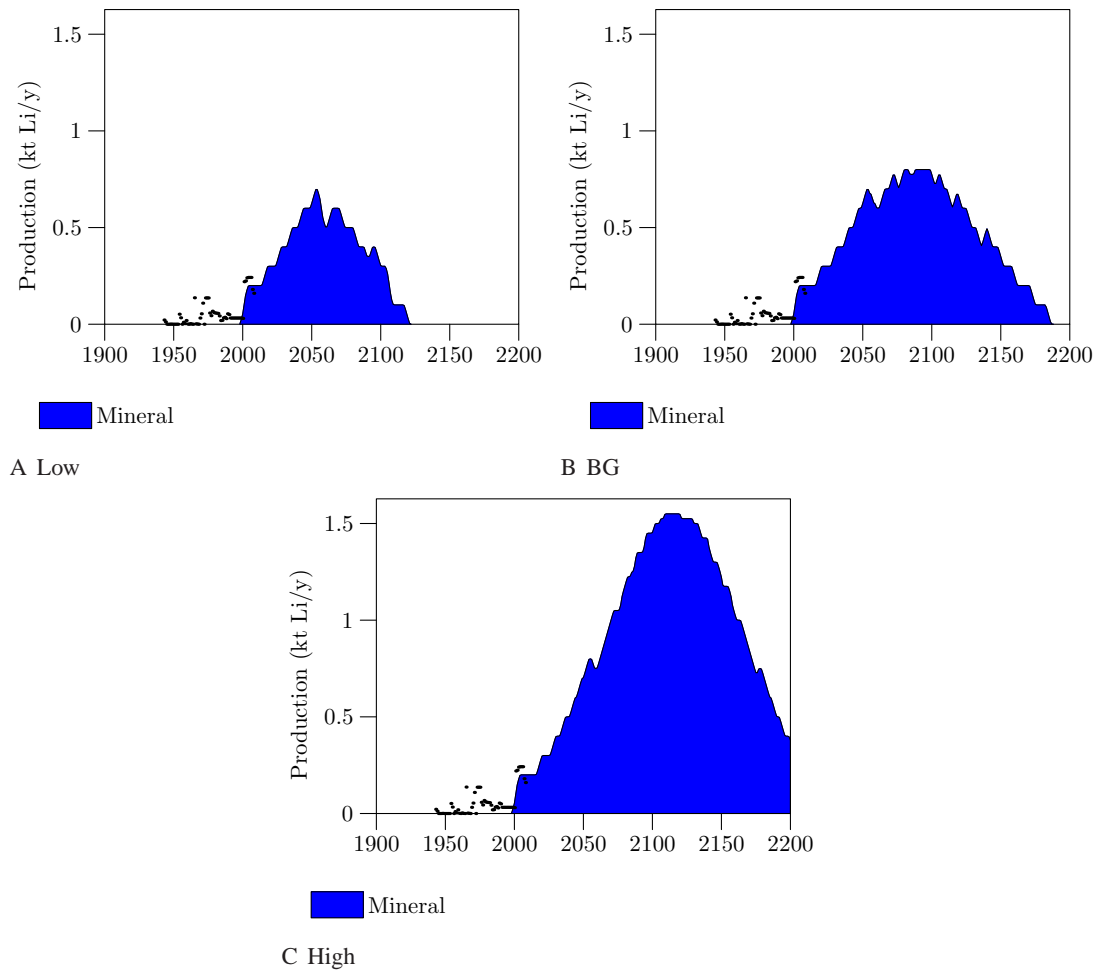

FIGURE 1.35. Scenarios for Brazil

TABLE 1.96. Peak years for Brazil

| Type    | Peak Year |      |      | Max Production |     |      |
|---------|-----------|------|------|----------------|-----|------|
|         | Low       | BG   | High | Low            | BG  | High |
| Mineral | 2053      | 2089 | 2114 | 0.7            | 0.8 | 1.6  |
| Lithium | 2053      | 2089 | 2114 | 0.7            | 0.8 | 1.6  |

TABLE 1.97. URR values for Brazil

| Type    | URR  |      |       |
|---------|------|------|-------|
|         | Low  | BG   | High  |
| Mineral | 46.2 | 88.7 | 193.7 |
| Lithium | 46.2 | 88.7 | 193.7 |

## 1.8.4. Chile.

TABLE 1.98. Mining constants for Chile

| Name                 | $Y_s$ | $Q_T$    | $r_{Q_T}$ | $M_L$ | $M_H$ | $L_L$ | $L_H$ | $t_t$ | $r_t$ |
|----------------------|-------|----------|-----------|-------|-------|-------|-------|-------|-------|
| Low Brine Maricunga  | 2020  | 99       | 4         | 3     | 3     | 55    | 55    | NA    | NA    |
| Low Brine Atacama    | 1982  | 6404.84  | 4.5       | 1     | 1     | 40    | 40    | NA    | NA    |
| BG Brine Maricunga   | 2020  | 220      | 4         | 5     | 5     | 70    | 70    | NA    | NA    |
| BG Brine Atacama     | 1982  | 7604.84  | 4.5       | 1     | 1     | 40    | 40    | NA    | NA    |
| High Brine Maricunga | 2020  | 220      | 4         | 5     | 5     | 70    | 70    | NA    | NA    |
| High Brine Atacama   | 1982  | 16169.84 | 4.5       | 1     | 1     | 40    | 40    | NA    | NA    |

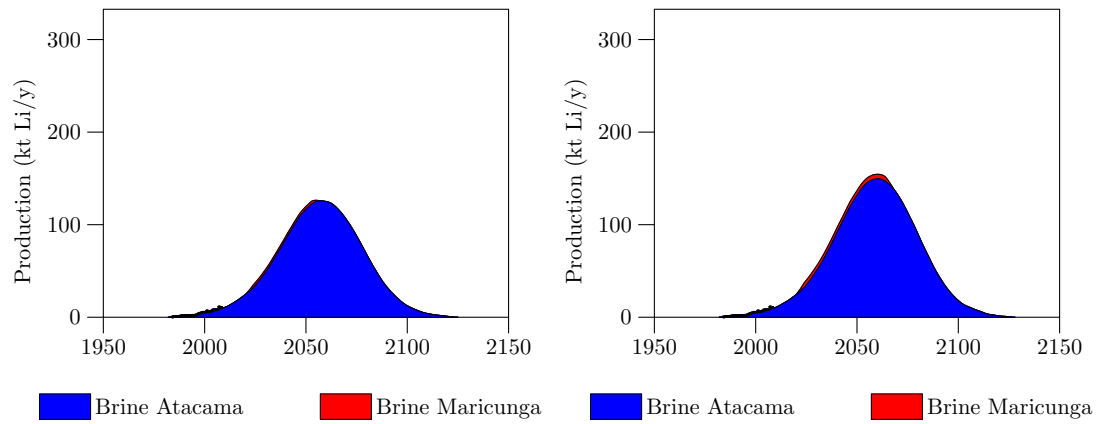

A Low

B BG

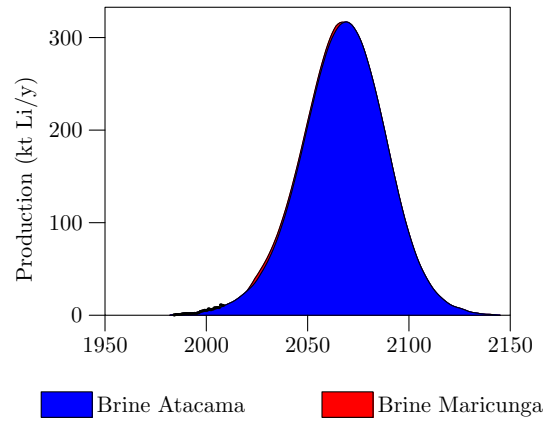

C High

FIGURE 1.36. Scenarios for Chile

TABLE 1.99. Peak years for Chile

| Type            | Peak Year |      |      | Max Production |       |       |
|-----------------|-----------|------|------|----------------|-------|-------|
|                 | Low       | BG   | High | Low            | BG    | High  |
| Brine Atacama   | 2057      | 2060 | 2069 | 125.7          | 149.5 | 316.9 |
| Brine Maricunga | 2038      | 2044 | 2044 | 3.0            | 5.0   | 5.0   |
| Brine Total     | 2055      | 2060 | 2069 | 126.4          | 154.5 | 316.9 |
| Lithium         | 2055      | 2060 | 2069 | 126.4          | 154.5 | 316.9 |

TABLE 1.100. URR values for Chile

| Type            | URR    |        |         |
|-----------------|--------|--------|---------|
|                 | Low    | BG     | High    |
| Brine Atacama   | 6404.8 | 7604.8 | 16169.8 |
| Brine Maricunga | 99.0   | 220.0  | 220.0   |
| Brine Total     | 6503.8 | 7824.8 | 16389.8 |
| Lithium         | 6503.8 | 7824.8 | 16389.8 |

## 1.8.5. Suriname.

TABLE 1.101. Mining constants for Suriname

| Name             | $Y_s$ | $Q_T$   | $r_{Q_T}$ | $M_L$ | $M_H$ | $L_L$ | $L_H$ | $t_t$ | $r_t$ |
|------------------|-------|---------|-----------|-------|-------|-------|-------|-------|-------|
| Low Amblygonite  | 1960  | 0.71e-1 | 4         | 0.12  | 0.12  | 60    | 60    | NA    | NA    |
| BG Amblygonite   | 1960  | 0.71e-1 | 4         | 0.12  | 0.12  | 60    | 60    | NA    | NA    |
| High Amblygonite | 1960  | 0.71e-1 | 4         | 0.12  | 0.12  | 60    | 60    | NA    | NA    |

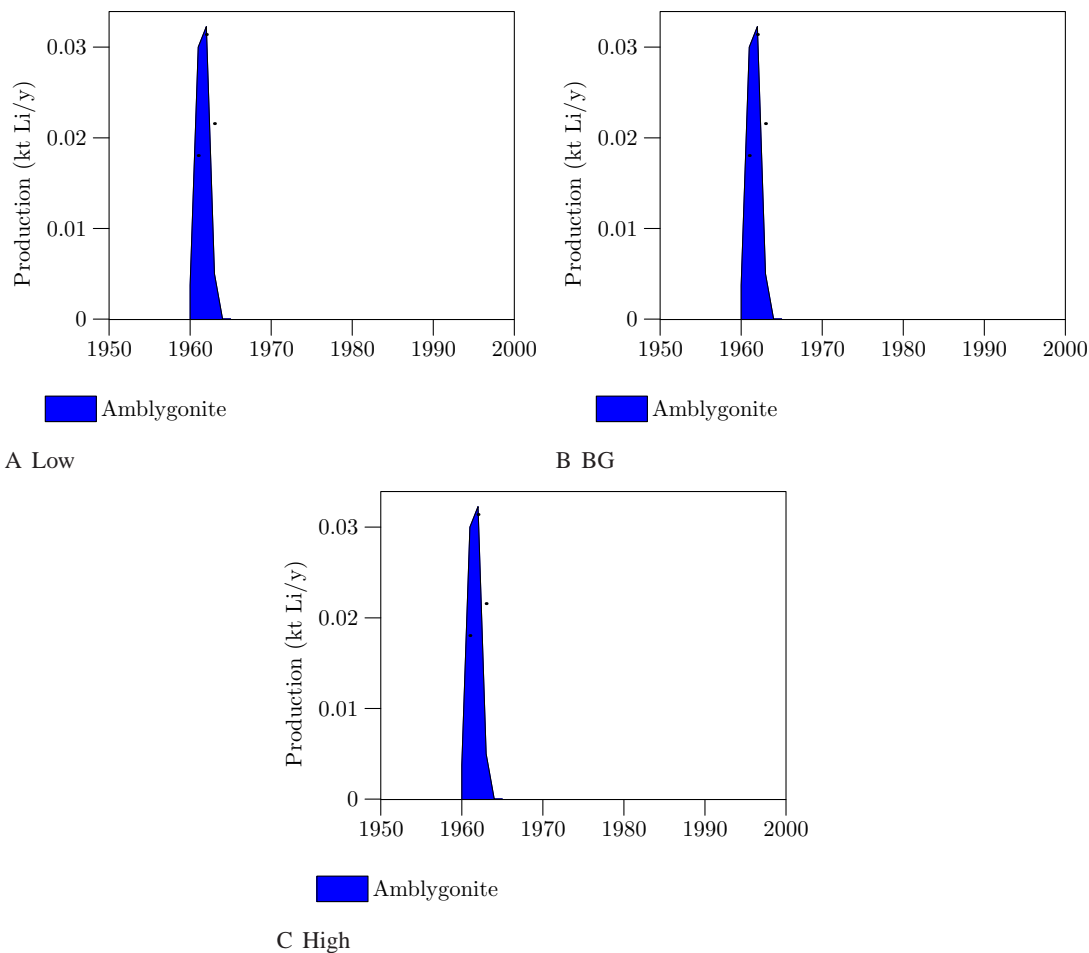

FIGURE 1.37. Scenarios for Suriname

TABLE 1.102. Peak years for Suriname

| Type        | Peak Year |      |      | Max Production |     |      |
|-------------|-----------|------|------|----------------|-----|------|
|             | Low       | BG   | High | Low            | BG  | High |
| Amblygonite | 1962      | 1962 | 1962 | 0.0            | 0.0 | 0.0  |
| Lithium     | 1962      | 1962 | 1962 | 0.0            | 0.0 | 0.0  |

TABLE 1.103. URR values for Suriname

| Type        | URR |     |      |
|-------------|-----|-----|------|
|             | Low | BG  | High |
| Amblygonite | 0.1 | 0.1 | 0.1  |
| Lithium     | 0.1 | 0.1 | 0.1  |



### 1.8.6. South America.

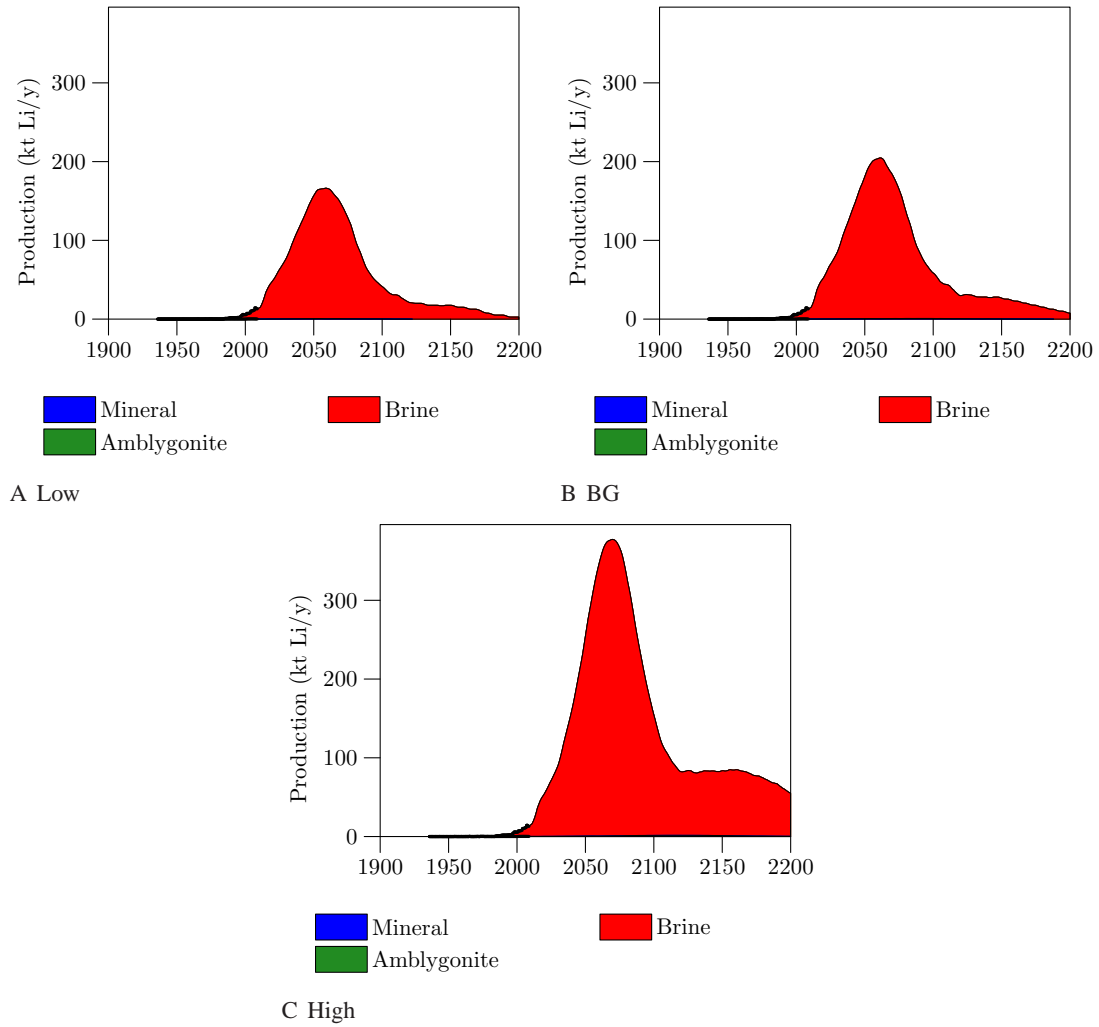

FIGURE 1.38. Scenarios for South America

TABLE 1.104. Peak years for South America

| Type        | Peak Year |      |      | Max Production |       |       |
|-------------|-----------|------|------|----------------|-------|-------|
|             | Low       | BG   | High | Low            | BG    | High  |
| Amblygonite | 1962      | 1962 | 1962 | 0.0            | 0.0   | 0.0   |
| Brine       | 2059      | 2061 | 2070 | 165.7          | 204.0 | 376.3 |
| Mineral     | 2053      | 2089 | 2114 | 0.7            | 0.8   | 1.6   |
| Lithium     | 2059      | 2061 | 2070 | 166.2          | 204.6 | 377.3 |

TABLE 1.105. URR values for South America

| Type        | URR     |         |         |
|-------------|---------|---------|---------|
|             | Low     | BG      | High    |
| Amblygonite | 10852.5 | 13892.8 | 29812.8 |
| Brine       | 10852.5 | 13892.7 | 29812.7 |
| Mineral     | 46.5    | 89.0    | 194.0   |
| Lithium     | 21751.5 | 27874.5 | 59819.5 |

## 1.9. World

## 1.9.1. World by Continent.

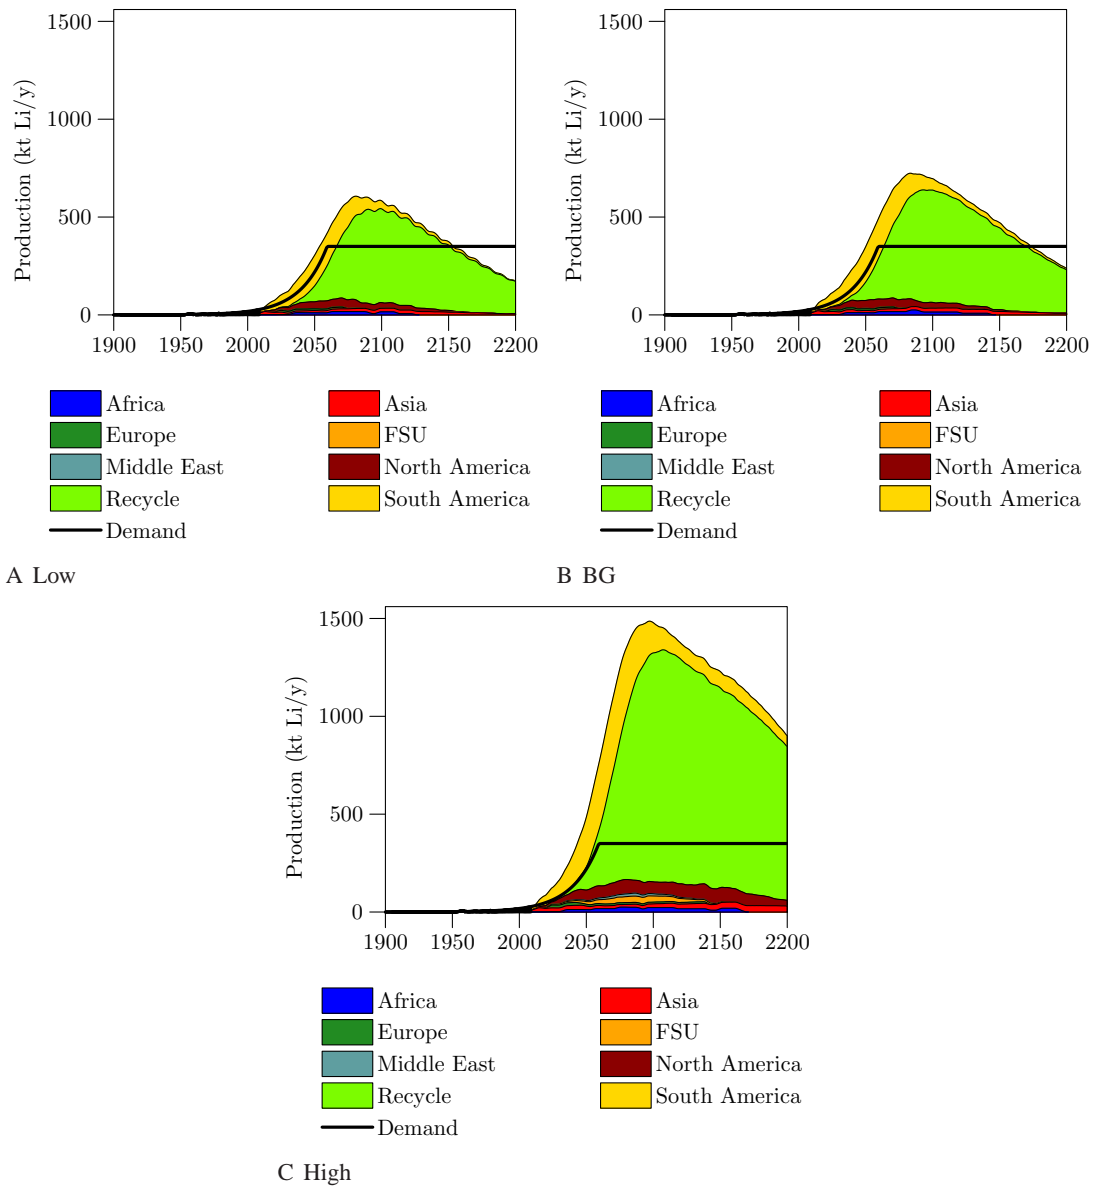

FIGURE 1.39. Scenarios for World by Continent

TABLE 1.106. Peak years for World by Continent

| Type          | Peak Year |      |      | Max Production |       |        |
|---------------|-----------|------|------|----------------|-------|--------|
|               | Low       | BG   | High | Low            | BG    | High   |
| Africa        | 2075      | 2085 | 2077 | 17.0           | 25.1  | 24.9   |
| Asia          | 2112      | 2112 | 2175 | 18.2           | 20.9  | 32.8   |
| Europe        | 2032      | 2025 | 2042 | 9.2            | 9.4   | 15.0   |
| FSU           | 2029      | 2029 | 2091 | 2.0            | 2.0   | 33.0   |
| Middle East   |           |      | 2086 |                |       | 15.4   |
| North America | 2078      | 2054 | 2140 | 45.8           | 45.7  | 79.3   |
| Recycle       | 2091      | 2094 | 2107 | 481.7          | 576.0 | 1187.8 |
| South America | 2059      | 2061 | 2070 | 166.2          | 204.6 | 377.3  |
| Total         | 2081      | 2083 | 2097 | 606.5          | 723.9 | 1486.3 |

TABLE 1.107. URR values for World by Continent

| Type          | URR     |         |          |
|---------------|---------|---------|----------|
|               | Low     | BG      | High     |
| Africa        | 1246.4  | 1605.5  | 2448.8   |
| Asia          | 2771.7  | 3330.3  | 6932.6   |
| Europe        | 453.1   | 466.7   | 1219.7   |
| FSU           | 179.8   | 179.8   | 2529.8   |
| Middle East   | -       | -       | 900.0    |
| North America | 3815.3  | 4082.8  | 11173.3  |
| Recycle       | 55331.7 | 70107.4 | 191901.9 |
| South America | 10852.5 | 13892.8 | 29812.8  |
| Total         | 74650.5 | 93665.2 | 246918.8 |

## 1.9.2. World by Fuel.

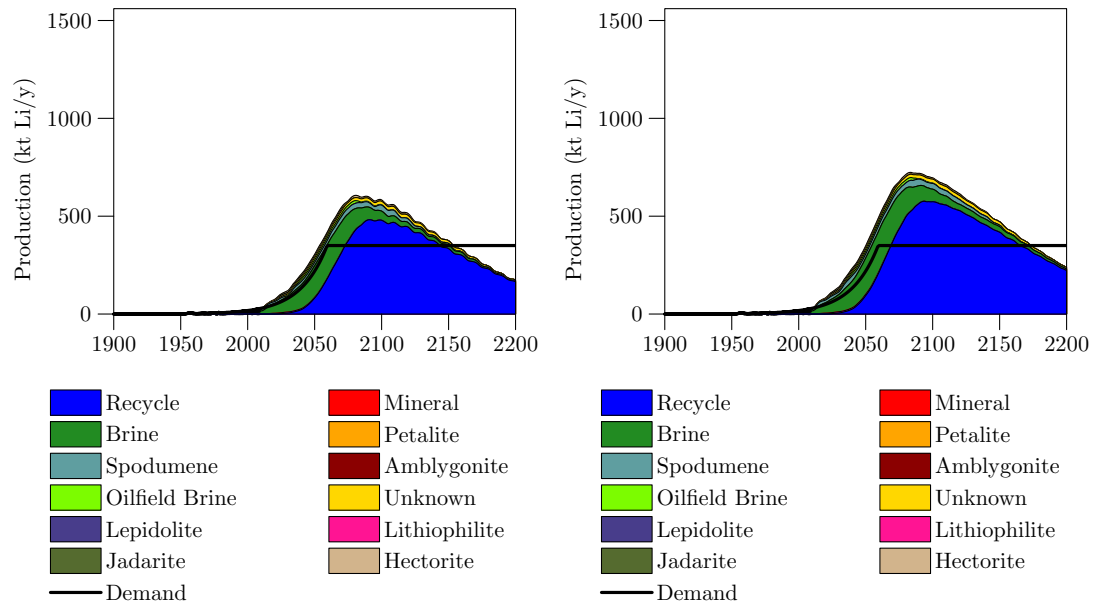

A Low

B BG

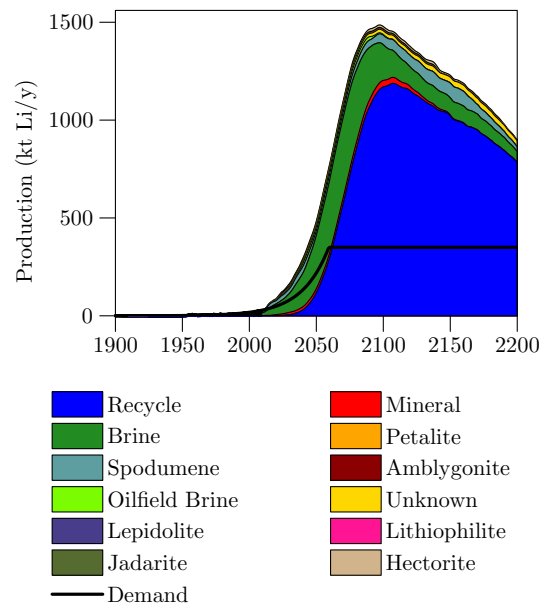

C High

FIGURE 1.40. Scenarios for World by Fuel

TABLE 1.108. Peak years for World by Fuel

| Type           | Peak Year |      |      | Max Production |       |        |
|----------------|-----------|------|------|----------------|-------|--------|
|                | Low       | BG   | High | Low            | BG    | High   |
| Amblygonite    | 1959      | 1959 | 1959 | 0.1            | 0.1   | 0.1    |
| Brine          | 2059      | 2061 | 2071 | 172.0          | 209.8 | 410.6  |
| Hectorite      | 2079      | 2079 | 2078 | 11.4           | 11.4  | 14.7   |
| Jadarite       | 2047      | 2047 | 2081 | 8.4            | 8.4   | 8.4    |
| Lepidolite     | 2007      | 2007 | 2070 | 0.1            | 0.1   | 1.1    |
| Lithiophilite  | 1952      | 1952 | 1952 | 0.0            | 0.0   | 0.0    |
| Mineral        | 2029      | 2047 | 2091 | 5.7            | 6.8   | 34.4   |
| Oilfield Brine | 2075      | 2076 | 2076 | 15.0           | 15.0  | 24.0   |
| Petalite       | 1968      | 1968 | 1968 | 0.0            | 0.0   | 0.0    |
| Recycle        | 2091      | 2094 | 2107 | 481.7          | 576.0 | 1187.8 |
| Spodumene      | 2103      | 2087 | 2152 | 30.7           | 35.7  | 77.8   |
| Unknown        | 2112      | 2112 | 2175 | 18.2           | 20.9  | 32.8   |
| Lithium        | 2081      | 2083 | 2097 | 606.5          | 723.9 | 1486.3 |

TABLE 1.109. URR values for World by Fuel

| Type           | URR     |         |          |
|----------------|---------|---------|----------|
|                | Low     | BG      | High     |
| Amblygonite    | 0.8     | 0.8     | 0.8      |
| Brine          | 11376.7 | 14399.8 | 32408.8  |
| Hectorite      | 1000.0  | 1000.0  | 2000.0   |
| Jadarite       | 425.0   | 425.0   | 990.0    |
| Lepidolite     | 0.9     | 0.9     | 72.9     |
| Lithiophilite  | -       | -       | -        |
| Mineral        | 383.5   | 504.6   | 3080.9   |
| Oilfield Brine | 707.5   | 757.5   | 1265.0   |
| Petalite       | 0.1     | 0.1     | 0.1      |
| Recycle        | 55331.7 | 70107.4 | 191901.9 |
| Spodumene      | 2701.3  | 3338.5  | 8802.5   |
| Unknown        | 2722.9  | 3130.6  | 6395.9   |
| Lithium        | 74650.5 | 93665.2 | 246918.8 |

1.9.3. Lithium.

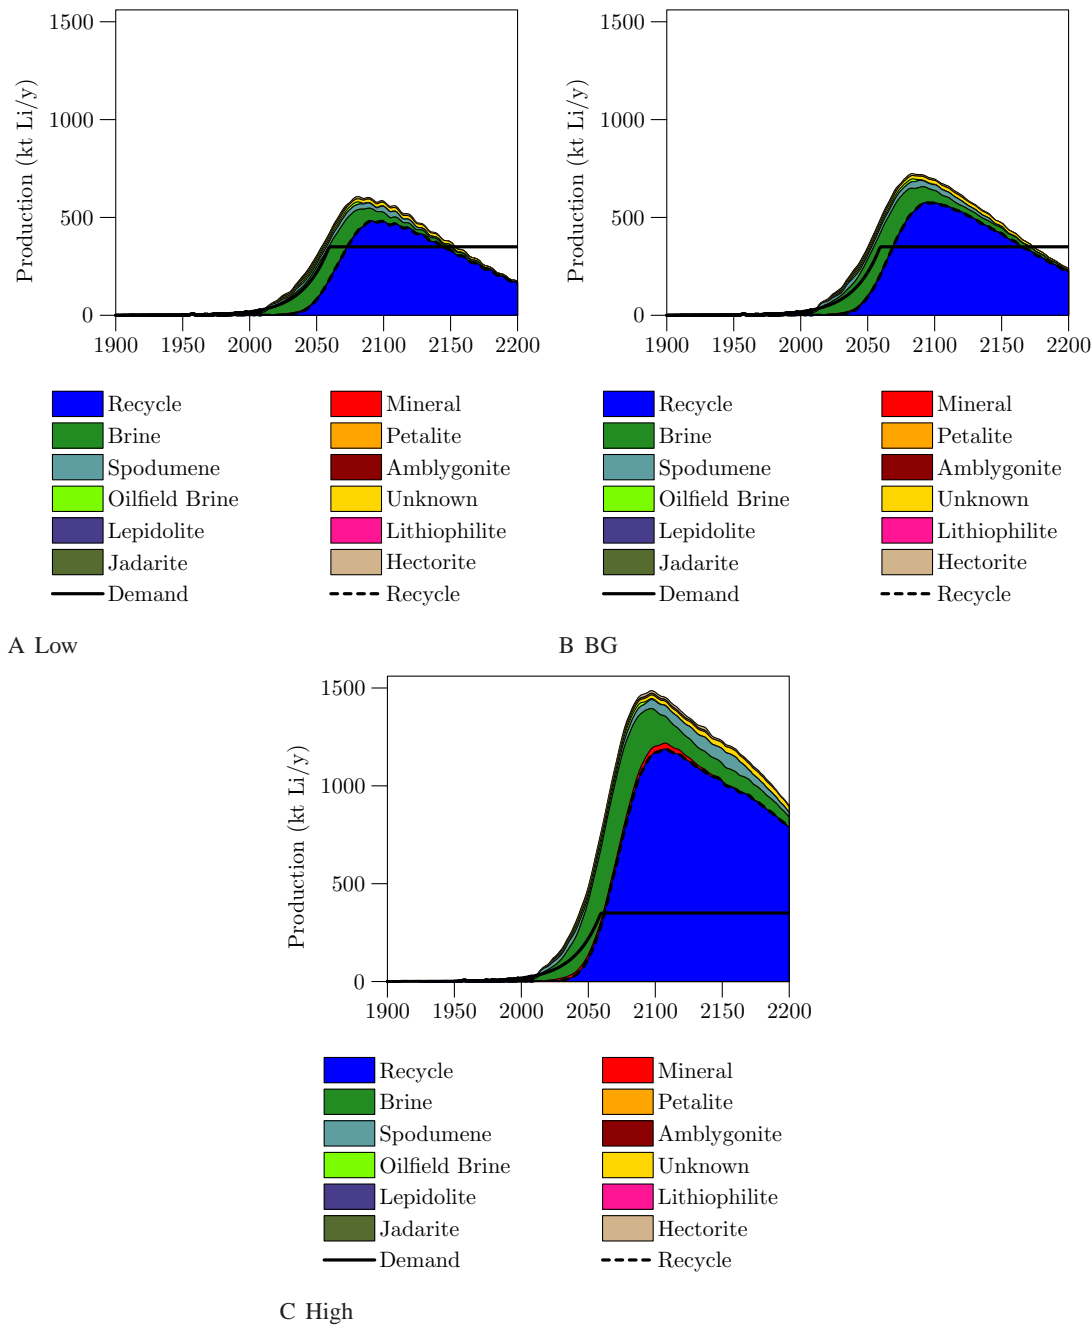

FIGURE 1.41. Scenarios for Lithium

TABLE 1.110. Peak years for Lithium

| Type           | Peak Year |      |      | Max Production |       |        |
|----------------|-----------|------|------|----------------|-------|--------|
|                | Low       | BG   | High | Low            | BG    | High   |
| Amblygonite    | 1959      | 1959 | 1959 | 0.1            | 0.1   | 0.1    |
| Brine          | 2059      | 2061 | 2071 | 172.0          | 209.8 | 410.6  |
| Hectorite      | 2079      | 2079 | 2078 | 11.4           | 11.4  | 14.7   |
| Jadarite       | 2047      | 2047 | 2081 | 8.4            | 8.4   | 8.4    |
| Lepidolite     | 2007      | 2007 | 2070 | 0.1            | 0.1   | 1.1    |
| Lithiophilite  | 1952      | 1952 | 1952 | 0.0            | 0.0   | 0.0    |
| Mineral        | 2029      | 2047 | 2091 | 5.7            | 6.8   | 34.4   |
| Oilfield Brine | 2075      | 2076 | 2076 | 15.0           | 15.0  | 24.0   |
| Petalite       | 1968      | 1968 | 1968 | 0.0            | 0.0   | 0.0    |
| Recycle        | 2091      | 2094 | 2107 | 481.7          | 576.0 | 1187.8 |
| Spodumene      | 2103      | 2087 | 2152 | 30.7           | 35.7  | 77.8   |
| Unknown        | 2112      | 2112 | 2175 | 18.2           | 20.9  | 32.8   |
| Lithium        | 2081      | 2083 | 2097 | 606.5          | 723.9 | 1486.3 |

TABLE 1.111. URR values for Lithium

| Type           | URR     |         |          |
|----------------|---------|---------|----------|
|                | Low     | BG      | High     |
| Amblygonite    | 0.8     | 0.8     | 0.8      |
| Brine          | 11376.7 | 14399.8 | 32408.8  |
| Hectorite      | 1000.0  | 1000.0  | 2000.0   |
| Jadarite       | 425.0   | 425.0   | 990.0    |
| Lepidolite     | 0.9     | 0.9     | 72.9     |
| Lithiophilite  | -       | -       | -        |
| Mineral        | 383.5   | 504.6   | 3080.9   |
| Oilfield Brine | 707.5   | 757.5   | 1265.0   |
| Petalite       | 0.1     | 0.1     | 0.1      |
| Recycle        | 55331.7 | 70107.4 | 191901.9 |
| Spodumene      | 2701.3  | 3338.5  | 8802.5   |
| Unknown        | 2722.9  | 3130.6  | 6395.9   |
| Lithium        | 74650.5 | 93665.2 | 246918.8 |
